# Supplementary material for: Using computed infrared intensities for the reduction of vibrational configuration interaction bases
Source: Royal Society of Chemistry journal article supplement (doi:10.1039/d0cp00593b), 2020-01-01
Supplement: d0cp00593b1.pdf [file d0cp00593b1.pdf]

Cite this: DOI: 00.0000/xxxxxxxxxx

## Using computed infrared intensities for the reduction of vibrational configuration interaction bases<sup>†</sup>

Vincent Le Bris,<sup>‡a</sup> Marc Odunlami,<sup>a</sup> Didier Bégué,<sup>a</sup> Isabelle Baraille,<sup>a</sup> and Olivier Coulaud<sup>b</sup>

Received Date  
Accepted Date

DOI: 00.0000/xxxxxxxxxx

The Adaptive Vibrational Configuration Interaction (A-VCI) algorithm is an iterative process that computes the anharmonic spectrum of a molecule using nested bases to discretize the Hamiltonian operator. For large molecular systems, the size of the discretization space and the computation time quickly become prohibitive. It is therefore necessary to develop new methods to further limit the number of basis functions. Most of the time, the interpretation of an experimental infrared spectrum does not require the calculation of all eigenvalues but only those corresponding to vibrational states with significant intensity. In this paper, a technique that uses infrared intensities is introduced to select a subset of eigenvalues to be precisely calculated. Thus, we build smaller nested bases and reduce both the memory footprint and the computational time. We validate the advantages of this new approach on a well-studied 7-atom molecular system ( $C_2H_4O$ ), and we apply it on a larger 10-atom molecule ( $C_4H_4N_2$ ).

<sup>a</sup> Université de Pau et des Pays de l'Adour, E2S UPPA, CNRS, IPREM, Institut des Sciences Analytiques et de Physicochimie pour l'Environnement et les Matériaux, UMR5254, Pau, France.

<sup>b</sup> HiePACS project-team, Inria Bordeaux Sud-Ouest, 200, avenue de la Vieille Tour, F-33405 Talence Cedex, France.

<sup>†</sup> Electronic Supplementary Information (ESI) available: [The supplementary material contains the PES, Coriolis and dipole moment coefficients used in this work for  $C_2H_4O$  and  $C_4H_4N_2$ . Detailed calculation results are also provided for the molecular systems considered in this work. See DOI: 00.0000/00000000.

<sup>‡</sup> Corresponding author : vincent.lebris@univ-pau.fr

# 1 PES, Coriolis and dipole moment surface coefficients

## 1.1 C<sub>2</sub>H<sub>4</sub>O

**Listing 1** C<sub>2</sub>H<sub>4</sub>O: fourth order polynomial PES at the CCSD(T)/cc-pVTZ - b3lyp/6-31+G\*\* level of theory (in cm<sup>-1</sup>)<sup>1</sup>

PES C2H4O - ccb3 (ccsd(t)/cc-pVTZ - B3LYP/6-31+G\*\*) - (Sorted By energy)

line 1 : dimension numberOfElements

line x : index[dimension] coeff

```
15 640 1
 2 0 0 0 0 0 0 0 0 0 0 0 0 0 0 0 407.7575
 0 2 0 0 0 0 0 0 0 0 0 0 0 0 0 0 425.08985
 0 0 2 0 0 0 0 0 0 0 0 0 0 0 0 0 449.78205
 0 0 0 2 0 0 0 0 0 0 0 0 0 0 0 0 526.1156
 0 0 0 0 2 0 0 0 0 0 0 0 0 0 0 0 578.4012
 0 0 0 0 0 2 0 0 0 0 0 0 0 0 0 0 578.95295
 0 0 0 0 0 0 2 0 0 0 0 0 0 0 0 0 587.4965
 0 0 0 0 0 0 0 2 0 0 0 0 0 0 0 0 588.02265
 0 0 0 0 0 0 0 0 2 0 0 0 0 0 0 0 650.05405
 0 0 0 0 0 0 0 0 0 2 0 0 0 0 0 0 756.175
 0 0 0 0 0 0 0 0 0 0 2 0 0 0 0 0 774.53695
 0 0 0 0 0 0 0 0 0 0 0 2 0 0 0 0 1554.7292
 0 0 0 0 0 0 0 0 0 0 0 0 2 0 0 0 1558.9383
 0 0 0 0 0 0 0 0 0 0 0 0 0 2 0 0 1598.28005
 0 0 0 0 0 0 0 0 0 0 0 0 0 0 0 2 1605.63245
 0 0 0 0 0 0 0 0 0 0 0 0 0 0 3 0 0 -160.17540666666667
 0 0 0 0 0 0 0 0 0 0 0 0 3 0 0 0 0 -17.18226
 0 0 0 0 0 0 0 0 0 3 0 0 0 0 0 0 0 -38.0455483333333336
 0 0 0 0 0 3 0 0 0 0 0 0 0 0 0 0 0 -2.6534983333333333
 0 0 3 0 0 0 0 0 0 0 0 0 0 0 0 0 0 3.1427516666666667
 0 0 0 0 0 0 0 0 0 0 0 1 0 2 0 0 0 -6.71818
 0 0 0 0 0 0 0 0 0 0 0 0 2 0 1 0 0 75.552845
 0 0 0 0 0 0 0 0 1 0 0 0 2 0 0 0 0 -12.2561
 0 0 0 0 0 0 0 0 1 0 2 0 0 0 0 0 0 -27.908625
 0 0 0 0 0 0 0 0 2 0 0 0 1 0 0 0 0 31.98326
 0 0 0 0 0 0 0 0 2 0 1 0 0 0 0 0 0 -55.130035
 0 0 0 0 0 1 0 0 0 0 0 0 0 2 0 0 0 -2.843825
 0 0 0 0 0 1 0 0 0 0 2 0 0 0 0 0 0 7.402305
 0 0 0 0 0 1 0 0 2 0 0 0 0 0 0 0 0 22.00575
 0 0 0 0 0 2 0 0 0 0 0 0 0 1 0 0 0 146.375435
 0 0 0 0 0 2 0 0 0 0 1 0 0 0 0 0 0 -53.70909
 0 0 0 0 0 2 0 0 1 0 0 0 0 0 0 0 0 -27.518965
 0 0 1 0 0 0 0 0 0 0 0 0 0 2 0 0 0 11.496815
 0 0 1 0 0 0 0 0 0 0 0 2 0 0 0 0 0 6.428135
 0 0 1 0 0 0 0 0 2 0 0 0 0 0 0 0 0 27.93203
 0 0 1 0 0 2 0 0 0 0 0 0 0 0 0 0 0 -22.3074
 0 0 2 0 0 0 0 0 0 0 0 0 0 1 0 0 0 14.60282
 0 0 2 0 0 0 0 0 0 0 1 0 0 0 0 0 0 -38.26971
 0 0 2 0 0 0 0 0 1 0 0 0 0 0 0 0 0 -82.58267
 0 0 2 0 0 1 0 0 0 0 0 0 0 0 0 0 0 37.69914
 0 0 0 0 0 0 0 0 0 0 0 0 0 0 1 2 0 -511.109245
 0 0 0 0 0 0 0 0 0 0 1 0 0 2 0 0 0 46.765835
 0 0 0 0 0 0 0 0 1 0 0 0 0 2 0 0 0 -14.1279
 0 0 0 0 0 1 0 0 0 0 0 0 0 0 2 0 0 3.8252
 0 0 1 0 0 0 0 0 0 0 0 0 0 0 2 0 0 10.644615
 0 0 0 0 0 0 2 0 0 0 0 1 0 0 0 0 0 112.280135
 0 0 0 0 0 0 2 0 0 1 0 0 0 0 0 0 0 28.11435
 0 0 0 0 0 0 2 1 0 0 0 0 0 0 0 0 0 -24.760835
 0 0 0 0 0 1 0 2 0 0 0 0 0 0 0 0 0 15.12358
 0 0 1 0 0 0 0 2 0 0 0 0 0 0 0 0 0 24.061955
 0 0 0 2 0 0 0 0 0 0 0 0 0 1 0 0 0 163.2218
 0 0 0 2 0 0 0 0 0 0 1 0 0 0 0 0 0 14.46394
 0 0 0 2 0 0 0 0 0 1 0 0 0 0 0 0 0 -25.61065
 0 0 0 2 0 1 0 0 0 0 0 0 0 0 0 0 0 3.072835
 0 0 1 2 0 0 0 0 0 0 0 0 0 0 0 0 0 -18.46661
 0 0 0 0 0 0 0 0 0 0 0 0 0 1 0 2 0 -505.725705
 0 0 0 0 0 0 0 0 0 0 1 0 0 0 2 0 0 45.782235
 0 0 0 0 0 0 0 0 1 0 0 0 0 0 2 0 0 -16.53605
```

0 0 0 0 0 1 0 0 0 0 0 0 0 0 2 5.22581  
0 0 1 0 0 0 0 0 0 0 0 0 0 0 2 13.56545  
0 0 0 0 0 0 2 0 0 0 0 0 1 0 0 116.785485  
0 0 0 0 0 0 2 0 0 0 1 0 0 0 0 18.06443  
0 0 0 0 0 0 2 0 1 0 0 0 0 0 0 -34.697465  
0 0 0 0 0 1 2 0 0 0 0 0 0 0 0 5.985665  
0 0 1 0 0 0 2 0 0 0 0 0 0 0 0 -30.082795  
2 0 0 0 0 0 0 0 0 0 0 0 0 1 0 233.151355  
2 0 0 0 0 0 0 0 0 0 0 1 0 0 0 33.93287  
2 0 0 0 0 0 0 0 0 1 0 0 0 0 0 -14.008945  
2 0 0 0 0 1 0 0 0 0 0 0 0 0 0 21.019365  
2 0 1 0 0 0 0 0 0 0 0 0 0 0 0 15.650555  
0 0 0 0 0 0 0 0 0 0 0 0 2 1 0 0 -482.033125  
0 0 0 0 0 0 0 0 0 0 1 2 0 0 0 -3.25906  
0 0 0 0 0 0 0 0 1 0 0 2 0 0 0 -10.892755  
0 0 0 0 0 1 0 0 0 0 0 2 0 0 0 -3.784775  
0 0 1 0 0 0 0 0 0 0 0 2 0 0 0 11.5515  
0 0 0 0 0 0 0 0 0 2 0 0 1 0 0 68.963815  
0 0 0 0 0 0 0 0 0 2 1 0 0 0 0 -36.542665  
0 0 0 0 0 0 0 0 1 2 0 0 0 0 0 -3.136695  
0 0 0 0 0 1 0 0 0 2 0 0 0 0 0 -3.09844  
0 0 1 0 0 0 0 0 0 2 0 0 0 0 0 -4.238495  
0 0 0 0 2 0 0 0 0 0 0 0 1 0 0 148.288895  
0 0 0 0 2 0 0 0 0 0 1 0 0 0 0 -34.833605  
0 0 0 0 2 0 0 0 1 0 0 0 0 0 0 -16.548925  
0 0 0 0 2 1 0 0 0 0 0 0 0 0 0 -14.12032  
0 0 1 0 2 0 0 0 0 0 0 0 0 0 0 3.257905  
0 2 0 0 0 0 0 0 0 0 0 0 0 1 0 0 12.541005  
0 2 0 0 0 0 0 0 0 0 0 1 0 0 0 0 -39.87914  
0 2 0 0 0 0 0 0 1 0 0 0 0 0 0 -60.20968  
0 2 0 0 0 1 0 0 0 0 0 0 0 0 0 85.7275  
0 2 1 0 0 0 0 0 0 0 0 0 0 0 0 -96.897955  
0 0 0 0 0 0 0 0 1 0 1 0 1 0 0 0.14937  
0 0 0 0 0 1 0 0 0 0 1 0 1 0 0 11.17474  
0 0 0 0 0 1 0 0 1 0 0 0 1 0 0 103.26412  
0 0 0 0 0 1 0 0 1 0 1 0 0 0 0 -8.6986  
0 0 1 0 0 0 0 0 0 0 0 1 0 1 0 0 -13.28982  
0 0 1 0 0 0 0 0 0 1 0 0 0 1 0 0 1.30979  
0 0 1 0 0 0 0 0 1 0 1 0 0 0 0 37.49826  
0 0 1 0 0 1 0 0 0 0 0 0 0 1 0 0 47.77804  
0 0 1 0 0 1 0 0 0 0 0 1 0 0 0 0 32.91363  
0 0 1 0 0 1 0 0 1 0 0 0 0 0 0 44.13164  
0 0 0 0 0 0 0 1 0 0 0 0 1 1 0 7.00312  
0 0 0 0 0 0 0 1 0 0 1 0 0 1 0 -201.02626  
0 0 0 0 0 0 0 1 1 0 0 0 0 1 0 -18.82408  
0 0 0 0 0 1 0 1 0 0 0 0 0 1 0 -118.61968  
0 0 1 0 0 0 0 1 0 0 0 0 0 1 0 -12.64284  
0 0 0 1 0 0 0 0 0 0 0 0 0 1 1 0 7.17572  
0 0 0 1 0 0 0 0 0 0 0 1 0 0 1 0 107.07425  
0 0 0 1 0 0 0 0 0 1 0 0 0 0 1 0 -117.26292  
0 0 0 1 0 1 0 0 0 0 0 0 0 0 1 0 -271.55931  
0 0 1 1 0 0 0 0 0 0 0 0 0 0 1 0 -57.82458  
0 0 0 1 0 0 0 1 0 0 0 0 0 1 0 0 -4.54649  
0 0 0 1 0 0 0 1 0 0 1 0 0 0 0 -17.28101  
0 0 0 1 0 1 0 1 0 0 0 0 0 0 0 -8.60656  
0 0 1 1 0 0 0 1 0 0 0 0 0 0 0 51.04273  
0 0 0 0 0 0 1 0 0 0 0 0 0 1 0 1 14.65562  
0 0 0 0 0 0 1 0 0 0 1 0 0 0 1 166.27089  
0 0 0 0 0 0 1 0 1 0 0 0 0 0 1 -83.78796  
0 0 0 0 0 1 1 0 0 0 0 0 0 0 1 -152.85245  
0 0 1 0 0 0 1 0 0 0 0 0 0 0 1 -39.00555  
1 0 0 0 0 0 0 0 0 0 0 0 0 1 0 1 43.67043  
1 0 0 0 0 0 0 0 0 0 0 0 1 0 0 0 1 -218.53792  
1 0 0 0 0 0 0 0 0 1 0 0 0 0 0 1 -65.95297  
1 0 0 0 0 1 0 0 0 0 0 0 0 0 0 1 -275.36383  
1 0 1 0 0 0 0 0 0 0 0 0 0 0 0 1 -57.35534  
1 0 0 0 0 0 1 0 0 0 0 0 0 1 0 0 -36.57845

|                               |             |
|-------------------------------|-------------|
| 1 0 0 0 0 0 1 0 0 0 1 0 0 0 0 | -27.27919   |
| 1 0 0 0 0 0 1 0 1 0 0 0 0 0 0 | 6.52845     |
| 1 0 0 0 0 1 1 0 0 0 0 0 0 0 0 | 3.07816     |
| 1 0 1 0 0 0 1 0 0 0 0 0 0 0 0 | 12.35482    |
| 0 0 0 0 0 0 0 0 0 0 0 1 0 1 1 | -1015.93153 |
| 0 0 0 0 0 0 0 1 0 0 0 1 0 0 1 | -0.5723     |
| 0 0 0 1 0 0 0 0 0 0 0 1 0 0 1 | 7.39939     |
| 0 0 0 0 0 0 1 0 0 0 0 1 0 1 0 | 17.48576    |
| 0 0 0 0 0 0 1 1 0 0 0 1 0 0 0 | -107.23245  |
| 0 0 0 1 0 0 1 0 0 0 0 1 0 0 0 | 247.07056   |
| 1 0 0 0 0 0 0 0 0 0 0 1 0 1 0 | 46.16205    |
| 1 0 0 0 0 0 0 1 0 0 0 1 0 0 0 | 300.83062   |
| 1 0 0 1 0 0 0 0 0 0 0 1 0 0 0 | 136.07208   |
| 0 0 0 0 0 0 0 0 0 1 0 0 0 1 1 | -101.12601  |
| 0 0 0 0 0 0 0 1 0 1 0 0 0 0 1 | 192.98876   |
| 0 0 0 1 0 0 0 0 0 1 0 0 0 0 1 | -103.67259  |
| 0 0 0 0 0 0 1 0 0 1 0 0 0 1 0 | -166.15069  |
| 0 0 0 0 0 0 1 1 0 1 0 0 0 0 0 | 40.54302    |
| 0 0 0 1 0 0 1 0 0 1 0 0 0 0 0 | -42.59722   |
| 1 0 0 0 0 0 0 0 0 1 0 0 0 1 0 | 222.94563   |
| 1 0 0 0 0 0 0 1 0 1 0 0 0 0 0 | -62.90283   |
| 1 0 0 1 0 0 0 0 0 1 0 0 0 0 0 | -13.83135   |
| 0 0 0 0 0 0 0 0 0 1 0 1 1 0 0 | -1.25257    |
| 0 0 0 0 0 0 0 0 0 1 1 1 0 0 0 | -139.43788  |
| 0 0 0 0 0 0 0 0 1 1 0 1 0 0 0 | 10.05481    |
| 0 0 0 0 0 1 0 0 0 1 0 1 0 0 0 | -13.429     |
| 0 0 1 0 0 0 0 0 0 1 0 1 0 0 0 | 7.87035     |
| 0 0 0 0 1 0 0 0 0 0 0 0 0 1 1 | -9.07805    |
| 0 0 0 0 1 0 0 1 0 0 0 0 0 0 1 | 113.47334   |
| 0 0 0 1 1 0 0 0 0 0 0 0 0 0 1 | 284.56776   |
| 0 0 0 0 1 0 1 0 0 0 0 0 0 1 0 | 163.851     |
| 0 0 0 0 1 0 1 1 0 0 0 0 0 0 0 | -15.66548   |
| 0 0 0 1 1 0 1 0 0 0 0 0 0 0 0 | 39.594      |
| 1 0 0 0 1 0 0 0 0 0 0 0 0 1 0 | 279.4888    |
| 1 0 0 0 1 0 0 1 0 0 0 0 0 0 0 | -21.7126    |
| 1 0 0 1 1 0 0 0 0 0 0 0 0 0 0 | -16.92955   |
| 0 0 0 0 1 0 0 0 0 0 0 1 1 0 0 | 3.31319     |
| 0 0 0 0 1 0 0 0 0 0 0 1 1 0 0 | -7.60613    |
| 0 0 0 0 1 0 0 0 1 0 0 1 0 0 0 | -102.9277   |
| 0 0 0 0 1 1 0 0 0 0 0 1 0 0 0 | -287.7415   |
| 0 0 1 0 1 0 0 0 0 0 0 1 0 0 0 | -53.27858   |
| 0 0 0 0 1 0 0 0 0 1 0 0 1 0 0 | 8.0668      |
| 0 0 0 0 1 0 0 0 0 1 1 0 0 0 0 | -13.12579   |
| 0 0 0 0 1 0 0 0 1 1 0 0 0 0 0 | -16.62133   |
| 0 0 0 0 1 1 0 0 0 1 0 0 0 0 0 | -61.90434   |
| 0 0 1 0 1 0 0 0 0 1 0 0 0 0 0 | 11.22999    |
| 0 1 0 0 0 0 0 0 0 0 0 0 0 1 1 | -68.53804   |
| 0 1 0 0 0 0 0 1 0 0 0 0 0 0 1 | 9.71429     |
| 0 1 0 1 0 0 0 0 0 0 0 0 0 0 1 | -117.4439   |
| 0 1 0 0 0 0 1 0 0 0 0 0 0 1 0 | -94.54635   |
| 0 1 0 0 0 0 1 1 0 0 0 0 0 0 0 | -18.99461   |
| 0 1 0 1 0 0 1 0 0 0 0 0 0 0 0 | 66.82366    |
| 1 1 0 0 0 0 0 0 0 0 0 0 0 1 0 | -33.64157   |
| 1 1 0 0 0 0 0 1 0 0 0 0 0 0 0 | 0.93319     |
| 1 1 0 1 0 0 0 0 0 0 0 0 0 0 0 | 33.85948    |
| 0 1 0 0 0 0 0 0 0 0 0 1 1 0 0 | -46.7233    |
| 0 1 0 0 0 0 0 0 0 0 0 1 1 0 0 | -30.90389   |
| 0 1 0 0 0 0 0 0 1 0 0 1 0 0 0 | 49.06091    |
| 0 1 0 0 0 1 0 0 0 0 0 1 0 0 0 | 84.71693    |
| 0 1 1 0 0 0 0 0 0 0 0 1 0 0 0 | 28.46554    |
| 0 1 0 0 0 0 0 0 0 1 0 0 1 0 0 | 32.5279     |
| 0 1 0 0 0 0 0 0 0 1 1 0 0 0 0 | -23.83504   |
| 0 1 0 0 0 0 0 0 1 1 0 0 0 0 0 | 15.88514    |
| 0 1 0 0 0 1 0 0 0 1 0 0 0 0 0 | 23.66559    |
| 0 1 1 0 0 0 0 0 0 1 0 0 0 0 0 | 8.08268     |
| 0 1 0 0 1 0 0 0 0 0 0 0 1 0 0 | -97.7103    |
| 0 1 0 0 1 0 0 0 0 0 1 0 0 0 0 | 26.38424    |

0 1 0 0 1 0 0 0 1 0 0 0 0 0 0 0 -41.63832  
0 1 0 0 1 1 0 0 0 0 0 0 0 0 0 0 -54.539  
0 1 1 0 1 0 0 0 0 0 0 0 0 0 0 0 -35.61058  
0 0 0 0 0 0 0 0 0 0 0 0 0 4 0 0 10.999062916666666  
0 0 0 0 0 0 0 0 0 0 0 0 4 0 0 0 1.2508929166666667  
0 0 0 0 0 0 0 0 0 4 0 0 0 0 0 0 1.9276129166666667  
0 0 0 0 0 4 0 0 0 0 0 0 0 0 0 0 3.6228829166666667  
0 0 4 0 0 0 0 0 0 0 0 0 0 0 0 0 0.2516758333333333  
0 0 0 0 0 0 0 0 0 0 0 0 0 0 4 0 12.480830833333334  
0 0 0 0 0 0 0 4 0 0 0 0 0 0 0 0 2.7280804166666663  
0 0 0 4 0 0 0 0 0 0 0 0 0 0 0 0 5.049132916666667  
0 0 0 0 0 0 0 0 0 0 0 0 0 0 0 4 12.287185000000001  
0 0 0 0 0 0 4 0 0 0 0 0 0 0 0 0 3.04654875  
4 0 0 0 0 0 0 0 0 0 0 0 0 0 0 0 10.908398750000002  
0 0 0 0 0 0 0 0 0 0 0 4 0 0 0 0 11.005125833333333  
0 0 0 0 0 0 0 0 4 0 0 0 0 0 0 0 1.0045204166666666  
0 0 0 0 4 0 0 0 0 0 0 0 0 0 0 0 4.643093333333334  
0 4 0 0 0 0 0 0 0 0 0 0 0 0 0 0 2.045115  
0 0 0 0 0 0 0 0 0 0 1 0 3 0 0 0 0.798656666666667  
0 0 0 0 0 0 0 0 0 2 0 2 0 0 0 -24.7642675  
0 0 0 0 0 0 0 0 0 3 0 1 0 0 0 2.705268333333333  
0 0 0 0 0 0 0 1 0 0 0 3 0 0 0 0.795916666666667  
0 0 0 0 0 0 0 1 0 3 0 0 0 0 0 0.337796666666667  
0 0 0 0 0 0 0 2 0 0 0 2 0 0 -5.908995  
0 0 0 0 0 0 0 2 0 2 0 0 0 0 0 3.6475475  
0 0 0 0 0 0 0 3 0 0 0 1 0 0 -1.230046666666667  
0 0 0 0 0 0 0 3 0 1 0 0 0 0 3.567328333333333  
0 0 0 0 0 1 0 0 0 0 0 3 0 0 0.4248333333333334  
0 0 0 0 0 1 0 0 0 0 3 0 0 0 0.401201666666667  
0 0 0 0 0 1 0 0 3 0 0 0 0 0 0 -0.183856666666667  
0 0 0 0 0 2 0 0 0 0 0 2 0 0 -35.199175  
0 0 0 0 0 2 0 0 0 0 2 0 0 0 0 3.4516375  
0 0 0 0 0 2 0 0 2 0 0 0 0 0 0 4.1990375  
0 0 0 0 0 3 0 0 0 0 0 1 0 0 1.850241666666667  
0 0 0 0 0 3 0 0 0 0 1 0 0 0 0 -0.5971  
0 0 0 0 0 3 0 0 1 0 0 0 0 0 0 3.39322  
0 0 1 0 0 0 0 0 0 0 0 0 3 0 0 -0.8531483333333334  
0 0 1 0 0 0 0 0 0 0 3 0 0 0 0 -0.236696666666667  
0 0 1 0 0 0 0 0 3 0 0 0 0 0 0 -2.912865  
0 0 1 0 0 3 0 0 0 0 0 0 0 0 0 4.58465  
0 0 2 0 0 0 0 0 0 0 0 0 2 0 0 -1.7344275  
0 0 2 0 0 0 0 0 0 0 2 0 0 0 0 3.4376975  
0 0 2 0 0 0 0 0 2 0 0 0 0 0 0 8.08415  
0 0 2 0 0 2 0 0 0 0 0 0 0 0 0 2.3813625  
0 0 3 0 0 0 0 0 0 0 0 1 0 0 0.207186666666667  
0 0 3 0 0 0 0 0 0 1 0 0 0 0 -0.681476666666667  
0 0 3 0 0 0 0 1 0 0 0 0 0 0 -1.514971666666667  
0 0 3 0 0 1 0 0 0 0 0 0 0 0 0 -0.4076983333333333  
0 0 0 0 0 0 0 0 0 0 0 0 2 2 0 70.73537  
0 0 0 0 0 0 0 0 0 0 2 0 0 2 0 -31.9641375  
0 0 0 0 0 0 0 0 2 0 0 0 0 2 0 -7.258065  
0 0 0 0 0 2 0 0 0 0 0 0 0 2 0 -38.5328725  
0 0 2 0 0 0 0 0 0 0 0 0 0 2 0 -2.628895  
0 0 0 0 0 0 0 1 0 0 0 0 0 3 0 4.188465  
0 0 0 0 0 0 0 2 0 0 0 0 2 0 0 -30.28679  
0 0 0 0 0 0 0 2 0 0 2 0 0 0 0 9.4843325  
0 0 0 0 0 0 0 2 2 0 0 0 0 0 0 0.182205  
0 0 0 0 0 2 0 2 0 0 0 0 0 0 0 6.70922  
0 0 2 0 0 0 0 2 0 0 0 0 0 0 0 0.177875  
0 0 0 0 0 0 0 2 0 0 0 0 0 2 0 -31.44756  
0 0 0 0 0 0 0 3 0 0 0 0 0 1 0 2.321258333333333  
0 0 0 1 0 0 0 0 0 0 0 0 0 3 0 -2.277861666666667  
0 0 0 1 0 0 0 3 0 0 0 0 0 0 0 -0.9081333333333333  
0 0 0 2 0 0 0 0 0 0 0 0 2 0 0 -41.194975  
0 0 0 2 0 0 0 0 0 2 0 0 0 0 0 3.9143825  
0 0 0 2 0 0 0 0 2 0 0 0 0 0 0 3.880325  
0 0 0 2 0 2 0 0 0 0 0 0 0 0 0 18.371075



0 0 0 0 2 0 0 0 2 0 0 0 0 0 0 3.3852325  
0 0 0 0 2 2 0 0 0 0 0 0 0 0 0 23.4265825  
0 0 0 0 2 0 0 0 0 0 0 0 0 2 0 -42.1777875  
0 0 0 0 2 0 0 2 0 0 0 0 0 0 0 7.993945  
0 0 0 2 2 0 0 0 0 0 0 0 0 0 0 23.71246  
0 0 0 0 2 0 0 0 0 0 0 0 0 0 2 -41.3332775  
0 0 0 0 2 0 2 0 0 0 0 0 0 0 0 11.6522475  
2 0 0 0 2 0 0 0 0 0 0 0 0 0 0 25.0671675  
0 0 0 0 2 0 0 0 0 0 0 2 0 0 0 -37.8697175  
0 0 0 0 2 0 0 0 0 2 0 0 0 0 0 3.807845  
0 0 0 0 3 0 0 0 0 0 0 1 0 0 0 -0.473875  
0 0 0 0 3 0 0 0 0 1 0 0 0 0 0 0.014879999999999999  
0 1 0 0 0 0 0 0 0 0 0 3 0 0 0 1.8356866666666667  
0 1 0 0 0 0 0 0 3 0 0 0 0 0 0 1.0366616666666666  
0 1 0 0 3 0 0 0 0 0 0 0 0 0 0 -5.0184050000000004  
0 2 0 0 0 0 0 0 0 0 0 2 0 0 -3.9305925  
0 2 0 0 0 0 0 0 0 2 0 0 0 0 0.9367125  
0 2 0 0 0 0 0 2 0 0 0 0 0 0 3.7355325  
0 2 0 0 0 2 0 0 0 0 0 0 0 0 7.6862625  
0 2 2 0 0 0 0 0 0 0 0 0 0 0 7.6098425  
0 2 0 0 0 0 0 0 0 0 0 0 2 0 -4.59234  
0 2 0 0 0 0 2 0 0 0 0 0 0 0 -0.07857  
0 2 0 2 0 0 0 0 0 0 0 0 0 0 3.0230075  
0 2 0 0 0 0 0 0 0 0 0 0 2 -4.409255  
0 2 0 0 0 2 0 0 0 0 0 0 0 0 2.2409025  
2 2 0 0 0 0 0 0 0 0 0 0 0 0 -1.4739675  
0 2 0 0 0 0 0 0 0 0 2 0 0 0 -3.6668075  
0 2 0 0 0 0 0 0 2 0 0 0 0 0 0.6241  
0 2 0 0 2 0 0 0 0 0 0 0 0 0 0.99484  
0 3 0 0 0 0 0 0 0 0 1 0 0 0 -0.2561816666666667  
0 3 0 0 0 0 0 0 1 0 0 0 0 0 1.3967566666666666  
0 3 0 0 1 0 0 0 0 0 0 0 0 0 0.6505883333333333  
0 0 0 0 0 0 0 1 0 1 0 2 0 0 11.006185  
0 0 0 0 0 0 0 1 0 2 0 1 0 0 -2.53942  
0 0 0 0 0 0 0 2 0 1 0 1 0 0 -1.14356  
0 0 0 0 0 1 0 0 0 0 1 0 2 0 0 -4.92937  
0 0 0 0 0 1 0 0 0 2 0 1 0 0 0.932335  
0 0 0 0 0 1 0 0 1 0 0 0 2 0 0 -24.99863  
0 0 0 0 0 1 0 0 1 0 2 0 0 0 0 -0.233235  
0 0 0 0 0 1 0 0 2 0 0 0 1 0 0 -1.119065  
0 0 0 0 0 1 0 0 2 0 1 0 0 0 0 -2.63153  
0 0 0 0 0 2 0 0 0 0 1 0 1 0 0 7.99885  
0 0 0 0 0 2 0 0 1 0 0 0 1 0 0 -1.259385  
0 0 0 0 0 2 0 0 1 0 1 0 0 0 0 -0.48582  
0 0 1 0 0 0 0 0 0 0 1 0 2 0 0 0.35861  
0 0 1 0 0 0 0 0 0 2 0 1 0 0 1.71746  
0 0 1 0 0 0 0 0 1 0 0 0 2 0 0 -6.69824  
0 0 1 0 0 0 0 0 1 0 2 0 0 0 0 -2.94701  
0 0 1 0 0 0 0 0 2 0 0 0 1 0 0 2.74928  
0 0 1 0 0 0 0 0 2 0 1 0 0 0 0 -5.93494  
0 0 1 0 0 1 0 0 0 0 0 0 2 0 0 -17.12994  
0 0 1 0 0 1 0 0 0 0 2 0 0 0 0 -0.147625  
0 0 1 0 0 1 0 0 2 0 0 0 0 0 0 -0.87752  
0 0 1 0 0 2 0 0 0 0 0 0 1 0 0 0.82414  
0 0 1 0 0 2 0 0 0 0 1 0 0 0 0 3.228755  
0 0 1 0 0 2 0 0 1 0 0 0 0 0 0 9.93158  
0 0 2 0 0 0 0 0 0 0 1 0 1 0 0 -2.17238  
0 0 2 0 0 0 0 0 1 0 0 0 1 0 0 -1.722665  
0 0 2 0 0 0 0 0 1 0 1 0 0 0 0 8.46803  
0 0 2 0 0 1 0 0 0 0 0 0 1 0 0 1.02091  
0 0 2 0 0 1 0 0 0 0 1 0 0 0 0 -1.851375  
0 0 2 0 0 1 0 0 1 0 0 0 0 0 0 -5.779575  
0 0 0 0 0 0 0 0 0 0 1 0 1 2 0 -9.459015  
0 0 0 0 0 0 0 0 1 0 0 0 1 2 0 5.59968  
0 0 0 0 0 0 0 0 1 0 1 0 0 2 0 13.25928  
0 0 0 0 0 1 0 0 0 0 0 0 1 2 0 -0.585735  
0 0 0 0 0 1 0 0 0 0 1 0 0 2 0 -6.21874

0 0 0 0 0 1 0 0 1 0 0 0 0 2 0 -26.8905  
0 0 1 0 0 0 0 0 0 0 0 1 2 0 -2.96623  
0 0 1 0 0 0 0 0 0 0 1 0 0 2 0 0.388135  
0 0 1 0 0 0 0 0 1 0 0 0 0 2 0 -6.7147  
0 0 1 0 0 1 0 0 0 0 0 0 0 2 0 -18.41549  
0 0 0 0 0 0 0 1 0 0 0 0 2 1 0 -1.14928  
0 0 0 0 0 0 0 1 0 0 2 0 0 1 0 -5.496555  
0 0 0 0 0 0 0 1 2 0 0 0 0 1 0 1.33695  
0 0 0 0 0 2 0 1 0 0 0 0 0 1 0 -2.299485  
0 0 2 0 0 0 0 1 0 0 0 0 0 1 0 2.10945  
0 0 0 0 0 0 0 2 0 0 1 0 1 0 0 -4.376965  
0 0 0 0 0 0 0 2 1 0 0 0 1 0 0 3.22624  
0 0 0 0 0 0 0 2 1 0 1 0 0 0 0 -2.859605  
0 0 0 0 0 1 0 2 0 0 0 0 1 0 0 -2.33767  
0 0 0 0 0 1 0 2 0 0 1 0 0 0 0 8.362565  
0 0 0 0 0 1 0 2 1 0 0 0 0 0 0 2.7752  
0 0 1 0 0 0 0 2 0 0 0 0 1 0 0 -2.873705  
0 0 1 0 0 0 0 2 0 0 1 0 0 0 0 1.54396  
0 0 1 0 0 0 0 2 1 0 0 0 0 0 0 1.96568  
0 0 1 0 0 1 0 2 0 0 0 0 0 0 0 3.980305  
0 0 0 1 0 0 0 0 0 0 0 0 2 1 0 -0.76584  
0 0 0 1 0 0 0 0 0 0 2 0 0 1 0 4.05123  
0 0 0 1 0 0 0 0 2 0 0 0 0 1 0 -0.344725  
0 0 0 1 0 2 0 0 0 0 0 0 0 1 0 -0.596625  
0 0 2 1 0 0 0 0 0 0 0 0 0 1 0 -0.853955  
0 0 0 1 0 0 0 1 0 0 0 0 2 0 0 0.057495  
0 0 0 1 0 0 0 1 0 0 2 0 0 0 0 -8.988605  
0 0 0 1 0 0 0 1 2 0 0 0 0 0 0 -0.28883  
0 0 0 1 0 2 0 1 0 0 0 0 0 0 0 8.7671  
0 0 2 1 0 0 0 1 0 0 0 0 0 0 0 -3.89665  
0 0 0 1 0 0 0 1 0 0 0 0 0 2 0 0.08319  
0 0 0 1 0 0 0 2 0 0 0 0 0 1 0 -0.709555  
0 0 0 2 0 0 0 0 0 0 1 0 1 0 0 -0.95379  
0 0 0 2 0 0 0 0 1 0 0 0 1 0 0 2.416185  
0 0 0 2 0 0 0 0 1 0 1 0 0 0 0 -5.23831  
0 0 0 2 0 1 0 0 0 0 0 0 1 0 0 -0.807035  
0 0 0 2 0 1 0 0 0 0 1 0 0 0 0 -11.01553  
0 0 0 2 0 1 0 0 1 0 0 0 0 0 0 16.599305  
0 0 1 2 0 0 0 0 0 0 0 0 1 0 0 2.513205  
0 0 1 2 0 0 0 0 0 0 1 0 0 0 0 -2.752355  
0 0 1 2 0 0 0 0 1 0 0 0 0 0 0 6.058305  
0 0 1 2 0 1 0 0 0 0 0 0 0 0 0 9.605395  
0 0 0 2 0 0 0 1 0 0 0 0 0 1 0 1.737975  
0 0 0 0 0 0 0 0 0 0 1 0 1 0 2 -8.83251  
0 0 0 0 0 0 0 0 1 0 0 0 1 0 2 5.588535  
0 0 0 0 0 0 0 0 1 0 1 0 0 0 2 13.032895  
0 0 0 0 0 1 0 0 0 0 0 0 1 0 2 0.587695  
0 0 0 0 0 1 0 0 0 0 1 0 0 0 2 -6.47931  
0 0 0 0 0 1 0 0 1 0 0 0 0 0 2 -26.941745  
0 0 1 0 0 0 0 0 0 0 0 0 1 0 2 -2.595635  
0 0 1 0 0 0 0 0 0 0 1 0 0 0 2 0.37383  
0 0 1 0 0 0 0 0 1 0 0 0 0 0 2 -7.295215  
0 0 1 0 0 1 0 0 0 0 0 0 0 0 2 -18.62337  
0 0 0 0 0 0 0 1 0 0 0 0 0 1 2 11.2306  
0 0 0 1 0 0 0 0 0 0 0 0 0 1 2 -7.74697  
0 0 0 1 0 0 0 1 0 0 0 0 0 0 2 -0.37362  
0 0 0 0 0 0 1 0 0 0 0 0 2 0 1 -1.769305  
0 0 0 0 0 0 1 0 0 0 2 0 0 0 1 6.13034  
0 0 0 0 0 0 1 0 2 0 0 0 0 0 1 -0.800485  
0 0 0 0 0 2 1 0 0 0 0 0 0 0 1 1.268655  
0 0 2 0 0 0 1 0 0 0 0 0 0 0 1 -1.233765  
0 0 0 0 0 0 1 0 0 0 0 0 0 2 1 -12.656175  
0 0 0 0 0 0 1 2 0 0 0 0 0 0 1 -2.30791  
0 0 0 2 0 0 1 0 0 0 0 0 0 0 1 -1.46938  
0 0 0 0 0 0 2 0 0 0 1 0 1 0 0 -1.20046  
0 0 0 0 0 0 2 0 1 0 0 0 1 0 0 2.41903  
0 0 0 0 0 0 2 0 1 0 1 0 0 0 0 -6.918555



0 0 0 0 0 1 2 0 0 0 0 0 1 0 0 -1.451545  
0 0 0 0 0 1 2 0 0 0 1 0 0 0 0 -7.610465  
0 0 0 0 0 1 2 0 1 0 0 0 0 0 0 8.89064  
0 0 1 0 0 0 2 0 0 0 0 0 1 0 0 4.57622  
0 0 1 0 0 0 2 0 0 0 1 0 0 0 0 -3.406865  
0 0 1 0 0 0 2 0 1 0 0 0 0 0 0 4.07878  
0 0 1 0 0 1 2 0 0 0 0 0 0 0 0 5.65838  
0 0 0 0 0 0 2 1 0 0 0 0 0 1 0 1.90058  
0 0 0 1 0 0 2 0 0 0 0 0 0 1 0 -1.0897  
0 0 0 1 0 0 2 1 0 0 0 0 0 0 0 -13.4443  
1 0 0 0 0 0 0 0 0 0 0 0 0 2 0 1 -8.47221  
1 0 0 0 0 0 0 0 0 0 0 2 0 0 0 1 -4.92064  
1 0 0 0 0 0 0 0 0 2 0 0 0 0 0 1 0.66966  
1 0 0 0 0 2 0 0 0 0 0 0 0 0 0 1 -1.34876  
1 0 2 0 0 0 0 0 0 0 0 0 0 0 0 1 0.4266  
1 0 0 0 0 0 0 0 0 0 0 0 0 0 2 1 6.20746  
1 0 0 0 0 0 0 2 0 0 0 0 0 0 0 1 8.5729  
1 0 0 2 0 0 0 0 0 0 0 0 0 0 0 1 4.1962  
1 0 0 0 0 0 1 0 0 0 0 0 2 0 0 6.811405  
1 0 0 0 0 0 1 0 0 0 2 0 0 0 0 -17.907565  
1 0 0 0 0 0 1 0 2 0 0 0 0 0 0 0.076955  
1 0 0 0 0 2 1 0 0 0 0 0 0 0 0 11.151295  
1 0 2 0 0 0 1 0 0 0 0 0 0 0 0 -2.75766  
1 0 0 0 0 0 1 0 0 0 0 0 0 2 0 7.378405  
1 0 0 0 0 0 1 2 0 0 0 0 0 0 0 -14.448555  
1 0 0 2 0 0 1 0 0 0 0 0 0 0 0 10.31328  
1 0 0 0 0 0 1 0 0 0 0 0 0 0 2 6.939085  
1 0 0 0 0 0 2 0 0 0 0 0 0 0 1 3.322075  
2 0 0 0 0 0 0 0 0 0 0 1 0 1 0 0 -9.70805  
2 0 0 0 0 0 0 0 1 0 1 0 0 0 0 2.62961  
2 0 0 0 0 1 0 0 0 0 0 0 0 1 0 0 -8.52809  
2 0 0 0 0 1 0 0 0 0 1 0 0 0 0 27.90882  
2 0 0 0 0 1 0 0 1 0 0 0 0 0 0 12.017555  
2 0 1 0 0 0 0 0 0 0 0 0 0 1 0 0 -0.473315  
2 0 1 0 0 0 0 0 0 0 0 1 0 0 0 0 7.14191  
2 0 1 0 0 0 0 0 1 0 0 0 0 0 0 0.29202  
2 0 1 0 0 1 0 0 0 0 0 0 0 0 0 13.886175  
2 0 0 0 0 0 0 1 0 0 0 0 0 1 0 11.816305  
2 0 0 1 0 0 0 0 0 0 0 0 0 0 1 0 4.29175  
2 0 0 1 0 0 0 1 0 0 0 0 0 0 0 15.267495  
2 0 0 0 0 0 1 0 0 0 0 0 0 0 1 -0.53167  
0 0 0 0 0 0 0 0 0 0 0 1 2 1 0 0 1.87095  
0 0 0 0 0 0 0 0 1 0 0 2 1 0 0 2.651315  
0 0 0 0 0 0 0 0 1 0 1 2 0 0 0 10.54081  
0 0 0 0 0 1 0 0 0 0 0 2 1 0 0 1.19016  
0 0 0 0 0 1 0 0 0 0 1 2 0 0 0 -4.86637  
0 0 0 0 0 1 0 0 1 0 0 2 0 0 0 -24.48267  
0 0 1 0 0 0 0 0 0 0 0 2 1 0 0 -2.26118  
0 0 1 0 0 0 0 0 0 0 1 2 0 0 0 0.261165  
0 0 1 0 0 0 0 0 1 0 0 2 0 0 0 -6.40589  
0 0 1 0 0 1 0 0 0 0 0 2 0 0 0 -17.270205  
0 0 0 0 0 0 0 1 0 0 0 2 0 1 0 -0.87204  
0 0 0 1 0 0 0 0 0 0 0 2 0 1 0 -0.863375  
0 0 0 1 0 0 0 1 0 0 0 2 0 0 0 0.036625  
0 0 0 0 0 0 1 0 0 0 0 2 0 0 1 -2.34747  
1 0 0 0 0 0 0 0 0 0 0 2 0 0 1 -7.62915  
1 0 0 0 0 0 1 0 0 0 0 2 0 0 0 7.15404  
0 0 0 0 0 0 0 0 0 1 0 1 2 0 0 -1.143195  
0 0 0 0 0 0 0 0 0 1 2 1 0 0 0 -9.09347  
0 0 0 0 0 0 0 0 2 1 0 1 0 0 0 -0.337285  
0 0 0 0 0 2 0 0 0 1 0 1 0 0 0 -7.778015  
0 0 2 0 0 0 0 0 0 1 0 1 0 0 0 0.546445  
0 0 0 0 0 0 0 0 0 1 0 1 0 2 0 11.413565  
0 0 0 0 0 0 0 2 0 1 0 1 0 0 0 5.0698  
0 0 0 2 0 0 0 0 0 1 0 1 0 0 0 2.159025  
0 0 0 0 0 0 0 0 0 1 0 1 0 0 2 10.77547  
0 0 0 0 0 0 2 0 0 1 0 1 0 0 0 1.98102

2 0 0 0 0 0 0 0 0 0 1 0 1 0 0 0 9.47994  
0 0 0 0 0 0 0 0 0 0 2 1 0 1 0 0 9.191405  
0 0 0 0 0 0 0 0 0 1 2 0 0 1 0 0 -1.091555  
0 0 0 0 0 0 0 0 0 1 2 1 0 0 0 0 -1.640495  
0 0 0 0 0 1 0 0 0 2 0 0 1 0 0 0 0.81287  
0 0 0 0 0 1 0 0 0 2 1 0 0 0 0 0 0.67656  
0 0 0 0 0 1 0 0 1 2 0 0 0 0 0 0 1.910875  
0 0 1 0 0 0 0 0 0 2 0 0 1 0 0 0 1.280365  
0 0 1 0 0 0 0 0 0 2 1 0 0 0 0 0 -1.08706  
0 0 1 0 0 0 0 0 0 1 2 0 0 0 0 0 1.048295  
0 0 1 0 0 1 0 0 0 2 0 0 0 0 0 0 0.835775  
0 0 0 0 0 0 0 1 0 2 0 0 0 0 1 0 -5.845025  
0 0 0 1 0 0 0 0 0 2 0 0 0 1 0 0 4.18274  
0 0 0 1 0 0 0 1 0 2 0 0 0 0 0 0 -9.815685  
0 0 0 0 0 0 1 0 0 2 0 0 0 0 1 0 6.196385  
1 0 0 0 0 0 0 0 0 2 0 0 0 0 1 0 -5.578155  
1 0 0 0 0 0 1 0 0 2 0 0 0 0 0 0 -17.67532  
0 0 0 0 1 0 0 0 0 0 0 1 2 0 0 0 -0.95945  
0 0 0 0 1 0 0 0 0 0 2 1 0 0 0 0 -1.238845  
0 0 0 0 1 0 0 0 2 0 0 1 0 0 0 0 0.524375  
0 0 0 0 1 2 0 0 0 0 0 1 0 0 0 0 -1.80662  
0 0 2 0 1 0 0 0 0 0 0 1 0 0 0 0 -0.47509  
0 0 0 0 1 0 0 0 0 0 0 1 0 2 0 0 0.04288  
0 0 0 0 1 0 0 2 0 0 0 1 0 0 0 0 2.047085  
0 0 0 2 1 0 0 0 0 0 0 0 1 0 0 0 -1.80553  
0 0 0 0 1 0 0 0 0 0 0 0 1 0 0 2 -1.203925  
0 0 0 0 1 0 2 0 0 0 0 0 1 0 0 0 -2.049875  
2 0 0 0 1 0 0 0 0 0 0 0 1 0 0 0 7.51129  
0 0 0 0 1 0 0 0 0 0 1 0 0 2 0 0 -1.65624  
0 0 0 0 1 0 0 0 0 0 1 2 0 0 0 0 0.97215  
0 0 0 0 1 0 0 0 2 1 0 0 0 0 0 0 -1.506235  
0 0 0 0 1 2 0 0 0 0 1 0 0 0 0 0 0.087065  
0 0 2 0 1 0 0 0 0 0 1 0 0 0 0 0 0.422795  
0 0 0 0 1 0 0 0 0 0 1 0 0 0 2 0 -2.473675  
0 0 0 0 1 0 0 2 0 1 0 0 0 0 0 0 7.93492  
0 0 0 2 1 0 0 0 0 0 1 0 0 0 0 0 -12.62868  
0 0 0 0 1 0 0 0 0 0 1 0 0 0 0 2 -2.24754  
0 0 0 0 1 0 2 0 0 0 1 0 0 0 0 0 -10.771645  
2 0 0 0 1 0 0 0 0 0 1 0 0 0 0 0 24.9425  
0 0 0 0 1 0 0 0 0 0 1 0 2 0 0 0 -1.55233  
0 0 0 0 1 0 0 0 0 2 0 1 0 0 0 0 -1.242925  
0 0 0 0 2 0 0 0 0 0 0 1 0 1 0 0 6.99253  
0 0 0 0 2 0 0 0 0 1 0 0 0 1 0 0 -0.551525  
0 0 0 0 2 0 0 0 0 1 0 1 0 0 0 0 -1.88215  
0 0 0 0 2 1 0 0 0 0 0 0 0 1 0 0 1.26411  
0 0 0 0 2 1 0 0 1 0 0 0 0 0 0 0 18.236035  
0 0 1 0 2 0 0 0 0 0 0 0 0 1 0 0 1.117155  
0 0 1 0 2 0 0 0 0 1 0 0 0 0 0 0 5.460375  
0 0 1 0 2 1 0 0 0 0 0 0 0 0 0 0 14.06757  
0 0 0 1 2 0 0 0 0 0 0 0 0 0 1 0 -1.318335  
0 0 0 1 2 0 0 1 0 0 0 0 0 0 0 0 10.65891  
0 0 0 0 2 0 1 0 0 0 0 0 0 0 0 1 -0.559385  
1 0 0 0 2 0 0 0 0 0 0 0 0 0 0 1 0.32358  
1 0 0 0 2 0 1 0 0 0 0 0 0 0 0 0 13.537635  
0 0 0 0 2 0 0 0 0 0 1 0 1 0 0 0 -6.18428  
0 1 0 0 0 0 0 0 0 0 0 0 0 1 2 0 0 5.220665  
0 1 0 0 0 0 0 0 0 0 0 2 1 0 0 0 -4.180795  
0 1 0 0 0 0 0 0 2 0 0 1 0 0 0 0 -2.17687  
0 1 0 0 0 2 0 0 0 0 0 0 1 0 0 0 -5.188565  
0 1 2 0 0 0 0 0 0 0 0 0 1 0 0 0 -0.250485  
0 1 0 0 0 0 0 0 0 0 0 0 1 0 2 0 7.039265  
0 1 0 0 0 0 0 2 0 0 0 0 1 0 0 0 -2.9569  
0 1 0 2 0 0 0 0 0 0 0 0 0 1 0 0 0 -7.94524  
0 1 0 0 0 0 0 0 0 0 0 0 0 1 0 0 2 7.24887  
0 1 0 0 0 0 2 0 0 0 0 0 1 0 0 0 -6.268485  
2 1 0 0 0 0 0 0 0 0 0 0 0 1 0 0 0 -6.661155  
0 1 0 0 0 0 0 0 0 0 1 0 0 2 0 0 -7.851145

```

0 1 0 0 0 0 0 0 0 1 2 0 0 0 0 2.43384
0 1 0 0 0 0 0 0 2 1 0 0 0 0 0 0.641405
0 1 0 0 0 2 0 0 0 1 0 0 0 0 0 0.76277
0 1 2 0 0 0 0 0 0 1 0 0 0 0 0 0.98494
0 1 0 0 0 0 0 0 0 1 0 0 0 2 0 -9.904185
0 1 0 0 0 0 0 2 0 1 0 0 0 0 0 1.65266
0 1 0 2 0 0 0 0 0 1 0 0 0 0 0 5.160055
0 1 0 0 0 0 0 0 0 1 0 0 0 0 2 -9.81408
0 1 0 0 0 0 2 0 0 1 0 0 0 0 0 5.265435
2 1 0 0 0 0 0 0 0 1 0 0 0 0 0 -0.747245
0 1 0 0 0 0 0 0 0 1 0 2 0 0 0 -7.83967
0 1 0 0 0 0 0 0 0 2 0 1 0 0 0 -4.77056
0 1 0 0 1 0 0 0 0 0 0 0 2 0 0 21.08249
0 1 0 0 1 0 0 0 0 0 2 0 0 0 0 -2.225555
0 1 0 0 1 0 0 0 2 0 0 0 0 0 0 -0.12614
0 1 0 0 1 2 0 0 0 0 0 0 0 0 0 -15.074675
0 1 2 0 1 0 0 0 0 0 0 0 0 0 0 1.131915
0 1 0 0 1 0 0 0 0 0 0 0 0 2 0 23.128805
0 1 0 0 1 0 0 2 0 0 0 0 0 0 0 -2.875325
0 1 0 2 1 0 0 0 0 0 0 0 0 0 0 -16.274845
0 1 0 0 1 0 0 0 0 0 0 0 0 0 2 22.495895
0 1 0 0 1 0 2 0 0 0 0 0 0 0 0 -7.097315
2 1 0 0 1 0 0 0 0 0 0 0 0 0 0 -9.79327
0 1 0 0 1 0 0 0 0 0 0 2 0 0 0 20.708735
0 1 0 0 1 0 0 0 0 2 0 0 0 0 0 -3.073725
0 1 0 0 2 0 0 0 0 0 0 1 0 0 0 -6.939575
0 1 0 0 2 0 0 0 0 1 0 0 0 0 0 0.13003
0 2 0 0 0 0 0 0 0 0 1 0 1 0 0 2.00631
0 2 0 0 0 0 0 0 1 0 0 0 1 0 0 -0.581425
0 2 0 0 0 0 0 0 1 0 1 0 0 0 0 2.46956
0 2 0 0 0 1 0 0 0 0 0 0 0 1 0 0 -1.8088
0 2 0 0 0 1 0 0 0 0 0 1 0 0 0 0 -7.95294
0 2 0 0 0 1 0 0 1 0 0 0 0 0 0 -8.663885
0 2 1 0 0 0 0 0 0 0 0 0 0 1 0 0 -2.54274
0 2 1 0 0 0 0 0 0 0 0 1 0 0 0 0 11.98546
0 2 1 0 0 0 0 0 1 0 0 0 0 0 0 18.693195
0 2 1 0 0 1 0 0 0 0 0 0 0 0 0 -14.038835
0 2 0 0 0 0 0 1 0 0 0 0 0 0 1 0 1.34536
0 2 0 1 0 0 0 0 0 0 0 0 0 0 1 0 4.315975
0 2 0 1 0 0 0 1 0 0 0 0 0 0 0 0 -2.82314
0 2 0 0 0 0 1 0 0 0 0 0 0 0 0 1 2.7216
1 2 0 0 0 0 0 0 0 0 0 0 0 0 0 1 2.50127
1 2 0 0 0 0 1 0 0 0 0 0 0 0 0 0 0.19445
0 2 0 0 0 0 0 0 0 0 1 0 1 0 0 0 -1.39684
0 2 0 0 1 0 0 0 0 0 0 0 1 0 0 0 2.41141
0 2 0 0 1 0 0 0 0 0 1 0 0 0 0 0 -1.846775

```

**Listing 2** C<sub>2</sub>H<sub>4</sub>O: Coriolis coefficients at the b3lyp/6-31+G\*\* level of theory<sup>1</sup>

Coriolis coeffs C2H4O – B3LYP/6–31+G(d,p) – (Sorted By energy)

815.515 850.1797 899.5641 1052.2312 1156.8024 1157.9059 1174.993 1176.0453 1300.1081 1512.35

1549.0739 3109.4584 3117.8766 3196.5601 3211.2649

0.8502093948314251 0.7349746908278225 0.4693523020088895

29 54 54

```

0 11 12 0.001070
0 10 11 -0.036180
0 9 12 0.028820
0 9 10 -0.009820
0 8 11 0.196360
0 8 9 -0.285560
0 5 12 -0.516580
0 5 10 -0.811620
0 5 8 0.082160
0 4 11 0.484060
0 4 9 -0.747980
0 4 5 -0.039700
0 2 11 0.119180
0 2 9 -0.269670

```

|   |    |    |           |
|---|----|----|-----------|
| 0 | 2  | 5  | 0.253690  |
| 0 | 1  | 12 | -0.141260 |
| 0 | 1  | 10 | -0.230870 |
| 0 | 1  | 8  | -0.265630 |
| 0 | 1  | 4  | -0.195890 |
| 0 | 1  | 2  | 0.903590  |
| 0 | 13 | 14 | -0.008520 |
| 0 | 7  | 14 | -0.157230 |
| 0 | 6  | 13 | 0.315120  |
| 0 | 6  | 7  | -0.654180 |
| 0 | 3  | 14 | -0.474770 |
| 0 | 3  | 6  | 0.336460  |
| 0 | 0  | 13 | -0.331830 |
| 0 | 0  | 7  | 0.274350  |
| 0 | 0  | 3  | -0.792340 |
| 1 | 14 | 12 | -0.014390 |
| 1 | 14 | 11 | 0.026770  |
| 1 | 14 | 10 | -0.204250 |
| 1 | 14 | 9  | -0.779810 |
| 1 | 14 | 8  | 0.185620  |
| 1 | 14 | 5  | -0.324250 |
| 1 | 14 | 4  | 0.348360  |
| 1 | 14 | 2  | 0.074530  |
| 1 | 14 | 1  | 0.016590  |
| 1 | 13 | 12 | 0.043470  |
| 1 | 13 | 11 | -0.007450 |
| 1 | 13 | 10 | 0.760140  |
| 1 | 13 | 9  | 0.208560  |
| 1 | 13 | 8  | -0.040860 |
| 1 | 13 | 5  | -0.380270 |
| 1 | 13 | 4  | 0.357620  |
| 1 | 13 | 2  | 0.060040  |
| 1 | 13 | 1  | -0.114750 |
| 1 | 7  | 12 | -0.762250 |
| 1 | 7  | 11 | 0.018270  |
| 1 | 7  | 10 | 0.033300  |
| 1 | 7  | 9  | -0.072880 |
| 1 | 7  | 8  | -0.354770 |
| 1 | 7  | 5  | -0.174900 |
| 1 | 7  | 4  | 0.028710  |
| 1 | 7  | 2  | -0.164330 |
| 1 | 7  | 1  | -0.208730 |
| 1 | 6  | 12 | 0.378100  |
| 1 | 6  | 11 | -0.353970 |
| 1 | 6  | 10 | -0.135460 |
| 1 | 6  | 9  | 0.040420  |
| 1 | 6  | 8  | 0.053820  |
| 1 | 6  | 5  | -0.201100 |
| 1 | 6  | 4  | 0.231770  |
| 1 | 6  | 2  | -0.143110 |
| 1 | 6  | 1  | 0.222220  |
| 1 | 3  | 12 | 0.044240  |
| 1 | 3  | 11 | -0.442390 |
| 1 | 3  | 10 | 0.139680  |
| 1 | 3  | 9  | -0.236490 |
| 1 | 3  | 8  | 0.009240  |
| 1 | 3  | 5  | -0.100630 |
| 1 | 3  | 4  | 0.067820  |
| 1 | 3  | 2  | -0.003360 |
| 1 | 3  | 1  | 0.012180  |
| 1 | 0  | 12 | -0.130620 |
| 1 | 0  | 11 | -0.762440 |
| 1 | 0  | 10 | 0.167260  |
| 1 | 0  | 9  | -0.121610 |
| 1 | 0  | 8  | -0.126560 |
| 1 | 0  | 5  | 0.069490  |
| 1 | 0  | 4  | -0.115270 |



|                                 |                   |                    |                    |
|---------------------------------|-------------------|--------------------|--------------------|
| 0 0 0 0 0 1 0 0 0 0 0 0 0 0 0 0 | 0.0               | -0.0108060767511   | 0.0                |
| 0 0 0 0 0 0 0 0 0 1 0 0 0 0 0 0 | 0.0               | 0.0                | 0.036733780577     |
| 0 0 0 0 0 0 0 0 0 0 0 0 1 0 0 0 | 0.0               | -0.0383472987167   | 0.0                |
| 0 0 0 0 0 0 0 0 0 0 0 0 0 1 0 0 | 0.0               | 0.0                | 0.0241543080259    |
| 1 0 0 0 0 0 0 0 0 0 0 0 0 0 0 0 | 0.00492000496117  | 0.0                | 0.0                |
| 0 0 1 0 0 0 0 0 0 0 0 0 0 0 0 0 | 0.0               | 0.0                | 0.103356810916     |
| 0 0 0 0 0 0 1 0 0 0 0 0 0 0 0 0 | -0.0193464355704  | 0.0                | 0.0                |
| 0 0 0 0 0 0 0 0 0 2 0 0 0 0 0 0 | 0.0               | 0.0                | 0.00129033957098   |
| 0 0 0 0 0 0 0 0 0 0 0 0 2 0 0 0 | 0.0               | 0.0                | 0.00195257048051   |
| 0 0 0 0 0 0 0 0 0 0 0 0 0 0 0 2 | 0.0               | 0.0                | 0.00326125655798   |
| 0 0 0 0 2 0 0 0 0 0 0 0 0 0 0 0 | 0.0               | 0.0                | 0.00264687081535   |
| 0 0 0 2 0 0 0 0 0 0 0 0 0 0 0 0 | 0.0               | 0.0                | 0.00320476871589   |
| 0 0 0 0 0 0 0 0 0 0 0 0 0 0 2 0 | 0.0               | 0.0                | 0.00335925444643   |
| 0 2 0 0 0 0 0 0 0 0 0 0 0 0 0 0 | 0.0               | 0.0                | 0.00400504575693   |
| 0 0 0 0 0 0 0 2 0 0 0 0 0 0 0 0 | 0.0               | 0.0                | 0.000560700592716  |
| 0 0 0 0 0 0 0 0 0 0 0 0 2 0 0 0 | 0.0               | 0.0                | 0.00205796816113   |
| 0 0 0 0 0 0 0 0 0 0 0 2 0 0 0 0 | 0.0               | 0.0                | 0.00162436185962   |
| 0 0 0 0 0 0 0 0 2 0 0 0 0 0 0 0 | 0.0               | 0.0                | 0.00167111082166   |
| 2 0 0 0 0 0 0 0 0 0 0 0 0 0 0 0 | 0.0               | 0.0                | 0.00477471059091   |
| 0 0 0 0 0 0 2 0 0 0 0 0 0 0 0 0 | 0.0               | 0.0                | 0.00193612052245   |
| 0 0 2 0 0 0 0 0 0 0 0 0 0 0 0 0 | 0.0               | 0.0                | 0.00161905204412   |
| 0 0 0 0 0 2 0 0 0 0 0 0 0 0 0 0 | 0.0               | 0.0                | 0.00587093416056   |
| 0 0 0 0 0 0 1 0 1 0 0 0 0 0 0 0 | -0.00333413472407 | 0.0                | 0.0                |
| 0 0 0 0 0 1 0 1 0 0 0 0 0 0 0 0 | -0.00512344597261 | 0.0                | 0.0                |
| 0 0 0 0 0 1 0 0 0 0 0 0 0 0 1 0 | 0.0010462191767   | 0.0                | 0.0                |
| 1 0 0 0 0 0 0 0 0 0 0 0 0 0 1 0 | 0.0               | -0.00151529405964  | 0.0                |
| 0 1 0 0 0 0 0 0 0 0 0 1 0 0 0 0 | 0.0               | -0.0071457865928   | 0.0                |
| 0 0 1 0 0 0 0 0 0 0 0 0 1 0 0 0 | 0.0               | -0.00115073602622  | 0.0                |
| 0 0 0 0 0 0 0 0 0 0 0 0 1 0 1 0 | -0.0117864431804  | 0.0                | 0.0                |
| 0 0 0 0 0 0 1 0 0 0 0 0 0 0 0 1 | 0.0               | 0.0                | 0.000855679674636  |
| 0 1 0 0 0 1 0 0 0 0 0 0 0 0 0 0 | 0.0               | 0.0                | 0.00857807003271   |
| 0 0 0 0 0 0 0 1 0 0 0 1 0 0 0 0 | -0.00647954151561 | 0.0                | 0.0                |
| 0 0 1 0 0 0 0 0 1 0 0 0 0 0 0 0 | 0.0               | 0.0                | 0.0038775013098    |
| 0 0 0 0 0 0 0 0 0 1 0 0 1 0 0 0 | 0.0               | 0.00348087027729   | 0.0                |
| 0 0 1 0 0 0 0 0 0 0 0 1 0 0 0 0 | 0.0               | 0.0                | -0.000626084480344 |
| 0 0 0 0 0 0 0 0 1 0 1 0 0 0 0 0 | 0.0               | 0.0                | -0.00192770756467  |
| 0 0 0 0 0 0 1 1 0 0 0 0 0 0 0 0 | 0.0               | 0.00223986319154   | 0.0                |
| 0 1 0 0 0 0 0 0 0 0 0 0 1 0 0 0 | 0.0               | 0.0                | 0.00556914833465   |
| 1 0 0 0 0 0 0 1 0 0 0 0 0 0 0 0 | 0.0               | -0.00365944509447  | 0.0                |
| 0 0 0 0 0 0 0 1 0 0 0 0 0 0 0 1 | 0.0               | -0.00513777781571  | 0.0                |
| 0 0 0 0 0 0 0 1 0 1 0 0 0 0 0 0 | -0.00803254299797 | 0.0                | 0.0                |
| 0 0 1 0 0 0 0 0 0 0 0 0 0 0 0 1 | -0.00279129666788 | 0.0                | 0.0                |
| 0 0 0 0 0 0 0 0 0 0 0 1 0 1 0 0 | 0.0               | 0.0                | 0.000844570728711  |
| 0 0 0 0 0 0 0 0 0 0 0 0 0 0 1 1 | 0.0               | -0.0129726315593   | 0.0                |
| 0 0 0 0 0 0 0 0 0 1 0 1 0 0 0 0 | 0.0               | 0.0                | -0.000305248342634 |
| 0 0 1 0 0 0 1 0 0 0 0 0 0 0 0 0 | -0.00428386139094 | 0.0                | 0.0                |
| 1 0 0 1 0 0 0 0 0 0 0 0 0 0 0 0 | 0.0               | -0.0060695763062   | 0.0                |
| 0 0 0 1 0 0 0 0 0 0 0 0 0 0 0 1 | 0.0               | -0.000118918860629 | 0.0                |
| 0 1 0 0 0 0 0 1 0 0 0 0 0 0 0 0 | -0.00217639408584 | 0.0                | 0.0                |
| 0 0 0 1 0 0 0 0 0 1 0 0 0 0 0 0 | 0.00260786534719  | 0.0                | 0.0                |
| 0 0 0 0 0 1 0 0 0 0 1 0 0 0 0 0 | 0.0               | 0.0                | -0.00441582638731  |
| 0 0 0 1 0 0 1 0 0 0 0 0 0 0 0 0 | 0.0               | 0.00842485444406   | 0.0                |
| 0 0 0 1 0 0 0 0 0 0 0 0 1 0 0 0 | -0.00109302764605 | 0.0                | 0.0                |
| 0 1 0 0 1 0 0 0 0 0 0 0 0 0 0 0 | 0.0               | -0.000972495280821 | 0.0                |
| 1 0 0 0 0 0 1 0 0 0 0 0 0 0 0 0 | 0.0               | 0.0                | -0.00321754790796  |
| 0 0 0 0 0 0 0 0 0 0 1 0 0 0 1 0 | 0.0105983031844   | 0.0                | 0.0                |
| 0 0 1 0 0 0 0 0 0 0 0 0 0 1 0 0 | 0.0               | 0.0                | 0.000910040973248  |
| 0 0 0 0 0 0 0 0 0 1 1 0 0 0 0 0 | 0.0               | -0.00201115381798  | 0.0                |
| 0 0 1 0 0 1 0 0 0 0 0 0 0 0 0 0 | 0.0               | 0.011853742171     | 0.0                |
| 0 1 1 0 0 0 0 0 0 0 0 0 0 0 0 0 | 0.0               | 0.00325702914547   | 0.0                |
| 0 0 0 1 0 1 0 0 0 0 0 0 0 0 0 0 | -0.00914843751789 | 0.0                | 0.0                |
| 0 0 0 0 0 0 0 0 0 0 0 0 0 1 0 1 | -0.00977672686204 | 0.0                | 0.0                |
| 0 1 0 0 0 0 0 0 0 0 0 1 0 0 0 0 | 0.0               | 0.0                | -0.00153591485592  |
| 0 0 1 0 1 0 0 0 0 0 0 0 0 0 0 0 | 0.0               | 0.0                | 0.00444971906877   |
| 0 0 0 0 0 0 0 0 1 0 0 1 0 0 0 0 | 0.0               | -0.0034809430435   | 0.0                |
| 0 1 0 1 0 0 0 0 0 0 0 0 0 0 0 0 | -0.00315328930911 | 0.0                | 0.0                |
| 0 0 0 0 0 0 1 0 0 0 1 0 0 0 0 0 | 0.00554428187047  | 0.0                | 0.0                |











|                                                         |          |
|---------------------------------------------------------|----------|
| 0 0 0 0 0 0 0 0 0 0 0 0 1 0 0 1 0 0 0 0 0 0 0 0 1 0     | 120.252  |
| 0 0 0 0 0 0 0 0 0 0 1 0 1 0 0 0 0 0 0 0 0 0 0 0 1 0     | 49.617   |
| 0 0 1 0 0 0 0 0 0 0 0 0 1 0 0 0 0 0 0 0 0 0 0 0 1 0     | -72.344  |
| 0 0 0 0 0 0 0 0 0 0 0 0 1 0 0 0 0 0 1 0 0 0 0 0 0 1     | 105.634  |
| 0 0 0 0 0 0 0 0 0 0 0 0 1 0 0 0 0 0 1 0 0 1 0 0 0 0     | 85.589   |
| 0 0 0 0 0 0 0 0 0 0 0 0 1 0 0 1 0 1 0 0 0 0 0 0 0 0     | 23.434   |
| 0 0 0 0 0 0 0 0 0 0 1 0 1 0 0 0 0 0 1 0 0 0 0 0 0 0     | 52.718   |
| 0 0 1 0 0 0 0 0 0 0 0 0 1 0 0 0 0 0 1 0 0 0 0 0 0 0     | 40.576   |
| 0 0 0 0 0 0 0 0 0 0 0 0 1 0 1 0 0 0 0 0 0 0 0 0 0 1     | -27.03   |
| 0 0 0 0 0 0 0 0 0 0 0 0 1 0 1 0 0 0 0 0 0 1 0 0 0 0     | -153.014 |
| 0 0 0 0 0 0 0 0 0 0 0 0 1 0 1 1 0 0 0 0 0 0 0 0 0 0     | -68.463  |
| 0 0 0 0 0 0 0 0 0 0 1 0 1 0 1 0 0 0 0 0 0 0 0 0 0 0     | -30.89   |
| 0 0 1 0 0 0 0 0 0 0 0 0 1 0 1 0 0 0 0 0 0 0 0 0 0 0     | 3.231    |
| 0 0 0 0 0 0 1 1 0 0 0 0 0 0 0 0 0 0 0 0 0 0 1 0 0 0     | 393.418  |
| 0 0 0 0 1 0 1 0 0 0 0 0 0 0 0 0 0 0 0 0 0 0 1 0 0 0     | 97.061   |
| 0 0 0 0 0 0 0 0 0 0 0 0 0 0 0 0 0 0 0 0 0 0 1 1 1 0     | -998.478 |
| 0 0 0 0 0 0 0 0 0 0 0 0 0 0 0 0 0 0 0 1 0 0 1 0 1 0     | 6.248    |
| 0 0 0 0 0 0 0 0 0 0 0 1 0 0 0 0 0 0 0 0 0 0 1 0 1 0     | -5.1     |
| 0 0 0 0 0 0 0 0 0 0 0 0 0 0 0 0 0 0 0 1 0 0 0 1 1 0 0   | 34.332   |
| 0 0 0 0 0 0 0 0 0 0 0 0 0 0 0 0 0 0 1 1 0 0 1 0 0 0     | 133.92   |
| 0 0 0 0 0 0 0 0 0 0 0 0 0 1 0 0 0 1 0 0 0 1 0 0 0 0     | -90.32   |
| 0 0 0 0 0 0 0 0 0 0 0 1 0 0 0 0 0 1 0 0 0 1 0 0 0 0     | 46.924   |
| 0 0 0 0 0 0 0 0 0 0 0 0 0 0 1 0 0 0 0 0 0 0 1 1 0 0     | -30.913  |
| 0 0 0 0 0 0 0 0 0 0 0 0 0 0 1 0 0 0 1 0 0 1 0 0 0 0     | -56.624  |
| 0 0 0 0 0 0 0 0 0 0 0 0 0 1 1 0 0 0 0 0 0 0 1 0 0 0     | 30.556   |
| 0 0 0 0 0 0 0 0 0 0 0 1 0 0 1 0 0 0 0 0 0 0 1 0 0 0     | -13.864  |
| 0 0 0 0 0 0 0 0 0 0 0 0 1 0 0 0 0 0 0 0 0 0 1 1 0 0     | -2.576   |
| 0 0 0 0 0 0 0 0 0 0 0 0 1 0 0 0 0 0 0 1 0 0 1 0 0 0     | 105.384  |
| 0 0 0 0 0 0 0 0 0 0 0 0 1 1 0 0 0 0 0 0 0 0 1 0 0 0     | -93.817  |
| 0 0 0 0 0 0 0 0 0 0 0 1 1 0 0 0 0 0 0 0 0 0 1 0 0 0     | 35.552   |
| 0 0 0 0 0 0 1 1 0 0 0 0 0 0 0 0 0 0 0 0 1 0 0 0 0 0     | 22.862   |
| 0 0 0 0 1 0 1 0 0 0 0 0 0 0 0 0 0 0 0 0 0 1 0 0 0 0     | 8.917    |
| 0 0 0 0 0 0 0 0 0 0 0 0 0 0 0 0 0 0 0 0 0 1 0 0 1 1 0   | -24.843  |
| 0 0 0 0 0 0 0 0 0 0 0 0 0 0 0 0 0 0 0 0 1 1 0 0 0 1 0   | -57.027  |
| 0 0 0 0 0 0 0 0 0 0 0 0 0 0 1 0 0 0 0 0 0 1 0 0 0 1 0   | 44.963   |
| 0 0 0 0 0 0 0 0 0 0 0 0 1 0 0 0 0 0 0 0 0 1 0 0 0 1 0   | -12.259  |
| 0 0 0 0 0 0 0 0 0 0 0 0 0 0 0 0 0 0 0 0 1 0 1 0 0 1 0 0 | -65.876  |
| 0 0 0 0 0 0 0 0 0 0 0 0 0 0 0 0 0 0 0 0 1 1 1 0 0 0 0 0 | -13.932  |
| 0 0 0 0 0 0 0 0 0 0 0 0 0 0 1 0 0 0 0 1 0 1 0 0 0 0 0   | -39.427  |
| 0 0 0 0 0 0 0 0 0 0 0 0 1 0 0 0 0 0 0 1 0 1 0 0 0 0 0   | 48.938   |
| 0 0 0 0 0 0 0 0 0 0 0 0 0 0 1 0 0 0 0 0 1 0 0 1 0 0 0   | 30.357   |
| 0 0 0 0 0 0 0 0 0 0 0 0 0 0 0 0 0 0 0 1 1 0 0 0 0 0 0   | -171.059 |
| 0 0 0 0 0 0 0 0 0 0 0 0 0 0 1 1 0 0 0 0 0 1 0 0 0 0 0 0 | -176.25  |
| 0 0 0 0 0 0 0 0 0 0 0 0 1 0 0 1 0 0 0 0 0 1 0 0 0 0 0 0 | 103.37   |
| 0 0 0 0 0 0 0 0 0 0 0 0 0 1 0 0 0 0 0 0 0 1 0 0 1 0 0 0 | -40.988  |
| 0 0 0 0 0 0 0 0 0 0 0 0 0 1 0 0 0 0 0 0 1 1 0 0 0 0 0 0 | 66.766   |
| 0 0 0 0 0 0 0 0 0 0 0 0 0 1 1 0 0 0 0 0 0 1 0 0 0 0 0 0 | 23.675   |
| 0 0 0 0 0 0 0 0 0 0 0 0 1 1 0 0 0 0 0 0 0 1 0 0 0 0 0 0 | -41.182  |
| 0 0 0 0 0 0 0 0 0 0 0 0 0 0 0 0 0 0 0 0 0 1 0 1 0 0 1   | -24.345  |
| 0 0 0 0 0 0 0 0 0 0 0 0 0 0 0 0 0 0 0 0 0 1 1 1 0 0 0   | 53.334   |
| 0 0 0 0 0 0 0 0 0 0 0 0 0 0 0 0 0 0 1 0 0 0 1 0 1 0 0 0 | -50.492  |
| 0 0 0 0 0 0 0 0 0 0 0 1 0 0 0 0 0 0 0 0 0 1 0 1 0 0 0 0 | -15.032  |
| 0 0 1 0 0 0 0 0 0 0 0 0 0 0 0 0 0 0 0 0 0 1 0 1 0 0 0   | 35.842   |
| 0 0 0 0 0 0 0 1 1 0 0 0 0 0 0 0 0 0 1 0 0 0 0 0 0 0 0   | 8.594    |
| 0 0 0 0 1 0 1 0 0 0 0 0 0 0 0 0 0 0 1 0 0 0 0 0 0 0 0 0 | -1.631   |
| 0 0 0 0 0 0 0 0 0 0 0 0 0 0 0 0 0 0 0 1 0 0 0 0 0 1 1 0 | 2.003    |
| 0 0 0 0 0 0 0 0 0 0 0 0 0 0 0 0 0 0 0 1 0 1 0 0 0 0 1 0 | 146.55   |
| 0 0 0 0 0 0 0 0 0 0 0 0 0 0 0 1 0 0 1 0 0 0 0 0 0 0 1 0 | -112.841 |
| 0 0 0 0 0 0 0 0 0 0 0 0 1 0 0 0 0 0 1 0 0 0 0 0 0 0 1 0 | 52.343   |
| 0 0 0 0 0 0 0 0 0 0 0 0 0 0 0 0 0 0 0 1 1 0 0 0 0 1 0 0 | 150.991  |
| 0 0 0 0 0 0 0 0 0 0 0 0 0 0 0 0 0 0 0 1 1 1 0 0 0 0 0 0 | 1.584    |
| 0 0 0 0 0 0 0 0 0 0 0 0 0 0 1 0 0 1 1 0 0 0 0 0 0 0 0 0 | -57.474  |
| 0 0 0 0 0 0 0 0 0 0 0 0 1 0 0 0 0 0 1 1 0 0 0 0 0 0 0 0 | 7.091    |
| 0 0 0 0 0 0 0 0 0 0 0 0 0 0 0 0 1 0 1 0 0 0 0 0 0 1 0 0 | -58.013  |
| 0 0 0 0 0 0 0 0 0 0 0 0 0 0 0 0 1 0 1 0 1 0 0 0 0 0 0 0 | -32.01   |
| 0 0 0 0 0 0 0 0 0 0 0 0 0 0 0 1 1 0 1 0 0 0 0 0 0 0 0 0 | -53.492  |
| 0 0 0 0 0 0 0 0 0 0 0 0 1 0 0 1 0 1 0 0 0 0 0 0 0 0 0 0 | 30.96    |

|                                                       |          |
|-------------------------------------------------------|----------|
| 0 0 0 0 0 0 0 0 0 0 0 0 1 0 0 0 1 0 0 0 0 0 1 0 0     | 132.805  |
| 0 0 0 0 0 0 0 0 0 0 0 0 1 0 0 0 1 0 1 0 0 0 0 0 0     | -14.53   |
| 0 0 0 0 0 0 0 0 0 0 0 0 1 1 0 0 1 0 0 0 0 0 0 0 0     | -8.826   |
| 0 0 0 0 0 0 0 0 0 0 0 0 1 1 0 0 0 1 0 0 0 0 0 0 0     | -27.635  |
| 0 0 0 0 0 0 0 0 0 0 0 0 0 0 0 0 0 1 0 0 0 0 1 0 0 1   | 1.716    |
| 0 0 0 0 0 0 0 0 0 0 0 0 0 0 0 0 0 1 0 0 0 0 1 1 0 0 0 | -111.881 |
| 0 0 0 0 0 0 0 0 0 0 0 0 0 0 0 0 0 1 1 0 0 0 0 1 0 0 0 | 143.799  |
| 0 0 0 0 0 0 0 0 0 0 1 0 0 0 0 0 0 1 0 0 0 0 0 1 0 0 0 | 51.641   |
| 0 0 1 0 0 0 0 0 0 0 0 0 0 0 0 0 0 1 0 0 0 0 0 1 0 0 0 | -101.647 |
| 0 0 0 0 0 0 0 0 0 0 0 0 0 0 0 0 0 1 0 0 1 0 0 0 0 0 1 | -66.498  |
| 0 0 0 0 0 0 0 0 0 0 0 0 0 0 0 0 0 1 0 0 1 1 0 0 0 0 0 | 27.959   |
| 0 0 0 0 0 0 0 0 0 0 0 0 0 0 0 0 0 1 1 0 0 1 0 0 0 0 0 | 57.275   |
| 0 0 0 0 0 0 0 0 0 0 0 1 0 0 0 0 0 0 1 0 0 1 0 0 0 0 0 | -23.468  |
| 0 0 1 0 0 0 0 0 0 0 0 0 0 0 0 0 0 1 0 0 1 0 0 0 0 0 0 | -18.764  |
| 0 0 0 1 0 0 1 1 0 0 0 0 0 0 0 0 0 0 0 0 0 0 0 0 0 0 0 | -5.203   |
| 0 0 0 1 1 0 1 0 0 0 0 0 0 0 0 0 0 0 0 0 0 0 0 0 0 0 0 | 6.005    |
| 0 0 0 1 0 0 0 0 0 0 0 0 0 0 0 0 0 0 0 0 0 0 0 0 1 1 0 | 1.241    |
| 0 0 0 1 0 0 0 0 0 0 0 0 0 0 0 0 0 0 1 0 0 0 0 0 1 0   | -35.335  |
| 0 0 0 1 0 0 0 0 0 0 0 0 0 0 0 0 0 1 0 0 0 0 0 0 0 1 0 | 13.085   |
| 0 0 0 1 0 0 0 0 0 0 0 1 0 0 0 0 0 0 0 0 0 0 0 0 0 1 0 | -13.039  |
| 0 0 0 1 0 0 0 0 0 0 0 0 0 0 0 0 0 0 1 0 0 0 0 0 1 0 0 | -23.054  |
| 0 0 0 1 0 0 0 0 0 0 0 0 0 0 0 0 0 0 1 1 0 0 0 0 0 0 0 | -27.876  |
| 0 0 0 1 0 0 0 0 0 0 0 1 0 0 0 0 0 0 1 0 0 0 0 0 0 0 0 | -7.382   |
| 0 0 0 1 0 0 0 0 0 0 0 0 0 0 0 0 0 1 0 0 0 0 0 0 0 1 0 | 10.795   |
| 0 0 0 1 0 0 0 0 0 0 0 0 0 0 0 0 0 1 0 0 0 1 0 0 0 0 0 | -34.881  |
| 0 0 0 1 0 0 0 0 0 0 0 0 0 0 1 1 0 0 0 0 0 0 0 0 0 0 0 | -12.265  |
| 0 0 0 1 0 0 0 0 0 0 0 1 0 0 1 0 0 0 0 0 0 0 0 0 0 0 0 | 20.009   |
| 0 0 0 1 0 0 0 0 0 0 0 0 1 0 0 0 0 0 0 0 0 0 0 0 1 0 0 | -32.71   |
| 0 0 0 1 0 0 0 0 0 0 0 0 0 1 0 0 0 0 0 0 1 0 0 0 0 0 0 | 4.88     |
| 0 0 0 1 0 0 0 0 0 0 0 0 1 1 0 0 0 0 0 0 0 0 0 0 0 0 0 | 35.387   |
| 0 0 0 1 0 0 0 0 0 0 0 1 1 0 0 0 0 0 0 0 0 0 0 0 0 0 0 | -22.458  |
| 0 0 0 1 0 0 0 0 0 0 0 0 0 0 0 0 0 0 0 0 0 0 0 1 1 0 0 | 16.801   |
| 0 0 0 1 0 0 0 0 0 0 0 0 0 0 0 0 0 1 0 0 0 0 0 0 1 0 0 | -28.927  |
| 0 0 0 1 0 0 0 0 0 0 1 0 0 0 0 0 0 0 0 0 0 0 0 0 1 0 0 | -15.468  |
| 0 0 1 1 0 0 0 0 0 0 0 0 0 0 0 0 0 0 0 0 0 0 0 0 1 0 0 | 13.178   |
| 0 0 0 1 0 0 0 0 0 0 0 0 0 0 0 0 0 0 0 0 0 1 0 0 0 0 1 | 21.166   |
| 0 0 0 1 0 0 0 0 0 0 0 0 0 0 0 0 0 0 0 0 0 1 1 0 0 0 0 | 12.146   |
| 0 0 0 1 0 0 0 0 0 0 0 0 0 0 0 0 0 0 1 0 0 0 1 0 0 0 0 | 13.446   |
| 0 0 0 1 0 0 0 0 0 0 1 0 0 0 0 0 0 0 0 0 1 0 0 0 0 0 0 | -33.326  |
| 0 0 1 1 0 0 0 0 0 0 0 0 0 0 0 0 0 0 0 0 1 0 0 0 0 0 0 | 9.249    |
| 0 0 0 1 0 0 0 0 0 0 0 0 0 0 0 0 0 0 1 0 0 0 0 0 0 0 1 | -33.337  |
| 0 0 0 1 0 0 0 0 0 0 0 0 0 0 0 0 0 1 0 0 0 0 1 0 0 0 0 | 10.376   |
| 0 0 0 1 0 0 0 0 0 0 0 0 0 0 0 0 1 1 0 0 0 0 0 0 0 0 0 | -28.786  |
| 0 0 0 1 0 0 0 0 0 0 1 0 0 0 0 0 0 1 0 0 0 0 0 0 0 0 0 | -15.313  |
| 0 0 1 1 0 0 0 0 0 0 0 0 0 0 0 0 0 0 1 0 0 0 0 0 0 0 0 | 7.541    |
| 0 0 0 0 0 1 0 1 0 0 0 0 0 0 0 0 0 0 0 0 0 0 0 0 1 0 0 | 442.308  |
| 0 0 0 0 0 1 0 1 0 0 0 0 0 0 0 0 0 0 0 1 0 0 0 0 0 0 0 | 1.628    |
| 0 0 0 0 0 1 0 1 0 0 0 0 0 1 0 0 0 0 0 0 0 0 0 0 0 0 0 | -14.319  |
| 0 0 0 0 0 1 0 1 0 0 1 0 0 0 0 0 0 0 0 0 0 0 0 0 0 0 0 | -19.849  |
| 0 0 0 0 1 1 0 0 0 0 0 0 0 0 0 0 0 0 0 0 0 0 0 0 1 0 0 | 108.709  |
| 0 0 0 0 1 1 0 0 0 0 0 0 0 0 0 0 0 0 0 0 1 0 0 0 0 0 0 | -3.93    |
| 0 0 0 0 1 1 0 0 0 0 0 0 0 1 0 0 0 0 0 0 0 0 0 0 0 0 0 | 13.067   |
| 0 0 0 0 1 1 0 0 0 0 0 1 0 0 0 0 0 0 0 0 0 0 0 0 0 0 0 | 20.579   |
| 0 0 0 0 0 1 1 0 0 0 0 0 0 0 0 0 0 0 0 0 0 0 0 0 0 1 0 | 463.515  |
| 0 0 0 0 0 1 1 0 0 0 0 0 0 0 0 0 0 0 1 0 0 0 0 0 0 0 0 | 4.432    |
| 0 0 0 0 0 1 1 0 0 0 0 0 0 0 1 0 0 0 0 0 0 0 0 0 0 0 0 | 16.815   |
| 0 0 0 0 0 1 1 0 0 0 0 0 1 0 0 0 0 0 0 0 0 0 0 0 0 0 0 | 14.215   |
| 0 0 0 0 0 1 0 0 1 0 0 0 0 0 0 0 0 0 0 0 0 0 0 1 0 0 0 | 417.266  |
| 1 0 0 0 0 1 0 0 0 0 0 0 0 0 0 0 0 0 0 0 0 0 0 1 0 0 0 | 322.975  |
| 0 0 0 0 0 1 0 0 1 0 0 0 0 0 0 0 0 0 0 0 1 0 0 0 0 0 0 | 18.09    |
| 1 0 0 0 0 1 0 0 0 0 0 0 0 0 0 0 0 0 0 0 1 0 0 0 0 0 0 | -15.621  |
| 0 0 0 0 0 1 0 0 1 0 0 0 0 0 0 0 1 0 0 0 0 0 0 0 0 0 0 | 6.383    |
| 1 0 0 0 0 1 0 0 0 0 0 0 0 0 0 0 0 1 0 0 0 0 0 0 0 0 0 | 20.254   |
| 0 0 0 1 0 1 0 0 1 0 0 0 0 0 0 0 0 0 0 0 0 0 0 0 0 0 0 | -7.294   |
| 1 0 0 1 0 1 0 0 0 0 0 0 0 0 0 0 0 0 0 0 0 0 0 0 0 0 0 | 21.18    |
| 0 1 0 0 0 0 0 1 0 0 0 0 0 0 0 0 0 0 0 0 0 0 0 0 1 0 0 | -71.818  |
| 0 1 0 0 0 0 0 1 0 0 0 0 0 0 0 0 0 0 0 1 0 0 0 0 0 0 0 | 40.078   |











|                                                     |                     |
|-----------------------------------------------------|---------------------|
| 0 0 0 0 0 2 0 0 0 0 0 0 0 0 0 0 0 0 0 0 0 2 0 0 0 0 | 1.63075             |
| 0 0 0 0 0 2 0 0 0 0 0 0 0 0 0 2 0 0 0 0 0 0 0 0 0 0 | 6.143               |
| 0 0 2 0 0 2 0 0 0 0 0 0 0 0 0 0 0 0 0 0 0 0 0 0 0 0 | 2.0325              |
| 0 0 0 0 0 2 0 0 2 0 0 0 0 0 0 0 0 0 0 0 0 0 0 0 0 0 | 44.414              |
| 2 0 0 0 0 2 0 0 0 0 0 0 0 0 0 0 0 0 0 0 0 0 0 0 0 0 | 25.86575            |
| 0 0 0 0 0 2 2 0 0 0 0 0 0 0 0 0 0 0 0 0 0 0 0 0 0 0 | 54.6355             |
| 0 0 0 0 0 2 0 0 0 0 0 0 0 0 0 0 0 0 0 0 0 0 2 0 0 0 | -59.93425           |
| 0 0 0 0 0 2 0 0 0 0 0 0 0 0 0 0 0 0 2 0 0 0 0 0 0 0 | 4.531               |
| 0 0 0 0 0 2 0 0 0 0 0 0 2 0 0 0 0 0 0 0 0 0 0 0 0 0 | 3.049               |
| 0 0 0 0 0 2 0 0 0 0 2 0 0 0 0 0 0 0 0 0 0 0 0 0 0 0 | -0.79175            |
| 0 0 0 0 0 2 0 2 0 0 0 0 0 0 0 0 0 0 0 0 0 0 0 0 0 0 | 50.023              |
| 0 0 0 0 2 2 0 0 0 0 0 0 0 0 0 0 0 0 0 0 0 0 0 0 0 0 | 2.07525             |
| 0 0 0 0 0 2 2 0 0 0 0 0 0 0 0 0 0 0 0 0 0 0 0 0 2 0 | -59.81025           |
| 0 0 0 0 0 2 0 0 0 0 0 0 0 0 0 0 2 0 0 0 0 0 0 0 0 0 | 5.67275             |
| 0 0 0 0 0 2 0 0 0 0 0 2 0 0 0 0 0 0 0 0 0 0 0 0 0 0 | 4.864               |
| 0 0 0 0 0 2 0 0 0 0 0 0 0 0 0 0 0 0 0 0 0 2 0 0 0 0 | -60.123             |
| 0 0 0 0 0 2 0 0 0 0 0 0 0 0 0 2 0 0 0 0 0 0 0 0 0 0 | 7.659               |
| 0 1 0 0 0 3 0 0 0 0 0 0 0 0 0 0 0 0 0 0 0 0 0 0 0 0 | -6.1003333333333325 |
| 0 2 0 0 0 0 0 0 0 0 0 0 0 0 0 0 0 0 0 0 0 0 0 0 0 2 | -1.07925            |
| 0 2 0 0 0 0 0 0 0 0 0 0 0 0 0 0 0 0 0 0 2 0 0 0 0 0 | -3.439              |
| 0 2 0 0 0 0 0 0 0 0 0 0 0 0 0 2 0 0 0 0 0 0 0 0 0 0 | -2.5025             |
| 0 2 0 0 0 0 0 0 0 2 0 0 0 0 0 0 0 0 0 0 0 0 0 0 0 0 | -2.6945             |
| 0 2 2 0 0 0 0 0 0 0 0 0 0 0 0 0 0 0 0 0 0 0 0 0 0 0 | 1.405               |
| 0 2 0 0 0 0 0 0 2 0 0 0 0 0 0 0 0 0 0 0 0 0 0 0 0 0 | 0.779               |
| 2 2 0 0 0 0 0 0 0 0 0 0 0 0 0 0 0 0 0 0 0 0 0 0 0 0 | 5.37675             |
| 0 2 0 0 0 0 0 0 0 0 0 0 0 0 0 0 0 0 0 0 0 0 2 0 0 0 | -1.0945             |
| 0 2 0 0 0 0 0 0 0 0 0 0 0 0 0 0 0 0 2 0 0 0 0 0 0 0 | -3.59725            |
| 0 2 0 0 0 0 0 0 0 0 0 0 2 0 0 0 0 0 0 0 0 0 0 0 0 0 | -3.913              |
| 0 2 0 0 0 0 0 0 0 0 2 0 0 0 0 0 0 0 0 0 0 0 0 0 0 0 | -1.152              |
| 0 2 0 0 0 0 0 2 0 0 0 0 0 0 0 0 0 0 0 0 0 0 0 0 0 0 | 1.4605              |
| 0 2 0 0 2 0 0 0 0 0 0 0 0 0 0 0 0 0 0 0 0 0 0 0 0 0 | 2.263               |
| 0 2 0 0 0 0 0 0 0 0 0 0 0 0 0 0 0 0 0 0 0 0 0 2 0 0 | -1.05825            |
| 0 2 0 0 0 0 0 0 0 0 0 0 0 0 0 0 0 2 0 0 0 0 0 0 0 0 | -2.269              |
| 0 2 0 0 0 0 0 0 0 0 0 0 0 2 0 0 0 0 0 0 0 0 0 0 0 0 | -10.02725           |
| 0 2 0 0 0 0 0 0 0 0 0 0 0 0 0 0 0 0 0 0 0 2 0 0 0 0 | -1.087              |
| 0 2 0 0 0 0 0 0 0 0 0 0 0 0 0 0 0 0 0 2 0 0 0 0 0 0 | -8.41125            |
| 0 2 0 0 0 0 0 0 0 0 0 0 0 0 0 2 0 0 0 0 0 0 0 0 0 0 | -2.3055             |
| 0 2 0 2 0 0 0 0 0 0 0 0 0 0 0 0 0 0 0 0 0 0 0 0 0 0 | -1.105              |
| 0 2 0 0 0 2 0 0 0 0 0 0 0 0 0 0 0 0 0 0 0 0 0 0 0 0 | 3.4825              |
| 0 3 0 0 0 1 0 0 0 0 0 0 0 0 0 0 0 0 0 0 0 0 0 0 0 0 | 0.9006666666666666  |
| 0 0 0 0 0 0 0 0 0 0 0 0 0 0 0 1 0 0 0 0 1 0 0 0 0 2 | 26.9365             |
| 0 0 0 0 0 0 0 0 0 1 0 0 0 0 0 0 0 0 0 0 1 0 0 0 0 2 | 8.9655              |
| 0 0 0 0 0 0 0 0 0 1 0 0 0 0 1 0 0 0 0 0 0 0 0 0 0 2 | -12.272             |
| 0 0 0 0 0 0 0 0 0 1 0 0 0 0 1 0 0 0 0 2 0 0 0 0 0 0 | 3.242               |
| 0 0 0 0 0 0 0 0 0 1 0 0 0 0 2 0 0 0 0 1 0 0 0 0 0 0 | -2.618              |
| 0 0 0 0 0 0 0 0 0 2 0 0 0 0 1 0 0 0 0 1 0 0 0 0 0 0 | 3.1035              |
| 0 0 1 0 0 0 0 0 0 0 0 0 0 0 0 0 0 0 0 0 1 0 0 0 0 2 | -13.5465            |
| 0 0 1 0 0 0 0 0 0 0 0 0 0 0 0 1 0 0 0 0 0 0 0 0 0 2 | 19.8775             |
| 0 0 1 0 0 0 0 0 0 0 0 0 0 0 2 0 0 0 0 1 0 0 0 0 0 0 | 5.9615              |
| 0 0 1 0 0 0 0 0 0 1 0 0 0 0 0 0 0 0 0 0 0 0 0 0 0 2 | 6.407               |
| 0 0 1 0 0 0 0 0 0 1 0 0 0 0 0 2 0 0 0 0 0 0 0 0 0 0 | -3.5875             |
| 0 0 1 0 0 0 0 0 0 2 0 0 0 0 0 0 0 0 0 0 1 0 0 0 0 0 | 1.995               |
| 0 0 2 0 0 0 0 0 0 0 0 0 0 0 0 1 0 0 0 0 1 0 0 0 0 0 | -4.309              |
| 0 0 2 0 0 0 0 0 0 1 0 0 0 0 1 0 0 0 0 0 0 0 0 0 0 0 | 3.1455              |
| 0 0 0 0 0 0 0 0 2 0 0 0 0 0 1 0 0 0 0 0 0 0 0 0 0 1 | 2.078               |
| 0 0 0 0 0 0 0 0 2 0 0 0 0 0 1 0 0 0 0 1 0 0 0 0 0 0 | -6.965              |
| 0 0 0 0 0 0 0 0 2 1 0 0 0 0 0 0 0 0 0 0 1 0 0 0 0 0 | -2.6545             |
| 0 0 0 0 0 0 0 0 2 1 0 0 0 0 1 0 0 0 0 0 0 0 0 0 0 0 | 2.3845              |
| 0 0 1 0 0 0 0 0 2 0 0 0 0 0 0 0 0 0 0 0 1 0 0 0 0 0 | 4.3195              |
| 0 0 1 0 0 0 0 0 2 0 0 0 0 0 1 0 0 0 0 0 0 0 0 0 0 0 | -4.0925             |
| 0 0 1 0 0 0 0 0 2 1 0 0 0 0 0 0 0 0 0 0 0 0 0 0 0 0 | -1.5485             |
| 1 0 0 0 0 0 0 0 1 0 0 0 0 0 0 0 0 0 0 0 0 0 0 0 0 2 | -58.5315            |
| 1 0 0 0 0 0 0 0 1 0 0 0 0 0 0 0 0 0 0 0 2 0 0 0 0 0 | 6.2445              |
| 1 0 0 0 0 0 0 0 1 0 0 0 0 0 2 0 0 0 0 0 0 0 0 0 0 0 | 5.536               |
| 1 0 0 0 0 0 0 0 1 2 0 0 0 0 0 0 0 0 0 0 0 0 0 0 0 0 | 2.947               |
| 1 0 2 0 0 0 0 0 1 0 0 0 0 0 0 0 0 0 0 0 0 0 0 0 0 0 | 1.576               |
| 2 0 0 0 0 0 0 0 0 0 0 0 0 0 0 1 0 0 0 0 1 0 0 0 0 0 | -7.511              |

2 0 0 0 0 0 0 0 0 0 1 0 0 0 0 0 0 0 0 0 1 0 0 0 0 -6.1595  
2 0 1 0 0 0 0 0 0 0 0 0 0 0 0 0 0 0 0 1 0 0 0 0 2.6875  
2 0 1 0 0 0 0 0 0 0 0 0 0 0 1 0 0 0 0 0 0 0 0 0 0 -2.434  
2 0 1 0 0 0 0 0 0 1 0 0 0 0 0 0 0 0 0 0 0 0 0 0 0 -2.9815  
0 0 0 0 0 0 2 0 0 0 0 0 0 0 0 0 0 0 0 1 0 0 0 1 -2.8405  
0 0 0 0 0 0 2 0 0 0 0 0 0 0 1 0 0 0 0 1 0 0 0 0 -6.389  
0 0 0 0 0 0 2 0 0 1 0 0 0 0 0 0 0 0 0 0 1 0 0 0 0 -2.1205  
0 0 0 0 0 0 2 0 0 1 0 0 0 0 1 0 0 0 0 0 0 0 0 0 0 3.825  
0 0 1 0 0 0 2 0 0 0 0 0 0 0 0 0 0 0 0 0 1 0 0 0 0 4.888  
0 0 1 0 0 0 2 0 0 0 0 0 0 0 0 1 0 0 0 0 0 0 0 0 0 -6.6035  
0 0 1 0 0 0 2 0 0 1 0 0 0 0 0 0 0 0 0 0 0 0 0 0 0 -1.812  
1 0 0 0 0 0 2 0 1 0 0 0 0 0 0 0 0 0 0 0 0 0 0 0 0 55.706  
0 0 0 0 0 0 0 0 0 0 0 0 0 0 0 0 0 0 0 0 0 1 0 2 0 1 5.2895  
0 0 0 0 0 0 0 0 0 0 0 0 0 0 0 1 0 0 0 0 0 0 2 0 1 -2.4525  
0 0 0 0 0 0 0 0 0 0 0 0 0 0 0 1 0 0 0 0 1 0 2 0 0 27.1485  
0 0 0 0 0 0 0 0 0 0 1 0 0 0 0 0 0 0 0 0 0 0 2 0 1 2.7475  
0 0 0 0 0 0 0 0 0 0 1 0 0 0 0 0 0 0 0 0 0 1 0 2 0 0 8.958  
0 0 0 0 0 0 0 0 0 1 0 0 0 0 1 0 0 0 0 0 0 2 0 0 -12.609  
0 0 1 0 0 0 0 0 0 0 0 0 0 0 0 0 0 0 0 0 0 1 0 2 0 0 -13.814  
0 0 1 0 0 0 0 0 0 0 0 0 0 0 0 0 1 0 0 0 0 0 0 2 0 0 20.152  
0 0 1 0 0 0 0 0 0 0 1 0 0 0 0 0 0 0 0 0 0 0 2 0 0 6.4455  
1 0 0 0 0 0 0 0 0 1 0 0 0 0 0 0 0 0 0 0 0 0 2 0 0 -58.7545  
0 0 0 0 0 0 0 0 0 0 0 0 0 0 0 0 0 0 0 1 0 2 0 1 0 0 1.7785  
0 0 0 0 0 0 0 0 0 0 0 0 0 0 0 0 0 1 0 0 2 0 0 0 0 0 1 2.667  
0 0 0 0 0 0 0 0 0 0 0 0 0 0 0 0 0 1 0 0 2 0 1 0 0 0 0 -5.548  
0 0 0 0 0 0 0 0 0 0 1 0 0 0 0 0 0 0 0 2 0 1 0 0 0 0 -5.72  
0 0 1 0 0 0 0 0 0 0 0 0 0 0 0 0 0 0 0 2 0 1 0 0 0 0 7.0115  
0 0 1 0 0 0 0 0 0 0 0 0 0 0 0 0 1 0 0 2 0 0 0 0 0 0 -5.056  
0 0 1 0 0 0 0 0 0 0 1 0 0 0 0 0 0 0 0 2 0 0 0 0 0 0 -2.5415  
1 0 0 0 0 0 0 0 0 1 0 0 0 0 0 0 0 0 0 2 0 0 0 0 0 0 5.9475  
0 0 0 0 0 0 0 0 0 0 0 0 0 0 0 1 0 0 0 0 0 0 0 0 1 0 2 1.657  
0 0 0 0 0 0 2 0 0 0 0 0 0 1 0 0 0 0 0 0 0 0 0 0 1 0 0 1.912  
0 0 0 0 0 0 0 0 0 0 0 0 0 0 1 0 0 0 0 0 1 0 0 0 0 0 2 28.474  
0 0 0 0 0 0 0 0 0 0 0 0 0 0 1 0 0 0 0 0 1 0 2 0 0 0 0 -2.9115  
0 0 0 0 0 0 0 0 0 0 0 0 0 0 1 0 2 0 0 0 1 0 0 0 0 0 0 -5.7235  
0 0 0 0 0 0 0 0 0 0 2 0 0 1 0 0 0 0 0 1 0 0 0 0 0 0 1.515  
0 0 2 0 0 0 0 0 0 0 0 0 0 0 1 0 0 0 0 0 1 0 0 0 0 0 0 -4.8935  
0 0 0 0 0 0 0 0 0 2 0 0 0 0 0 1 0 0 0 0 0 1 0 0 0 0 0 -6.8915  
2 0 0 0 0 0 0 0 0 0 0 0 0 0 1 0 0 0 0 0 1 0 0 0 0 0 0 -4.186  
0 0 0 0 0 0 2 0 0 0 0 0 0 1 0 0 0 0 0 1 0 0 0 0 0 0 -7.288  
0 0 0 0 0 0 0 0 0 0 0 0 0 0 1 0 0 0 0 0 1 0 0 0 2 0 0 28.897  
0 0 0 0 0 0 0 0 0 0 0 0 0 0 2 0 1 0 0 0 0 0 0 0 0 0 1 -1.8545  
0 0 0 0 0 0 0 0 0 0 0 0 0 0 2 0 1 0 0 0 0 0 1 0 0 0 0 -3.375  
0 0 0 0 0 0 0 0 0 0 0 1 0 0 2 0 0 0 0 0 0 0 0 1 0 0 0 0 -5.6115  
0 0 1 0 0 0 0 0 0 0 0 0 0 0 2 0 0 0 0 0 0 0 1 0 0 0 0 2.448  
0 0 1 0 0 0 0 0 0 0 0 0 0 0 2 0 1 0 0 0 0 0 0 0 0 0 0 -3.083  
1 0 0 0 0 0 0 0 0 1 0 0 0 2 0 0 0 0 0 0 0 0 0 0 0 0 0 3.1665  
0 0 0 0 0 0 0 0 0 0 0 0 0 0 2 0 0 0 0 0 1 0 0 0 1 0 0 -1.904  
0 0 0 0 0 0 0 0 0 0 0 0 0 1 0 0 0 0 0 0 0 1 0 0 0 0 0 2 -12.4465  
0 0 0 0 0 0 0 0 0 0 0 1 0 0 0 0 0 0 0 1 0 2 0 0 0 0 2.829  
0 0 0 0 0 0 0 0 0 0 0 0 1 0 0 0 0 2 0 0 1 0 0 0 0 0 0 2.752  
0 0 0 0 0 0 0 0 0 0 2 1 0 0 0 0 0 0 0 1 0 0 0 0 0 0 -1.664  
0 0 2 0 0 0 0 0 0 0 0 1 0 0 0 0 0 0 0 1 0 0 0 0 0 0 3.053  
0 0 0 0 0 0 0 0 0 2 0 1 0 0 0 0 0 0 0 1 0 0 0 0 0 0 3.257  
0 0 0 0 0 0 2 0 0 0 1 0 0 0 0 0 0 0 1 0 0 0 0 0 0 0 2.6865  
0 0 0 0 0 0 0 0 0 0 0 1 0 0 0 0 0 0 0 1 0 0 0 2 0 0 -12.402  
0 0 0 0 0 0 0 0 0 0 0 1 0 1 0 0 0 0 0 0 0 0 0 0 0 0 2 8.8175  
0 0 0 0 0 0 0 0 0 0 0 1 0 1 0 0 0 0 0 0 0 2 0 0 0 0 -2.9275  
0 0 0 0 0 0 0 0 0 0 0 1 0 1 0 2 0 0 0 0 0 0 0 0 0 0 -2.3415  
0 0 0 0 0 0 0 0 0 0 2 1 0 1 0 0 0 0 0 0 0 0 0 0 0 0 -2.331  
0 0 0 0 0 0 0 0 0 2 0 1 0 1 0 0 0 0 0 0 0 0 0 0 0 0 -2.2745  
0 0 0 0 0 0 2 0 0 0 1 0 1 0 0 0 0 0 0 0 0 0 0 0 0 0 -2.5985  
0 0 0 0 0 0 0 0 0 0 1 0 1 0 0 0 0 0 0 0 0 0 0 2 0 0 9.0425  
0 0 0 0 0 0 0 0 0 0 0 1 0 1 0 0 0 0 0 2 0 0 0 0 0 0 -3.6375  
0 0 0 0 0 0 0 0 0 0 2 0 0 0 1 0 0 0 0 1 0 0 0 0 0 -2.3735  
0 0 1 0 0 0 0 0 0 0 2 0 0 0 0 0 0 0 0 0 1 0 0 0 0 2.784  
0 0 1 0 0 0 0 0 0 0 1 2 0 0 0 0 0 0 0 0 0 0 0 0 0 0 -1.986

|                                                   |          |
|---------------------------------------------------|----------|
| 0 0 0 0 0 0 0 0 0 0 2 0 1 0 0 0 0 1 0 0 0 0 0 0   | -1.69    |
| 0 0 0 0 0 0 0 0 2 0 0 0 0 0 0 0 0 0 0 0 1 0 0 0 1 | -1.564   |
| 0 0 0 0 0 0 0 0 2 0 0 0 0 0 0 1 0 0 0 0 0 0 0 0 1 | 1.9735   |
| 0 0 0 0 0 0 0 0 2 0 0 0 0 0 0 1 0 0 0 0 1 0 0 0 0 | -6.3605  |
| 0 0 0 0 0 0 0 0 2 0 1 0 0 0 0 0 0 0 0 0 1 0 0 0 0 | -2.4415  |
| 0 0 0 0 0 0 0 0 2 0 1 0 0 0 0 1 0 0 0 0 0 0 0 0 0 | 2.759    |
| 0 0 1 0 0 0 0 0 2 0 0 0 0 0 0 0 0 0 0 0 1 0 0 0 0 | 4.1665   |
| 0 0 1 0 0 0 0 0 2 0 0 0 0 0 0 1 0 0 0 0 0 0 0 0 0 | -5.6535  |
| 0 0 1 0 0 0 0 0 2 0 1 0 0 0 0 0 0 0 0 0 0 0 0 0 0 | -2.0545  |
| 1 0 0 0 0 0 0 0 2 1 0 0 0 0 0 0 0 0 0 0 0 0 0 0 0 | 49.1885  |
| 0 0 0 0 0 0 0 0 2 0 0 0 0 1 0 0 0 0 1 0 0 0 0 0 0 | -7.381   |
| 0 0 0 0 0 0 0 0 2 0 0 1 0 0 0 0 0 0 1 0 0 0 0 0 0 | 3.606    |
| 0 0 0 0 0 0 0 0 2 0 0 1 0 1 0 0 0 0 0 0 0 0 0 0 0 | -2.7255  |
| 0 0 0 0 1 0 0 1 0 0 0 0 0 0 0 0 0 0 0 0 0 0 0 0 2 | -22.3995 |
| 0 0 0 0 1 0 0 1 0 0 0 0 0 0 0 0 0 0 0 0 2 0 0 0 0 | 3.712    |
| 0 0 0 0 1 0 0 1 0 0 0 0 0 0 0 2 0 0 0 0 0 0 0 0 0 | 1.632    |
| 0 0 0 0 1 0 0 1 0 2 0 0 0 0 0 0 0 0 0 0 0 0 0 0 0 | 1.589    |
| 0 0 0 0 1 0 0 1 2 0 0 0 0 0 0 0 0 0 0 0 0 0 0 0 0 | 13.6315  |
| 2 0 0 0 1 0 0 1 0 0 0 0 0 0 0 0 0 0 0 0 0 0 0 0 0 | 5.0465   |
| 0 0 0 0 1 0 2 1 0 0 0 0 0 0 0 0 0 0 0 0 0 0 0 0 0 | 17.4235  |
| 0 0 0 0 1 0 0 1 0 0 0 0 0 0 0 0 0 0 0 0 0 2 0 0 0 | -22.732  |
| 0 0 0 0 1 0 0 1 0 0 0 0 0 0 0 0 0 2 0 0 0 0 0 0 0 | 2.0985   |
| 0 0 0 0 2 0 0 0 0 0 0 0 0 0 1 0 0 0 0 1 0 0 0 0 0 | -2.993   |
| 0 0 0 0 2 0 0 0 0 0 0 0 1 0 0 0 0 1 0 0 0 0 0 0 0 | -2.159   |
| 0 0 0 0 0 0 0 0 0 0 0 0 0 0 0 0 0 0 0 1 0 0 2 1   | 6.3515   |
| 0 0 0 0 0 0 0 0 0 0 0 0 0 0 1 0 0 0 0 0 0 0 2 1   | -3.6255  |
| 0 0 0 0 0 0 0 0 0 0 0 0 0 0 1 0 0 0 0 1 0 0 2 0   | 27.1105  |
| 0 0 0 0 0 0 0 0 0 1 0 0 0 0 0 0 0 0 0 0 0 0 2 1   | 2.368    |
| 0 0 0 0 0 0 0 0 0 1 0 0 0 0 0 0 0 0 0 1 0 0 2 0   | 9.1795   |
| 0 0 0 0 0 0 0 0 0 1 0 0 0 0 1 0 0 0 0 0 0 0 2 0   | -12.367  |
| 0 0 1 0 0 0 0 0 0 0 0 0 0 0 0 0 0 0 0 1 0 0 2 0   | -13.3875 |
| 0 0 1 0 0 0 0 0 0 0 0 0 0 0 0 1 0 0 0 0 0 0 2 0   | 19.8545  |
| 0 0 1 0 0 0 0 0 0 1 0 0 0 0 0 0 0 0 0 0 0 0 2 0   | 6.292    |
| 1 0 0 0 0 0 0 0 0 1 0 0 0 0 0 0 0 0 0 0 0 0 2 0   | -58.113  |
| 0 0 0 0 0 0 0 0 0 0 0 0 0 1 0 0 0 0 0 0 0 0 1 2 0 | 1.784    |
| 0 0 0 0 0 0 0 0 0 0 0 0 0 1 0 0 0 0 1 0 0 0 2 0   | 28.5575  |
| 0 0 0 0 0 0 0 0 0 0 1 0 0 0 0 0 0 1 0 0 0 0 2 0   | -12.289  |
| 0 0 0 0 0 0 0 0 0 0 1 0 1 0 0 0 0 0 0 0 0 0 2 0   | 8.872    |
| 0 0 0 0 1 0 0 1 0 0 0 0 0 0 0 0 0 0 0 0 0 0 2 0   | -22.518  |
| 0 0 0 0 0 0 0 0 0 0 0 0 0 0 0 0 0 1 0 0 0 0 1 2   | -6.6425  |
| 0 0 0 0 0 0 0 0 0 0 0 0 0 0 0 0 0 1 0 0 2 0 0 1 0 | 3.3545   |
| 0 0 0 0 0 0 0 0 0 2 0 0 0 0 0 0 0 1 0 0 0 0 0 1 0 | 1.743    |
| 0 0 0 0 0 0 2 0 0 0 0 0 0 0 0 0 1 0 0 0 0 0 1 0   | 1.6815   |
| 0 0 0 0 0 0 0 0 0 0 0 0 0 0 0 0 0 1 0 0 0 2 1 0   | -5.446   |
| 0 0 0 0 0 0 0 0 0 0 0 0 2 0 0 0 1 0 0 0 0 0 1 0   | -2.3675  |
| 0 0 0 0 0 0 0 2 0 0 0 0 0 0 0 0 1 0 0 0 0 0 1 0   | 1.686    |
| 0 0 0 0 0 0 0 0 0 0 0 0 0 0 0 0 0 2 0 0 1 0 0 0 1 | -2.5135  |
| 0 0 0 0 0 0 0 0 0 0 0 0 0 0 0 1 0 2 0 0 1 0 0 0 0 | -4.447   |
| 0 0 0 0 0 0 0 0 0 1 0 0 0 0 0 0 2 0 0 1 0 0 0 0   | 2.3725   |
| 0 0 0 0 0 0 0 0 0 1 0 0 0 0 1 0 2 0 0 0 0 0 0 0   | 5.3755   |
| 0 0 1 0 0 0 0 0 0 0 0 0 0 0 0 0 0 2 0 0 1 0 0 0 0 | 5.6755   |
| 0 0 1 0 0 0 0 0 0 0 0 0 0 0 0 1 0 2 0 0 0 0 0 0 0 | -7.217   |
| 1 0 0 0 0 0 0 0 0 1 0 0 0 0 0 0 0 2 0 0 0 0 0 0 0 | 7.736    |
| 0 0 0 0 0 0 0 0 0 0 0 0 0 0 1 0 0 0 2 1 0 0 0 0 0 | -8.7515  |
| 0 0 0 0 0 0 0 0 0 0 1 0 0 0 0 0 2 1 0 0 0 0 0 0 0 | 2.3205   |
| 0 0 0 0 0 0 0 0 0 0 1 0 1 0 0 0 2 0 0 0 0 0 0 0 0 | -3.9835  |
| 0 0 0 0 1 0 0 1 0 0 0 0 0 0 0 0 0 2 0 0 0 0 0 0 0 | 2.3075   |
| 0 0 0 0 0 0 0 0 0 0 0 0 0 0 0 1 0 0 0 0 0 0 0 1 2 | 4.19     |
| 0 0 0 0 0 0 0 0 0 0 0 0 0 0 1 0 0 0 0 0 2 0 0 1 0 | -2.9195  |
| 0 0 0 0 0 0 0 0 0 0 0 0 0 0 1 2 0 0 0 0 0 0 0 1 0 | -1.8765  |
| 0 0 0 0 0 0 0 0 2 0 0 0 0 1 0 0 0 0 0 0 0 0 0 1 0 | -2.2495  |
| 0 0 0 0 0 0 2 0 0 0 0 0 0 1 0 0 0 0 0 0 0 0 0 1 0 | -4.2695  |
| 0 0 0 0 0 0 0 0 0 0 0 0 0 0 1 0 0 0 0 0 0 0 2 1 0 | 3.6435   |
| 0 0 0 0 0 0 2 0 0 0 0 0 1 0 0 0 0 0 0 0 0 0 0 1 0 | -1.707   |
| 0 0 0 0 0 0 0 0 0 0 0 0 0 0 1 0 0 1 0 0 0 0 0 0 2 | 10.625   |
| 0 0 0 0 0 0 0 0 0 0 0 0 0 0 1 0 0 1 0 0 2 0 0 0 0 | -5.626   |
| 0 0 0 0 0 0 0 0 0 0 0 0 0 0 1 2 0 1 0 0 0 0 0 0 0 | -2.8845  |

|                                                 |          |
|-------------------------------------------------|----------|
| 0 0 0 0 0 0 0 0 0 2 0 0 0 1 0 0 1 0 0 0 0 0 0 0 | -2.6925  |
| 0 0 2 0 0 0 0 0 0 0 0 0 0 1 0 0 1 0 0 0 0 0 0 0 | -2.243   |
| 0 0 0 0 0 0 0 0 2 0 0 0 0 1 0 0 1 0 0 0 0 0 0 0 | -4.025   |
| 2 0 0 0 0 0 0 0 0 0 0 0 0 1 0 0 1 0 0 0 0 0 0 0 | 1.9635   |
| 0 0 0 0 0 0 2 0 0 0 0 0 0 1 0 0 1 0 0 0 0 0 0 0 | -4.38    |
| 0 0 0 0 0 0 0 0 0 0 0 0 0 1 0 0 1 0 0 0 0 2 0 0 | 11.021   |
| 0 0 0 0 0 0 0 0 0 2 0 0 1 0 0 1 0 0 0 0 0 0 0 0 | 2.0835   |
| 0 0 0 0 0 0 2 0 0 0 0 0 1 0 0 1 0 0 0 0 0 0 0 0 | -4.9085  |
| 0 0 0 0 2 0 0 0 0 0 0 0 0 1 0 0 1 0 0 0 0 0 0 0 | 1.5345   |
| 0 0 0 0 0 0 0 0 0 0 0 0 0 1 0 0 1 0 0 0 0 0 2 0 | 10.5735  |
| 0 0 0 0 0 0 0 0 0 0 0 0 0 1 0 0 2 0 0 0 0 0 1 0 | -3.2785  |
| 0 0 0 0 0 0 0 0 0 0 0 0 2 1 0 0 0 0 0 1 0 0 0 0 | 10.2855  |
| 0 0 0 0 0 0 0 0 0 1 0 0 0 2 0 0 0 0 0 0 1 0 0 0 | -3.474   |
| 0 0 0 0 0 0 0 0 1 0 0 0 2 1 0 0 0 0 0 0 0 0 0 0 | -4.5185  |
| 0 0 1 0 0 0 0 0 0 0 0 0 2 0 0 0 0 0 0 1 0 0 0 0 | 3.446    |
| 0 0 1 0 0 0 0 0 0 1 0 0 0 2 0 0 0 0 0 0 0 0 0 0 | 3.599    |
| 1 0 0 0 0 0 0 0 1 0 0 0 2 0 0 0 0 0 0 0 0 0 0 0 | 6.135    |
| 0 0 0 0 0 0 0 0 0 0 0 1 2 0 0 0 1 0 0 0 0 0 0 0 | 8.675    |
| 0 0 0 0 0 0 0 0 0 0 1 0 0 2 0 0 0 1 0 0 0 0 0 0 | -5.7025  |
| 0 0 0 0 0 0 0 0 0 1 0 1 2 0 0 0 0 0 0 0 0 0 0 0 | -8.6665  |
| 0 0 0 0 1 0 0 1 0 0 0 0 2 0 0 0 0 0 0 0 0 0 0 0 | 2.7595   |
| 0 0 0 0 0 0 0 0 0 0 0 0 2 0 0 1 0 0 0 0 0 0 1 0 | 1.524    |
| 0 0 0 0 0 0 0 0 2 0 0 1 0 0 0 0 0 0 0 0 0 0 1 0 | 1.648    |
| 0 0 0 0 0 0 0 0 0 0 0 1 0 0 0 0 2 0 0 0 0 0 1 0 | 3.0235   |
| 0 0 0 0 0 0 0 2 0 0 0 1 0 0 0 0 0 0 0 0 0 0 1 0 | 1.8795   |
| 0 0 0 0 0 0 0 0 0 0 1 0 0 0 0 1 0 0 0 0 0 0 2   | -32.788  |
| 0 0 0 0 0 0 0 0 0 0 1 0 0 0 0 1 0 0 2 0 0 0 0   | -4.7245  |
| 0 0 0 0 0 0 0 0 0 0 1 0 0 2 0 1 0 0 0 0 0 0 0 0 | 10.4375  |
| 0 0 2 0 0 0 0 0 0 0 0 1 0 0 0 0 1 0 0 0 0 0 0 0 | 3.4235   |
| 0 0 0 0 0 0 0 0 2 0 0 1 0 0 0 0 1 0 0 0 0 0 0 0 | 7.654    |
| 2 0 0 0 0 0 0 0 0 0 0 1 0 0 0 0 1 0 0 0 0 0 0 0 | 7.649    |
| 0 0 0 0 0 0 2 0 0 0 0 1 0 0 0 0 1 0 0 0 0 0 0 0 | 8.9965   |
| 0 0 0 0 0 0 0 0 0 0 0 1 0 0 0 0 1 0 0 0 0 2 0 0 | -33.0125 |
| 0 0 0 0 0 0 0 0 0 0 0 1 0 0 0 0 1 2 0 0 0 0 0 0 | 8.705    |
| 0 0 0 0 0 0 0 0 0 0 0 1 2 0 0 0 1 0 0 0 0 0 0 0 | 6.7425   |
| 0 0 0 0 0 0 0 2 0 0 0 1 0 0 0 0 1 0 0 0 0 0 0 0 | 7.746    |
| 0 0 0 0 2 0 0 0 0 0 0 1 0 0 0 0 1 0 0 0 0 0 0 0 | 2.0365   |
| 0 0 0 0 0 0 0 0 0 0 0 1 0 0 0 0 1 0 0 0 0 0 2 0 | -32.722  |
| 0 0 0 0 0 0 0 0 0 0 0 1 0 1 0 0 0 0 0 0 0 0 0 2 | 9.3455   |
| 0 0 0 0 0 0 0 0 0 0 0 1 0 1 0 0 0 0 0 2 0 0 0 0 | 5.1675   |
| 0 0 0 0 0 0 0 0 0 0 0 1 0 1 2 0 0 0 0 0 0 0 0 0 | -3.406   |
| 0 0 0 0 0 0 0 0 2 0 1 0 1 0 0 0 0 0 0 0 0 0 0 0 | 2.5375   |
| 0 0 0 0 0 0 0 2 0 0 1 0 1 0 0 0 0 0 0 0 0 0 0 0 | -2.4145  |
| 2 0 0 0 0 0 0 0 0 0 0 1 0 1 0 0 0 0 0 0 0 0 0 0 | -5.378   |
| 0 0 0 0 0 2 0 0 0 0 1 0 1 0 0 0 0 0 0 0 0 0 0 0 | -2.961   |
| 0 0 0 0 0 0 0 0 0 0 0 1 0 1 0 0 0 0 0 0 0 2 0 0 | 9.2585   |
| 0 0 0 0 0 0 0 0 0 0 0 1 0 1 0 0 0 2 0 0 0 0 0 0 | -7.5685  |
| 0 0 0 0 0 0 0 0 0 0 0 1 2 1 0 0 0 0 0 0 0 0 0 0 | -5.1155  |
| 0 0 0 0 0 0 0 0 0 2 1 0 1 0 0 0 0 0 0 0 0 0 0 0 | -2.891   |
| 0 0 0 0 0 0 0 2 0 0 0 1 0 1 0 0 0 0 0 0 0 0 0 0 | -2.8375  |
| 0 0 0 0 0 0 0 0 0 0 0 1 0 1 0 0 0 0 0 0 0 0 2 0 | 9.2605   |
| 0 0 0 0 0 0 0 0 0 0 0 1 0 1 0 0 2 0 0 0 0 0 0 0 | 2.837    |
| 0 0 0 0 0 0 0 0 0 0 0 1 0 2 0 0 1 0 0 0 0 0 0 0 | -4.6545  |
| 0 0 0 0 0 0 0 0 0 0 0 2 0 0 0 0 0 0 0 1 0 0 0 1 | -2.7065  |
| 0 0 0 0 0 0 0 0 0 0 0 2 0 0 1 0 0 0 0 1 0 0 0 0 | -2.8155  |
| 0 0 0 0 0 0 0 0 0 1 0 2 0 0 0 0 0 0 0 1 0 0 0 0 | 3.83     |
| 0 0 0 0 0 0 0 0 0 1 0 2 0 0 1 0 0 0 0 0 0 0 0 0 | 7.7975   |
| 0 0 1 0 0 0 0 0 0 0 0 2 0 0 0 0 0 0 0 1 0 0 0 0 | 4.917    |
| 0 0 1 0 0 0 0 0 0 0 0 2 0 0 1 0 0 0 0 0 0 0 0 0 | -7.7605  |
| 1 0 0 0 0 0 0 0 1 0 0 2 0 0 0 0 0 0 0 0 0 0 0 0 | 7.271    |
| 0 0 0 0 0 0 0 0 0 0 0 2 0 0 0 0 0 1 0 0 0 1 0 0 | 2.1555   |
| 0 0 0 0 0 0 0 0 0 0 2 1 0 0 0 0 1 0 0 0 0 0 0 0 | -6.393   |
| 0 0 0 0 0 0 0 0 0 1 2 1 0 0 0 0 0 0 0 0 0 0 0 0 | -3.2195  |
| 0 0 0 0 1 0 0 1 0 0 0 2 0 0 0 0 0 0 0 0 0 0 0 0 | 2.7695   |
| 0 0 0 0 0 0 0 0 0 0 0 2 0 0 0 0 1 0 0 0 0 0 1 0 | 2.052    |
| 0 0 0 0 0 0 0 0 0 0 2 0 1 0 0 0 0 0 0 0 0 0 1 0 | -2.2225  |
| 0 0 0 0 0 0 0 0 0 0 2 0 1 0 0 1 0 0 0 0 0 0 0 0 | -8.8605  |



0 0 0 0 0 0 0 0 0 0 1 0 0 0 0 1 2 0 0 0 0 0 0 0 0 0 3.6335  
0 0 1 0 0 0 0 0 0 0 0 0 0 0 0 2 0 0 0 1 0 0 0 0 0 6.4555  
0 0 1 0 0 0 0 0 0 0 0 0 0 0 1 2 0 0 0 0 0 0 0 0 0 -8.493  
0 0 1 0 0 0 0 0 0 1 0 0 0 0 0 2 0 0 0 0 0 0 0 0 -2.6455  
1 0 0 0 0 0 0 0 1 0 0 0 0 0 0 2 0 0 0 0 0 0 0 0 7.872  
0 0 0 0 0 0 0 0 0 0 0 0 0 1 0 0 2 0 0 0 0 0 1 0 0 3.108  
0 0 0 0 0 0 0 0 0 0 0 1 0 0 2 0 1 0 0 0 0 0 0 0 -10.0365  
0 0 0 0 0 0 0 0 0 1 0 0 0 0 2 0 1 0 0 0 0 0 0 0 4.5775  
0 0 0 0 0 0 0 0 0 1 0 1 0 0 2 0 0 0 0 0 0 0 0 0 -3.636  
0 0 0 0 1 0 0 1 0 0 0 0 0 0 2 0 0 0 0 0 0 0 0 0 2.1465  
0 0 0 0 0 0 0 0 0 0 0 0 0 1 0 2 0 0 0 0 0 0 0 1 -2.158  
0 0 0 0 0 0 0 0 0 0 0 0 0 1 0 2 1 0 0 0 0 0 0 0 -5.528  
0 0 0 0 0 0 0 0 0 0 0 1 0 0 0 2 1 0 0 0 0 0 0 0 12.3215  
0 0 0 0 0 0 0 0 0 0 1 0 1 0 2 0 0 0 0 0 0 0 0 0 -5.134  
0 0 0 0 0 0 0 0 0 0 0 0 0 0 2 0 0 1 0 1 0 0 0 0 -3.0165  
0 0 0 1 0 0 0 0 0 0 0 0 0 0 2 0 0 0 0 0 1 0 0 0 1.532  
0 0 0 1 0 0 0 0 0 0 0 0 0 0 0 0 0 1 0 0 0 0 2 -2.181  
0 0 0 1 0 0 0 0 0 0 0 0 0 0 0 0 0 1 2 0 0 0 0 2.2915  
0 0 0 1 0 0 0 0 0 2 0 0 0 0 0 0 0 0 1 0 0 0 0 2.6845  
0 0 0 1 0 0 0 0 0 0 0 0 0 0 0 0 0 1 0 0 2 0 0 -2.398  
0 0 0 1 0 0 0 0 0 0 0 0 0 0 0 2 1 0 0 0 0 0 0 1.5815  
0 0 0 1 0 0 0 0 0 0 0 2 0 0 0 0 0 1 0 0 0 0 0 1.609  
0 0 0 1 0 0 0 0 0 2 0 0 0 0 0 0 0 1 0 0 0 0 0 -1.93  
0 0 0 1 0 0 0 0 0 0 0 0 0 0 0 0 0 1 0 0 0 2 0 -2.2055  
0 0 0 1 0 0 0 0 0 0 0 0 0 0 0 2 0 1 0 0 0 0 0 2.513  
0 0 0 1 0 0 0 0 0 0 0 2 0 0 0 0 0 1 0 0 0 0 0 7.2425  
0 0 0 1 0 0 0 0 0 0 2 0 0 0 0 0 0 1 0 0 0 0 0 2.448  
0 0 0 1 0 0 0 0 0 0 0 0 0 0 0 0 0 1 0 2 0 0 0 -2.477  
0 0 0 1 0 0 0 0 0 0 0 0 0 0 1 0 0 0 0 0 0 0 2 7.262  
0 0 0 1 0 0 0 0 0 0 0 0 0 2 1 0 0 0 0 0 0 0 0 -2.97  
0 0 0 1 0 0 0 2 0 0 0 0 0 0 1 0 0 0 0 0 0 0 0 -1.929  
2 0 0 1 0 0 0 0 0 0 0 0 0 0 0 1 0 0 0 0 0 0 0 -1.9655  
0 0 0 1 0 0 2 0 0 0 0 0 0 0 1 0 0 0 0 0 0 0 0 -2.4685  
0 0 0 1 0 0 0 0 0 0 0 0 0 0 1 0 0 0 0 0 2 0 0 7.4575  
0 0 0 1 0 0 0 0 0 0 0 0 0 0 1 0 2 0 0 0 0 0 0 -1.513  
0 0 0 1 0 0 0 0 0 0 0 2 0 0 1 0 0 0 0 0 0 0 0 -1.809  
0 0 0 1 0 0 0 2 0 0 0 0 0 0 1 0 0 0 0 0 0 0 0 -2.1895  
0 0 0 1 0 0 0 0 0 0 0 0 0 0 1 0 0 0 0 0 0 2 0 7.2245  
0 0 0 1 0 0 0 0 0 0 0 0 0 0 1 2 0 0 0 0 0 0 0 -2.7135  
0 0 0 1 0 0 0 0 0 0 2 0 0 0 1 0 0 0 0 0 0 0 0 -1.8145  
0 0 0 1 0 0 0 0 0 0 0 0 0 0 1 0 0 0 0 2 0 0 0 7.385  
0 0 0 1 0 0 0 0 0 0 0 0 0 0 2 0 0 0 0 1 0 0 0 1.895  
0 0 0 2 0 0 0 0 0 0 0 0 0 1 0 0 0 0 1 0 0 0 0 -1.6485  
0 0 0 2 0 0 0 0 0 1 0 0 0 0 0 0 0 0 1 0 0 0 0 -1.699  
0 0 0 2 0 0 0 0 0 0 0 0 1 0 0 1 0 0 0 0 0 0 0 1.558  
0 0 0 2 0 0 0 0 0 0 1 0 0 0 0 1 0 0 0 0 0 0 0 1.873  
0 0 0 2 0 0 0 0 0 0 1 0 1 0 0 0 0 0 0 0 0 0 0 -2.083  
0 0 0 0 2 0 0 0 0 0 0 0 0 0 0 0 0 0 1 0 0 0 1 -3.64  
0 0 0 0 2 0 0 0 0 0 0 0 0 1 0 0 0 0 1 0 0 0 0 -7.9725  
0 0 0 0 2 0 0 0 1 0 0 0 0 0 0 0 0 0 0 0 0 1 -1.921  
0 0 0 0 2 0 0 0 1 0 0 0 0 0 0 0 0 0 1 0 0 0 0 -2.2125  
0 0 0 0 2 0 0 0 1 0 0 0 0 1 0 0 0 0 0 0 0 0 0 4.4905  
0 0 1 0 2 0 0 0 0 0 0 0 0 0 0 0 0 0 1 0 0 0 0 7.6905  
0 0 1 0 2 0 0 0 0 0 0 0 0 1 0 0 0 0 0 0 0 0 0 -8.9085  
0 0 1 0 2 0 0 0 1 0 0 0 0 0 0 0 0 0 0 0 0 0 0 -3.306  
1 0 0 0 2 0 0 1 0 0 0 0 0 0 0 0 0 0 0 0 0 0 0 66.641  
0 0 0 0 2 0 0 0 0 0 0 1 0 0 0 0 0 0 0 0 0 1 0 0 1.541  
0 0 0 0 2 0 0 0 0 0 1 0 0 0 0 1 0 0 0 0 0 0 0 -9.6865  
0 0 0 0 2 0 0 0 1 0 0 0 0 0 0 1 0 0 0 0 0 0 0 4.8285  
0 0 0 0 2 0 0 0 1 0 1 0 0 0 0 0 0 0 0 0 0 0 0 -4.308  
0 0 0 0 1 2 0 1 0 0 0 0 0 0 0 0 0 0 0 0 0 0 0 23.666  
0 0 0 0 2 0 0 0 0 0 0 0 0 0 1 0 0 0 0 0 0 1 0 2.401  
0 0 0 0 2 0 0 0 0 0 0 0 1 0 0 0 0 0 0 0 0 1 0 -4.3525  
0 0 0 0 2 0 0 0 0 0 0 1 0 0 1 0 0 0 0 0 0 0 0 -4.3025  
0 0 0 0 2 0 0 0 0 0 1 0 0 0 0 1 0 0 0 0 0 0 0 11.457  
0 0 0 0 2 0 0 0 0 0 1 0 1 0 0 0 0 0 0 0 0 0 0 -3.1855  
0 0 0 0 2 0 0 0 0 0 0 0 0 0 0 0 0 1 0 1 0 0 0 -3.474

```

0 0 0 0 0 2 0 0 0 0 0 0 0 0 0 0 1 0 0 1 0 0 0 0 0 -5.795
0 0 0 1 0 2 0 0 0 0 0 0 0 0 0 0 0 0 1 0 0 0 0 0 1.9535
0 0 0 1 0 2 0 0 0 0 0 0 0 0 0 0 1 0 0 0 0 0 0 0 0 -3.46
0 1 0 0 0 1 0 0 0 0 0 0 0 0 0 0 0 0 0 0 0 0 0 0 2 17.788
0 1 0 0 0 1 0 0 0 0 0 0 0 0 0 0 0 0 0 0 2 0 0 0 0 -2.088
0 1 0 0 0 1 0 0 2 0 0 0 0 0 0 0 0 0 0 0 0 0 0 0 0 -14.1455
2 1 0 0 0 1 0 0 0 0 0 0 0 0 0 0 0 0 0 0 0 0 0 0 0 -7.604
0 1 0 0 0 1 2 0 0 0 0 0 0 0 0 0 0 0 0 0 0 0 0 0 0 -15.0835
0 1 0 0 0 1 0 0 0 0 0 0 0 0 0 0 0 0 0 0 0 0 2 0 0 18.078
0 1 0 0 0 1 0 0 0 0 0 0 0 0 0 0 0 0 2 0 0 0 0 0 0 -2.836
0 1 0 0 0 1 0 2 0 0 0 0 0 0 0 0 0 0 0 0 0 0 0 0 0 -16.0825
0 1 0 0 0 1 0 0 0 0 0 0 0 0 0 0 0 0 0 0 0 0 2 0 0 17.922
0 1 0 0 0 1 0 0 0 0 0 0 0 0 2 0 0 0 0 0 0 0 0 0 0 -2.5135
0 1 0 0 0 1 0 0 0 0 0 0 0 0 0 0 0 0 0 0 2 0 0 0 0 18.2905
0 1 0 0 0 1 0 0 0 0 0 0 0 0 0 0 0 0 2 0 0 0 0 0 0 -2.6935
0 1 0 0 0 1 0 0 0 0 0 0 0 0 0 2 0 0 0 0 0 0 0 0 0 -1.5335
0 2 0 0 0 0 0 0 0 0 0 0 0 0 0 1 0 0 0 0 1 0 0 0 0 -1.908
0 2 0 0 0 0 0 0 0 1 0 0 0 0 0 0 0 0 0 1 0 0 0 0 0 5.605
0 2 0 0 0 0 0 0 0 1 0 0 0 0 1 0 0 0 0 0 0 0 0 0 0 3.892
1 2 0 0 0 0 0 0 1 0 0 0 0 0 0 0 0 0 0 0 0 0 0 0 0 1.9365
0 2 0 0 0 0 0 0 0 0 0 1 0 0 0 0 1 0 0 0 0 0 0 0 0 -3.6365
0 2 0 0 0 0 0 0 0 0 1 0 0 0 0 0 0 1 0 0 0 0 0 0 0 2.2875
0 2 0 0 0 0 0 0 0 0 1 0 1 0 0 0 0 0 0 0 0 0 0 0 0 2.076
0 2 0 0 0 0 0 0 0 0 0 1 0 1 0 0 0 0 0 0 0 0 0 0 0 4.8215
0 2 0 0 0 0 0 0 0 0 0 0 0 0 0 1 0 0 1 0 0 0 0 0 0 -3.7665
0 2 0 1 0 0 0 0 0 0 0 0 0 0 0 0 0 0 1 0 0 0 0 0 0 -2.1055

```

**Listing 5** C<sub>4</sub>H<sub>4</sub>N<sub>2</sub>: Coriolis coefficients at the b3lyp/6-31+G\*\* level of theory<sup>1</sup>

Coriolis coeffs C4H4N2 (pyrazine) – CCB3 – (Sorted By energy)

350.4917 422.4854 600.9536 707.7344 764.053 804.6875 942.503 980.9775 992.3867 1027.0025

1032.046 1082.5146 1156.452 1185.6626 1249.1209 1366.7569 1435.378 1511.3524 1565.9724

1623.8067 3172.9773 3174.1274 3190.2977 3195.2832

0.2132961965359373 0.1972604384699417 0.1024825504307146

29 30 36

```

0 6 23 -0.832870
0 6 19 -0.348160
0 6 14 0.277750
0 6 9 0.230410
0 6 2 0.234260
0 21 8 -0.796690
0 21 0 -0.319240
0 17 8 0.553130
0 17 0 -0.239790
0 12 8 0.059240
0 12 0 -0.867160
0 10 8 0.236270
0 10 0 -0.297680
0 20 7 -0.830700
0 20 4 -0.184390
0 18 7 -0.343780
0 18 4 0.826730
0 15 7 0.425260
0 15 4 0.395400
0 3 7 -0.104440
0 3 4 0.355220
0 5 22 -0.843480
0 5 16 0.373910
0 5 13 -0.198200
0 5 11 0.330840
0 1 22 0.088230
0 1 16 -0.517800
0 1 13 -0.778380
0 1 11 0.343840
1 7 23 0.519680
1 7 19 -0.658590
1 7 14 0.501520
1 7 9 0.079830

```

|   |    |    |           |
|---|----|----|-----------|
| 1 | 7  | 2  | 0.195710  |
| 1 | 4  | 23 | 0.091200  |
| 1 | 4  | 19 | 0.651850  |
| 1 | 4  | 14 | 0.542300  |
| 1 | 4  | 9  | 0.153450  |
| 1 | 4  | 2  | 0.499140  |
| 1 | 22 | 8  | 0.498640  |
| 1 | 22 | 0  | 0.179210  |
| 1 | 16 | 8  | 0.762150  |
| 1 | 16 | 0  | -0.105870 |
| 1 | 13 | 8  | -0.366350 |
| 1 | 13 | 0  | 0.469720  |
| 1 | 11 | 8  | 0.190460  |
| 1 | 11 | 0  | 0.857930  |
| 1 | 20 | 6  | 0.506370  |
| 1 | 18 | 6  | -0.341760 |
| 1 | 15 | 6  | 0.763920  |
| 1 | 3  | 6  | 0.207910  |
| 1 | 5  | 21 | 0.510430  |
| 1 | 5  | 17 | 0.743520  |
| 1 | 5  | 12 | -0.423250 |
| 1 | 5  | 10 | 0.086620  |
| 1 | 1  | 21 | -0.053200 |
| 1 | 1  | 17 | 0.289360  |
| 1 | 1  | 12 | 0.255700  |
| 1 | 1  | 10 | -0.920900 |
| 2 | 22 | 21 | -0.019250 |
| 2 | 22 | 17 | 0.834450  |
| 2 | 22 | 12 | -0.505430 |
| 2 | 22 | 10 | 0.218780  |
| 2 | 16 | 21 | 0.791800  |
| 2 | 16 | 17 | -0.318770 |
| 2 | 16 | 12 | 0.427610  |
| 2 | 16 | 10 | -0.297640 |
| 2 | 13 | 21 | -0.201670 |
| 2 | 13 | 17 | -0.057320 |
| 2 | 13 | 12 | -0.313880 |
| 2 | 13 | 10 | -0.926030 |
| 2 | 11 | 21 | 0.576210  |
| 2 | 11 | 17 | 0.445860  |
| 2 | 11 | 12 | 0.680570  |
| 2 | 11 | 10 | 0.077590  |
| 2 | 20 | 23 | -0.015440 |
| 2 | 20 | 19 | -0.583750 |
| 2 | 20 | 14 | 0.737350  |
| 2 | 20 | 9  | 0.217130  |
| 2 | 20 | 2  | -0.261080 |
| 2 | 18 | 23 | -0.364740 |
| 2 | 18 | 19 | 0.606620  |
| 2 | 18 | 14 | -0.207190 |
| 2 | 18 | 9  | -0.166200 |
| 2 | 18 | 2  | 0.654550  |
| 2 | 15 | 23 | 0.916140  |
| 2 | 15 | 19 | 0.204490  |
| 2 | 15 | 14 | -0.054180 |
| 2 | 15 | 9  | 0.093180  |
| 2 | 15 | 2  | 0.327500  |
| 2 | 3  | 23 | -0.077850 |
| 2 | 3  | 19 | -0.498640 |
| 2 | 3  | 14 | -0.601410 |
| 2 | 3  | 9  | -0.036170 |
| 2 | 3  | 2  | 0.618300  |

**Listing 6** C<sub>4</sub>H<sub>4</sub>N<sub>2</sub>: dipole moment surface coefficients at the b3lyp/6-31+G\*\* level of theory (in a.u.)<sup>1</sup>

DMS C4H4N2 (pyrazine) – CCB3 – (Sorted By energy)

line 1 : dimension numberOfElements

line x : index[dimension] C\_x C\_y C\_z







## 2 Full numerical results

### 2.1 C<sub>2</sub>H<sub>4</sub>O

**Table 1** Reference calculation for the PES operator with  $F = 200$  eigenvalues of C<sub>2</sub>H<sub>4</sub>O. The parameters are  $p = 8$ ,  $E_{max} = 25000\text{cm}^{-1}$  and  $\epsilon = 0.005$ .

| Number | Eigenvalue | Frequency | Intensity | Assignment                                                        |
|--------|------------|-----------|-----------|-------------------------------------------------------------------|
| 1      | 13254.34   | 792.73    | 0.12      | $\omega_1(0.97), \omega_1 + \omega_9(0.14)$                       |
| 2      | 13283.56   | 821.95    | 12.88     | $\omega_2(0.96), \omega_2 + \omega_9(0.16)$                       |
| 3      | 13339.91   | 878.30    | 79.00     | $\omega_3(0.97), \omega_3 + \omega_9(0.17)$                       |
| 4      | 13479.19   | 1017.58   | 0.00      | $\omega_4(0.97), \omega_4 + \omega_9(0.14)$                       |
| 5      | 13583.38   | 1121.76   | 0.79      | $\omega_6(0.96), \omega_6 + \omega_9(0.14)$                       |
| 6      | 13585.84   | 1124.23   | 0.05      | $\omega_5(0.97), \omega_5 + \omega_9(0.14)$                       |
| 7      | 13607.90   | 1146.29   | 3.81      | $\omega_7(0.97), \omega_7 + \omega_9(0.15)$                       |
| 8      | 13610.14   | 1148.53   | 0.00      | $\omega_8(0.97), \omega_8 + \omega_9(0.14)$                       |
| 9      | 13732.88   | 1271.27   | 15.41     | $\omega_9(0.94), 2\omega_9(0.22)$                                 |
| 10     | 13929.61   | 1468.00   | 0.11      | $\omega_{10}(0.97), \omega_9 + \omega_{10}(0.13)$                 |
| 11     | 13957.45   | 1495.83   | 3.80      | $\omega_{11}(0.94), 2\omega_1(0.2)$                               |
| 12     | 14049.62   | 1588.01   | 0.39      | $2\omega_1(0.94), \omega_{11}(0.18)$                              |
| 13     | 14073.30   | 1611.69   | 0.00      | $\omega_1 + \omega_2(0.96), \omega_1 + \omega_2 + \omega_9(0.16)$ |
| 14     | 14103.11   | 1641.50   | 0.44      | $2\omega_2(0.92), 2\omega_2 + \omega_9(0.18)$                     |
| 15     | 14132.52   | 1670.91   | 0.00      | $\omega_1 + \omega_3(0.96), \omega_1 + \omega_3 + \omega_9(0.18)$ |
| 16     | 14157.09   | 1695.48   | 0.34      | $\omega_2 + \omega_3(0.94), \omega_2 + \omega_3 + \omega_9(0.19)$ |
| 17     | 14216.83   | 1755.22   | 0.06      | $2\omega_3(0.94), 2\omega_3 + \omega_9(0.21)$                     |
| 18     | 14267.85   | 1806.24   | 0.10      | $\omega_1 + \omega_4(0.96), \omega_1 + \omega_4 + \omega_9(0.15)$ |
| 19     | 14294.49   | 1832.88   | 0.53      | $\omega_2 + \omega_4(0.94), \omega_2 + \omega_4 + \omega_9(0.17)$ |
| 20     | 14351.27   | 1889.66   | 0.11      | $\omega_3 + \omega_4(0.92), \omega_1 + \omega_5(0.27)$            |
| 21     | 14369.26   | 1907.65   | 1.36      | $\omega_1 + \omega_5(0.9), \omega_3 + \omega_4(0.27)$             |
| 22     | 14371.20   | 1909.59   | 0.48      | $\omega_1 + \omega_6(0.93), \omega_2 + \omega_4(0.14)$            |
| 23     | 14389.65   | 1928.04   | 0.28      | $\omega_1 + \omega_8(0.82), \omega_2 + \omega_6(0.45)$            |
| 24     | 14399.77   | 1938.16   | 0.04      | $\omega_1 + \omega_7(0.86), \omega_2 + \omega_5(0.43)$            |
| 25     | 14401.33   | 1939.72   | 0.47      | $\omega_2 + \omega_6(0.81), \omega_1 + \omega_8(0.47)$            |
| 26     | 14405.54   | 1943.93   | 0.02      | $\omega_2 + \omega_5(0.85), \omega_1 + \omega_7(0.44)$            |
| 27     | 14423.45   | 1961.84   | 0.01      | $\omega_2 + \omega_7(0.94), \omega_2 + \omega_7 + \omega_9(0.17)$ |
| 28     | 14432.21   | 1970.60   | 0.01      | $\omega_2 + \omega_8(0.96), \omega_2 + \omega_8 + \omega_9(0.17)$ |
| 29     | 14459.00   | 1997.39   | 1.24      | $\omega_3 + \omega_6(0.95), \omega_3 + \omega_6 + \omega_9(0.18)$ |
| 30     | 14460.70   | 1999.09   | 0.17      | $\omega_3 + \omega_5(0.96), \omega_3 + \omega_5 + \omega_9(0.18)$ |
| 31     | 14482.72   | 2021.11   | 0.21      | $\omega_3 + \omega_7(0.96), \omega_3 + \omega_7 + \omega_9(0.19)$ |
| 32     | 14485.66   | 2024.05   | 0.00      | $\omega_3 + \omega_8(0.96), \omega_3 + \omega_8 + \omega_9(0.18)$ |
| 33     | 14493.53   | 2031.92   | 0.00      | $2\omega_4(0.96), 2\omega_4 + \omega_9(0.16)$                     |
| 34     | 14522.17   | 2060.56   | 0.13      | $\omega_1 + \omega_9(0.93), \omega_1 + 2\omega_9(0.23)$           |
| 35     | 14548.10   | 2086.49   | 0.07      | $\omega_2 + \omega_9(0.91), \omega_2 + 2\omega_9(0.25)$           |
| 36     | 14589.45   | 2127.84   | 0.49      | $\omega_4 + \omega_6(0.92), \omega_4 + \omega_6 + \omega_9(0.15)$ |
| 37     | 14595.87   | 2134.26   | 0.57      | $\omega_4 + \omega_5(0.93), \omega_4 + \omega_5 + \omega_9(0.15)$ |
| 38     | 14602.41   | 2140.79   | 0.02      | $\omega_3 + \omega_9(0.9), \omega_3 + 2\omega_9(0.27)$            |
| 39     | 14613.64   | 2152.03   | 1.53      | $\omega_4 + \omega_7(0.92), \omega_5 + \omega_6(0.22)$            |
| 40     | 14626.75   | 2165.14   | 0.13      | $\omega_4 + \omega_8(0.96), \omega_4 + \omega_8 + \omega_9(0.15)$ |
| 41     | 14694.63   | 2233.01   | 0.04      | $2\omega_6(0.83), 2\omega_5(0.41)$                                |
| 42     | 14701.98   | 2240.37   | 1.29      | $\omega_5 + \omega_6(0.91), \omega_4 + \omega_7(0.24)$            |
| 43     | 14708.00   | 2246.39   | 0.00      | $\omega_1 + \omega_{10}(0.83), \omega_6 + \omega_8(0.41)$         |
| 44     | 14709.65   | 2248.04   | 0.03      | $2\omega_5(0.86), 2\omega_6(0.42)$                                |
| 45     | 14725.44   | 2263.83   | 0.06      | $\omega_5 + \omega_8(0.7), \omega_1 + \omega_{11}(0.56)$          |
| 46     | 14728.27   | 2266.66   | 0.12      | $\omega_5 + \omega_7(0.85), \omega_4 + \omega_9(0.36)$            |
| 47     | 14728.27   | 2266.66   | 0.10      | $\omega_6 + \omega_7(0.91), \omega_5 + \omega_8(0.2)$             |
| 48     | 14735.71   | 2274.09   | 0.17      | $\omega_6 + \omega_8(0.85), \omega_1 + \omega_{10}(0.44)$         |
| 49     | 14743.95   | 2282.34   | 0.06      | $\omega_1 + \omega_{11}(0.67), \omega_5 + \omega_8(0.63)$         |
| 50     | 14749.97   | 2288.36   | 0.01      | $\omega_2 + \omega_{10}(0.88), 2\omega_7(0.35)$                   |
| 51     | 14751.19   | 2289.58   | 0.00      | $\omega_4 + \omega_9(0.84), \omega_5 + \omega_7(0.41)$            |
| 52     | 14751.53   | 2289.92   | 0.07      | $2\omega_7(0.84), \omega_2 + \omega_{10}(0.36)$                   |
| 53     | 14754.36   | 2292.75   | 0.14      | $\omega_7 + \omega_8(0.96), \omega_7 + \omega_8 + \omega_9(0.16)$ |
| 54     | 14756.92   | 2295.31   | 0.02      | $2\omega_8(0.91), 2\omega_7(0.31)$                                |

Table 1 (continued)

| Number | Eigenvalue | Frequency | Intensity | Assignment                                                                              |
|--------|------------|-----------|-----------|-----------------------------------------------------------------------------------------|
| 55     | 14772.47   | 2310.86   | 0.54      | $\omega_2 + \omega_{11}(0.9), 3\omega_2(0.19)$                                          |
| 56     | 14807.28   | 2345.67   | 0.15      | $\omega_3 + \omega_{10}(0.96), \omega_3 + \omega_9 + \omega_{10}(0.17)$                 |
| 57     | 14832.07   | 2370.46   | 0.02      | $\omega_3 + \omega_{11}(0.9), 2\omega_1 + \omega_3(0.18)$                               |
| 58     | 14840.95   | 2379.34   | 0.00      | $3\omega_1(0.88), \omega_1 + \omega_{11}(0.29)$                                         |
| 59     | 14850.38   | 2388.77   | 0.24      | $\omega_6 + \omega_9(0.9), \omega_6 + 2\omega_9(0.23)$                                  |
| 60     | 14852.06   | 2390.45   | 0.15      | $\omega_5 + \omega_9(0.92), \omega_5 + 2\omega_9(0.23)$                                 |
| 61     | 14863.46   | 2401.85   | 0.00      | $2\omega_1 + \omega_2(0.92), 2\omega_1 + \omega_2 + \omega_9(0.16)$                     |
| 62     | 14876.39   | 2414.78   | 0.37      | $\omega_7 + \omega_9(0.92), \omega_7 + 2\omega_9(0.24)$                                 |
| 63     | 14877.26   | 2415.65   | 0.00      | $\omega_8 + \omega_9(0.93), \omega_8 + 2\omega_9(0.23)$                                 |
| 64     | 14889.68   | 2428.07   | 0.01      | $\omega_1 + 2\omega_2(0.9), \omega_1 + 2\omega_2 + \omega_9(0.18)$                      |
| 65     | 14919.48   | 2457.87   | 0.04      | $3\omega_2(0.85), \omega_2 + \omega_{11}(0.24)$                                         |
| 66     | 14926.27   | 2464.66   | 0.00      | $2\omega_1 + \omega_3(0.93), 2\omega_1 + \omega_3 + \omega_9(0.18)$                     |
| 67     | 14942.95   | 2481.34   | 0.07      | $\omega_4 + \omega_{10}(0.96), \omega_4 + \omega_9 + \omega_{10}(0.14)$                 |
| 68     | 14945.59   | 2483.98   | 0.00      | $\omega_1 + \omega_2 + \omega_3(0.93), \omega_1 + \omega_2 + \omega_3 + \omega_9(0.2)$  |
| 69     | 14968.29   | 2506.68   | 0.00      | $\omega_4 + \omega_{11}(0.92), 2\omega_1 + \omega_4(0.2)$                               |
| 70     | 14971.62   | 2510.01   | 0.01      | $2\omega_2 + \omega_3(0.86), 2\omega_2 + \omega_3 + \omega_9(0.2)$                      |
| 71     | 14998.82   | 2537.21   | 0.00      | $2\omega_9(0.88), 3\omega_9(0.3)$                                                       |
| 72     | 15008.30   | 2546.69   | 0.00      | $\omega_1 + 2\omega_3(0.94), \omega_1 + 2\omega_3 + \omega_9(0.21)$                     |
| 73     | 15028.79   | 2567.18   | 0.00      | $\omega_2 + 2\omega_3(0.9), \omega_2 + 2\omega_3 + \omega_9(0.22)$                      |
| 74     | 15044.84   | 2583.23   | 0.36      | $\omega_6 + \omega_{10}(0.93), \omega_5 + \omega_{11}(0.22)$                            |
| 75     | 15048.72   | 2587.10   | 0.15      | $\omega_5 + \omega_{10}(0.92), \omega_6 + \omega_{11}(0.27)$                            |
| 76     | 15055.08   | 2593.47   | 0.00      | $2\omega_1 + \omega_4(0.9), \omega_4 + \omega_{11}(0.18)$                               |
| 77     | 15061.05   | 2599.43   | 0.00      | $\omega_7 + \omega_{10}(0.85), \omega_8 + \omega_{11}(0.39)$                            |
| 78     | 15063.11   | 2601.49   | 0.74      | $\omega_8 + \omega_{10}(0.86), \omega_7 + \omega_{11}(0.38)$                            |
| 79     | 15073.17   | 2611.56   | 0.02      | $\omega_6 + \omega_{11}(0.76), \omega_1 + \omega_2 + \omega_4(0.41)$                    |
| 80     | 15077.30   | 2615.69   | 0.20      | $\omega_5 + \omega_{11}(0.89), \omega_6 + \omega_{10}(0.24)$                            |
| 81     | 15077.48   | 2615.87   | 0.01      | $\omega_1 + \omega_2 + \omega_4(0.81), \omega_6 + \omega_{11}(0.42)$                    |
| 82     | 15091.45   | 2629.83   | 0.00      | $3\omega_3(0.92), 3\omega_3 + \omega_9(0.24)$                                           |
| 83     | 15102.26   | 2640.65   | 0.00      | $\omega_8 + \omega_{11}(0.82), \omega_7 + \omega_{10}(0.42)$                            |
| 84     | 15102.58   | 2640.97   | 1.65      | $\omega_7 + \omega_{11}(0.84), \omega_8 + \omega_{10}(0.41)$                            |
| 85     | 15107.17   | 2645.56   | 0.01      | $2\omega_2 + \omega_4(0.87), 2\omega_2 + \omega_4 + \omega_9(0.18)$                     |
| 86     | 15136.54   | 2674.93   | 0.02      | $\omega_1 + \omega_3 + \omega_4(0.83), 2\omega_1 + \omega_5(0.4)$                       |
| 87     | 15153.19   | 2691.58   | 0.02      | $2\omega_1 + \omega_5(0.78), \omega_1 + \omega_3 + \omega_4(0.44)$                      |
| 88     | 15158.23   | 2696.62   | 0.00      | $2\omega_1 + \omega_6(0.86), \omega_1 + \omega_2 + \omega_4(0.22)$                      |
| 89     | 15161.58   | 2699.97   | 0.00      | $\omega_2 + \omega_3 + \omega_4(0.89), \omega_1 + \omega_2 + \omega_5(0.21)$            |
| 90     | 15171.04   | 2709.43   | 0.00      | $2\omega_1 + \omega_8(0.76), \omega_1 + \omega_2 + \omega_6(0.43)$                      |
| 91     | 15181.04   | 2719.43   | 0.08      | $\omega_1 + \omega_2 + \omega_5(0.84), 2\omega_1 + \omega_7(0.26)$                      |
| 92     | 15188.43   | 2726.82   | 0.00      | $\omega_1 + \omega_2 + \omega_6(0.77), 2\omega_1 + \omega_8(0.46)$                      |
| 93     | 15195.35   | 2733.74   | 0.18      | $2\omega_1 + \omega_7(0.89), \omega_1 + \omega_2 + \omega_5(0.27)$                      |
| 94     | 15198.62   | 2737.01   | 0.02      | $\omega_9 + \omega_{10}(0.93), 2\omega_9 + \omega_{10}(0.22)$                           |
| 95     | 15204.06   | 2742.45   | 0.04      | $\omega_1 + \omega_2 + \omega_8(0.66), 2\omega_2 + \omega_6(0.59)$                      |
| 96     | 15212.07   | 2750.46   | 0.02      | $\omega_1 + \omega_2 + \omega_7(0.87), 2\omega_2 + \omega_5(0.31)$                      |
| 97     | 15217.73   | 2756.12   | 0.02      | $\omega_1 + \omega_2 + \omega_8(0.65), 2\omega_2 + \omega_6(0.61)$                      |
| 98     | 15220.98   | 2759.37   | 0.01      | $2\omega_2 + \omega_5(0.85), \omega_1 + \omega_2 + \omega_7(0.33)$                      |
| 99     | 15221.80   | 2760.19   | 0.00      | $2\omega_3 + \omega_4(0.88), \omega_1 + \omega_3 + \omega_5(0.3)$                       |
| 100    | 15224.44   | 2762.82   | 0.11      | $\omega_9 + \omega_{11}(0.88), 2\omega_9 + \omega_{11}(0.22)$                           |
| 101    | 15236.09   | 2774.48   | 0.18      | $2\omega_2 + \omega_7(0.88), 2\omega_2 + \omega_7 + \omega_9(0.19)$                     |
| 102    | 15244.37   | 2782.76   | 0.00      | $\omega_1 + \omega_3 + \omega_5(0.87), 2\omega_3 + \omega_4(0.3)$                       |
| 103    | 15245.80   | 2784.19   | 0.00      | $\omega_1 + \omega_3 + \omega_6(0.91), \omega_1 + \omega_3 + \omega_6 + \omega_9(0.18)$ |
| 104    | 15251.02   | 2789.41   | 0.00      | $2\omega_2 + \omega_8(0.91), 2\omega_2 + \omega_8 + \omega_9(0.19)$                     |
| 105    | 15263.55   | 2801.94   | 0.00      | $\omega_1 + \omega_3 + \omega_8(0.72), \omega_2 + \omega_3 + \omega_6(0.55)$            |
| 106    | 15271.91   | 2810.30   | 0.00      | $\omega_2 + \omega_3 + \omega_5(0.73), \omega_1 + \omega_3 + \omega_7(0.58)$            |
| 107    | 15273.34   | 2811.73   | 0.00      | $\omega_2 + \omega_3 + \omega_6(0.7), \omega_1 + \omega_3 + \omega_8(0.58)$             |
| 108    | 15275.59   | 2813.97   | 0.00      | $\omega_1 + 2\omega_4(0.93), \omega_1 + 2\omega_4 + \omega_9(0.16)$                     |
| 109    | 15276.86   | 2815.25   | 0.00      | $\omega_1 + \omega_3 + \omega_7(0.75), \omega_2 + \omega_3 + \omega_5(0.56)$            |
| 110    | 15293.46   | 2831.85   | 0.00      | $\omega_2 + \omega_3 + \omega_7(0.9), \omega_2 + \omega_3 + \omega_7 + \omega_9(0.2)$   |
| 111    | 15301.27   | 2839.66   | 0.11      | $\omega_2 + 2\omega_4(0.91), \omega_2 + 2\omega_4 + \omega_9(0.17)$                     |
| 112    | 15302.52   | 2840.91   | 0.00      | $\omega_2 + \omega_3 + \omega_8(0.93), \omega_2 + \omega_3 + \omega_8 + \omega_9(0.2)$  |
| 113    | 15312.79   | 2851.18   | 0.04      | $2\omega_1 + \omega_9(0.87), 2\omega_1 + 2\omega_9(0.22)$                               |
| 114    | 15332.73   | 2871.12   | 0.01      | $2\omega_3 + \omega_6(0.92), 2\omega_3 + \omega_6 + \omega_9(0.21)$                     |

Table 1 (continued)

| Number | Eigenvalue | Frequency | Intensity | Assignment                                                                              |
|--------|------------|-----------|-----------|-----------------------------------------------------------------------------------------|
| 115    | 15333.44   | 2871.83   | 0.00      | $\omega_1 + \omega_2 + \omega_9(0.89), \omega_1 + \omega_2 + 2\omega_9(0.26)$           |
| 116    | 15333.70   | 2872.09   | 0.02      | $2\omega_3 + \omega_5(0.93), 2\omega_3 + \omega_5 + \omega_9(0.21)$                     |
| 117    | 15355.70   | 2894.09   | 0.02      | $2\omega_3 + \omega_7(0.93), 2\omega_3 + \omega_7 + \omega_9(0.22)$                     |
| 118    | 15358.94   | 2897.33   | 0.00      | $\omega_3 + 2\omega_4(0.85), \omega_1 + \omega_4 + \omega_5(0.35)$                      |
| 119    | 15359.23   | 2897.62   | 0.00      | $2\omega_3 + \omega_8(0.93), 2\omega_3 + \omega_8 + \omega_9(0.22)$                     |
| 120    | 15361.80   | 2900.19   | 0.12      | $2\omega_2 + \omega_9(0.83), 2\omega_2 + 2\omega_9(0.27)$                               |
| 121    | 15370.18   | 2908.57   | 17.10     | $\omega_{12}(0.6), \omega_{10} + \omega_{11}(0.49)$                                     |
| 122    | 15373.63   | 2912.01   | 2.19      | $\omega_1 + \omega_4 + \omega_5(0.65), \omega_{13}(0.34)$                               |
| 123    | 15374.43   | 2912.82   | 6.27      | $\omega_1 + \omega_4 + \omega_6(0.71), \omega_{10} + \omega_{11}(0.36)$                 |
| 124    | 15379.79   | 2918.17   | 4.03      | $2\omega_{10}(0.65), \omega_{13}(0.45)$                                                 |
| 125    | 15391.07   | 2929.46   | 0.05      | $\omega_1 + \omega_3 + \omega_9(0.88), \omega_1 + \omega_3 + 2\omega_9(0.27)$           |
| 126    | 15393.97   | 2932.36   | 0.36      | $\omega_2 + \omega_4 + \omega_6(0.7), \omega_1 + \omega_4 + \omega_8(0.49)$             |
| 127    | 15399.36   | 2937.75   | 0.00      | $\omega_1 + \omega_4 + \omega_7(0.74), \omega_2 + \omega_4 + \omega_5(0.46)$            |
| 128    | 15406.19   | 2944.58   | 0.26      | $\omega_1 + \omega_4 + \omega_8(0.77), \omega_2 + \omega_4 + \omega_6(0.49)$            |
| 129    | 15409.04   | 2947.43   | 0.00      | $\omega_2 + \omega_4 + \omega_5(0.76), \omega_1 + \omega_4 + \omega_7(0.51)$            |
| 130    | 15413.93   | 2952.31   | 0.00      | $\omega_2 + \omega_3 + \omega_9(0.86), \omega_2 + \omega_3 + 2\omega_9(0.29)$           |
| 131    | 15415.97   | 2954.36   | 6.09      | $2\omega_{10}(0.59), \omega_{13}(0.51)$                                                 |
| 132    | 15425.96   | 2964.35   | 1.29      | $\omega_2 + \omega_4 + \omega_7(0.78), \omega_{13}(0.26)$                               |
| 133    | 15441.49   | 2979.88   | 0.05      | $\omega_2 + \omega_4 + \omega_8(0.92), \omega_2 + \omega_4 + \omega_8 + \omega_9(0.18)$ |
| 134    | 15453.20   | 2991.59   | 18.32     | $\omega_{10} + \omega_{11}(0.62), \omega_{12}(0.53)$                                    |
| 135    | 15457.72   | 2996.11   | 3.89      | $2\omega_{11}(0.71), \omega_{13}(0.39)$                                                 |
| 136    | 15459.01   | 2997.40   | 0.00      | $\omega_3 + \omega_4 + \omega_6(0.88), \omega_1 + \omega_5 + \omega_6(0.18)$            |
| 137    | 15461.74   | 3000.13   | 0.28      | $\omega_3 + \omega_4 + \omega_5(0.67), \omega_1 + 2\omega_5(0.48)$                      |
| 138    | 15470.28   | 3008.67   | 0.00      | $\omega_3 + \omega_4 + \omega_5(0.59), \omega_1 + 2\omega_6(0.51)$                      |
| 139    | 15470.58   | 3008.97   | 0.06      | $2\omega_3 + \omega_9(0.85), 2\omega_3 + 2\omega_9(0.31)$                               |
| 140    | 15478.13   | 3016.52   | 0.00      | $\omega_1 + \omega_5 + \omega_6(0.82), \omega_1 + \omega_4 + \omega_7(0.23)$            |
| 141    | 15483.62   | 3022.01   | 0.22      | $\omega_3 + \omega_4 + \omega_7(0.88), \omega_3 + \omega_5 + \omega_6(0.2)$             |
| 142    | 15489.69   | 3028.08   | 1.65      | $\omega_1 + 2\omega_5(0.64), \omega_1 + 2\omega_6(0.62)$                                |
| 143    | 15490.21   | 3028.60   | 0.03      | $\omega_{14}(0.85), \omega_{13} + \omega_{14}(0.2)$                                     |
| 144    | 15493.81   | 3032.20   | 3.84      | $\omega_1 + \omega_6 + \omega_8(0.54), 2\omega_1 + \omega_{10}(0.53)$                   |
| 145    | 15494.04   | 3032.43   | 0.29      | $\omega_3 + \omega_4 + \omega_8(0.75), \omega_1 + \omega_5 + \omega_8(0.5)$             |
| 146    | 15501.08   | 3039.47   | 0.04      | $\omega_2 + 2\omega_6(0.72), 2\omega_1 + \omega_{10}(0.38)$                             |
| 147    | 15501.71   | 3040.10   | 42.00     | $\omega_{15}(0.8), \omega_1 + 2\omega_8(0.27)$                                          |
| 148    | 15501.74   | 3040.13   | 0.22      | $\omega_1 + \omega_5 + \omega_8(0.62), \omega_3 + \omega_4 + \omega_8(0.55)$            |
| 149    | 15502.49   | 3040.88   | 0.00      | $3\omega_4(0.93), 3\omega_4 + \omega_9(0.16)$                                           |
| 150    | 15509.55   | 3047.94   | 0.00      | $\omega_1 + \omega_5 + \omega_7(0.8), \omega_1 + \omega_4 + \omega_9(0.28)$             |
| 151    | 15511.30   | 3049.69   | 0.00      | $\omega_2 + \omega_5 + \omega_6(0.73), \omega_1 + \omega_6 + \omega_7(0.36)$            |
| 152    | 15514.67   | 3053.06   | 0.00      | $\omega_1 + \omega_6 + \omega_7(0.83), \omega_2 + \omega_5 + \omega_6(0.26)$            |
| 153    | 15519.75   | 3058.14   | 0.16      | $\omega_1 + \omega_6 + \omega_8(0.62), 2\omega_1 + \omega_{10}(0.51)$                   |
| 154    | 15522.78   | 3061.17   | 0.21      | $2\omega_1 + \omega_{11}(0.57), \omega_1 + \omega_5 + \omega_8(0.41)$                   |
| 155    | 15524.00   | 3062.39   | 4.06      | $\omega_1 + \omega_2 + \omega_{10}(0.69), \omega_2 + \omega_6 + \omega_8(0.44)$         |
| 156    | 15524.20   | 3062.59   | 0.01      | $\omega_2 + 2\omega_5(0.85), \omega_2 + 2\omega_6(0.33)$                                |
| 157    | 15528.21   | 3066.60   | 0.00      | $\omega_1 + \omega_7 + \omega_8(0.66), \omega_2 + \omega_6 + \omega_7(0.59)$            |
| 158    | 15528.85   | 3067.24   | 1.88      | $\omega_1 + 2\omega_8(0.76), \omega_1 + \omega_2 + \omega_{10}(0.37)$                   |
| 159    | 15534.76   | 3073.15   | 0.00      | $\omega_1 + \omega_4 + \omega_9(0.83), \omega_1 + \omega_5 + \omega_7(0.34)$            |
| 160    | 15539.22   | 3077.60   | 0.00      | $\omega_1 + \omega_2 + \omega_{11}(0.56), \omega_2 + \omega_5 + \omega_8(0.5)$          |
| 161    | 15540.29   | 3078.68   | 1.98      | $\omega_2 + \omega_5 + \omega_7(0.69), \omega_1 + 2\omega_7(0.39)$                      |
| 162    | 15544.11   | 3082.50   | 0.00      | $\omega_1 + \omega_7 + \omega_8(0.61), \omega_2 + \omega_6 + \omega_7(0.5)$             |
| 163    | 15545.14   | 3083.53   | 0.00      | $\omega_1 + 2\omega_7(0.85), \omega_2 + \omega_5 + \omega_7(0.28)$                      |
| 164    | 15552.76   | 3091.15   | 0.17      | $\omega_2 + \omega_6 + \omega_8(0.79), \omega_1 + \omega_2 + \omega_{10}(0.41)$         |
| 165    | 15559.09   | 3097.48   | 0.00      | $\omega_2 + \omega_5 + \omega_8(0.74), \omega_1 + \omega_2 + \omega_{11}(0.53)$         |
| 166    | 15560.65   | 3099.03   | 0.02      | $\omega_2 + 2\omega_7(0.9), \omega_2 + 2\omega_7 + \omega_9(0.18)$                      |
| 167    | 15561.18   | 3099.57   | 0.00      | $\omega_2 + \omega_4 + \omega_9(0.76), \omega_2 + \omega_5 + \omega_7(0.46)$            |
| 168    | 15567.02   | 3105.40   | 0.00      | $\omega_3 + 2\omega_6(0.79), \omega_3 + 2\omega_5(0.43)$                                |
| 169    | 15568.30   | 3106.69   | 0.13      | $2\omega_2 + \omega_{10}(0.9), 2\omega_2 + \omega_9 + \omega_{10}(0.17)$                |
| 170    | 15569.60   | 3107.99   | 0.00      | $\omega_2 + \omega_7 + \omega_8(0.92), \omega_2 + \omega_7 + \omega_8 + \omega_9(0.18)$ |
| 171    | 15573.51   | 3111.90   | 0.00      | $\omega_3 + \omega_5 + \omega_6(0.88), \omega_3 + \omega_4 + \omega_7(0.23)$            |
| 172    | 15578.37   | 3116.76   | 0.01      | $\omega_2 + 2\omega_8(0.93), \omega_2 + 2\omega_8 + \omega_9(0.18)$                     |
| 173    | 15580.97   | 3119.36   | 0.00      | $\omega_3 + 2\omega_5(0.83), \omega_3 + 2\omega_6(0.45)$                                |
| 174    | 15583.97   | 3122.36   | 0.00      | $\omega_1 + \omega_3 + \omega_{10}(0.76), \omega_3 + \omega_6 + \omega_8(0.44)$         |

Table 1 (continued)

| Number | Eigenvalue | Frequency | Intensity | Assignment                                                                                    |
|--------|------------|-----------|-----------|-----------------------------------------------------------------------------------------------|
| 175    | 15586.45   | 3124.84   | 0.02      | $2\omega_2 + \omega_{11}(0.82), 4\omega_2(0.24)$                                              |
| 176    | 15590.30   | 3128.69   | 0.01      | $2\omega_4 + \omega_6(0.87), \omega_1 + \omega_4 + \omega_5(0.18)$                            |
| 177    | 15597.91   | 3136.30   | 0.00      | $\omega_3 + \omega_5 + \omega_7(0.76), \omega_3 + \omega_4 + \omega_9(0.43)$                  |
| 178    | 15598.79   | 3137.17   | 0.00      | $\omega_3 + \omega_5 + \omega_8(0.7), \omega_1 + \omega_3 + \omega_{11}(0.5)$                 |
| 179    | 15600.41   | 3138.80   | 0.05      | $\omega_3 + \omega_6 + \omega_7(0.87), \omega_3 + \omega_5 + \omega_8(0.25)$                  |
| 180    | 15600.83   | 3139.22   | 0.00      | $2\omega_4 + \omega_5(0.88), \omega_4 + \omega_6 + \omega_7(0.17)$                            |
| 181    | 15609.05   | 3147.44   | 0.00      | $\omega_3 + \omega_6 + \omega_8(0.78), \omega_1 + \omega_3 + \omega_{10}(0.49)$               |
| 182    | 15615.83   | 3154.22   | 0.01      | $2\omega_4 + \omega_7(0.85), \omega_4 + \omega_5 + \omega_6(0.25)$                            |
| 183    | 15616.22   | 3154.61   | 0.00      | $\omega_3 + \omega_4 + \omega_9(0.69), \omega_3 + \omega_5 + \omega_7(0.5)$                   |
| 184    | 15617.40   | 3155.78   | 0.03      | $\omega_1 + \omega_3 + \omega_{11}(0.68), \omega_3 + \omega_5 + \omega_8(0.56)$               |
| 185    | 15622.38   | 3160.77   | 0.00      | $\omega_3 + 2\omega_7(0.71), \omega_2 + \omega_3 + \omega_{10}(0.57)$                         |
| 186    | 15622.91   | 3161.30   | 0.00      | $\omega_2 + \omega_3 + \omega_{10}(0.72), \omega_3 + 2\omega_7(0.56)$                         |
| 187    | 15625.31   | 3163.70   | 0.06      | $4\omega_1(0.77), 2\omega_1 + \omega_{11}(0.39)$                                              |
| 188    | 15626.30   | 3164.69   | 0.01      | $\omega_3 + \omega_7 + \omega_8(0.93), \omega_3 + \omega_7 + \omega_8 + \omega_9(0.2)$        |
| 189    | 15629.28   | 3167.67   | 0.00      | $\omega_3 + 2\omega_8(0.91), \omega_3 + 2\omega_7(0.23)$                                      |
| 190    | 15631.22   | 3169.61   | 0.00      | $\omega_1 + \omega_5 + \omega_9(0.84), \omega_3 + \omega_4 + \omega_9(0.23)$                  |
| 191    | 15634.74   | 3173.13   | 0.00      | $\omega_1 + \omega_6 + \omega_9(0.86), \omega_1 + \omega_6 + 2\omega_9(0.22)$                 |
| 192    | 15639.08   | 3177.47   | 0.00      | $2\omega_4 + \omega_8(0.94), 2\omega_4 + \omega_8 + \omega_9(0.17)$                           |
| 193    | 15642.90   | 3181.29   | 0.00      | $\omega_2 + \omega_3 + \omega_{11}(0.85), \omega_2 + \omega_3 + \omega_9 + \omega_{11}(0.18)$ |
| 194    | 15649.07   | 3187.46   | 0.00      | $3\omega_1 + \omega_2(0.84), \omega_1 + \omega_2 + \omega_{11}(0.24)$                         |
| 195    | 15652.68   | 3191.07   | 0.00      | $\omega_1 + \omega_8 + \omega_9(0.71), \omega_2 + \omega_6 + \omega_9(0.5)$                   |
| 196    | 15661.39   | 3199.78   | 0.00      | $\omega_2 + \omega_5 + \omega_9(0.75), \omega_1 + \omega_7 + \omega_9(0.47)$                  |
| 197    | 15662.05   | 3200.44   | 0.00      | $\omega_2 + \omega_6 + \omega_9(0.68), \omega_1 + \omega_8 + \omega_9(0.54)$                  |
| 198    | 15667.19   | 3205.58   | 0.00      | $\omega_1 + \omega_7 + \omega_9(0.76), \omega_2 + \omega_5 + \omega_9(0.46)$                  |
| 199    | 15676.29   | 3214.68   | 0.00      | $2\omega_1 + 2\omega_2(0.84), 2\omega_1 + \omega_{11}(0.2)$                                   |

**Table 2** Reference calculation for the PES + diagonal Coriolis operator with  $F = 200$  eigenvalues of  $C_2H_4O$ . The parameters are  $p = 8$ ,  $E_{max} = 25000\text{cm}^{-1}$  and  $\epsilon = 0.005$ .

| Number | Eigenvalue | Frequency | Intensity | Assignment                                                        |
|--------|------------|-----------|-----------|-------------------------------------------------------------------|
| 1      | 13258.09   | 794.93    | 0.12      | $\omega_1(0.97), \omega_1 + \omega_9(0.14)$                       |
| 2      | 13286.27   | 823.11    | 12.89     | $\omega_2(0.96), \omega_2 + \omega_9(0.16)$                       |
| 3      | 13342.46   | 879.29    | 79.08     | $\omega_3(0.97), \omega_3 + \omega_9(0.17)$                       |
| 4      | 13482.60   | 1019.44   | 0.00      | $\omega_4(0.97), \omega_4 + \omega_9(0.14)$                       |
| 5      | 13586.72   | 1123.56   | 0.79      | $\omega_6(0.96), \omega_6 + \omega_9(0.14)$                       |
| 6      | 13588.99   | 1125.82   | 0.05      | $\omega_5(0.97), \omega_5 + \omega_9(0.14)$                       |
| 7      | 13610.99   | 1147.82   | 3.81      | $\omega_7(0.97), \omega_7 + \omega_9(0.15)$                       |
| 8      | 13613.32   | 1150.16   | 0.00      | $\omega_8(0.97), \omega_8 + \omega_9(0.14)$                       |
| 9      | 13734.94   | 1271.77   | 15.41     | $\omega_9(0.94), 2\omega_9(0.22)$                                 |
| 10     | 13932.82   | 1469.66   | 0.11      | $\omega_{10}(0.97), \omega_9 + \omega_{10}(0.13)$                 |
| 11     | 13960.72   | 1497.56   | 3.82      | $\omega_{11}(0.94), 2\omega_1(0.19)$                              |
| 12     | 14055.47   | 1592.31   | 0.38      | $2\omega_1(0.94), \omega_{11}(0.18)$                              |
| 13     | 14078.23   | 1615.07   | 0.00      | $\omega_1 + \omega_2(0.96), \omega_1 + \omega_2 + \omega_9(0.16)$ |
| 14     | 14107.03   | 1643.87   | 0.44      | $2\omega_2(0.92), 2\omega_2 + \omega_9(0.18)$                     |
| 15     | 14137.31   | 1674.15   | 0.00      | $\omega_1 + \omega_3(0.96), \omega_1 + \omega_3 + \omega_9(0.18)$ |
| 16     | 14162.20   | 1699.03   | 0.34      | $\omega_2 + \omega_3(0.94), \omega_2 + \omega_3 + \omega_9(0.19)$ |
| 17     | 14220.38   | 1757.22   | 0.06      | $2\omega_3(0.94), 2\omega_3 + \omega_9(0.21)$                     |
| 18     | 14274.56   | 1811.40   | 0.10      | $\omega_1 + \omega_4(0.96), \omega_1 + \omega_4 + \omega_9(0.15)$ |
| 19     | 14299.09   | 1835.93   | 0.53      | $\omega_2 + \omega_4(0.94), \omega_2 + \omega_4 + \omega_9(0.17)$ |
| 20     | 14355.75   | 1892.59   | 0.10      | $\omega_3 + \omega_4(0.92), \omega_1 + \omega_5(0.25)$            |
| 21     | 14374.60   | 1911.43   | 1.38      | $\omega_1 + \omega_5(0.91), \omega_3 + \omega_4(0.26)$            |
| 22     | 14376.74   | 1913.58   | 0.48      | $\omega_1 + \omega_6(0.93), \omega_1 + \omega_6 + \omega_9(0.14)$ |
| 23     | 14394.94   | 1931.77   | 0.29      | $\omega_1 + \omega_8(0.8), \omega_2 + \omega_6(0.48)$             |
| 24     | 14404.86   | 1941.69   | 0.04      | $\omega_1 + \omega_7(0.83), \omega_2 + \omega_5(0.49)$            |
| 25     | 14406.12   | 1942.96   | 0.46      | $\omega_2 + \omega_6(0.79), \omega_1 + \omega_8(0.5)$             |
| 26     | 14410.13   | 1946.96   | 0.02      | $\omega_2 + \omega_5(0.82), \omega_1 + \omega_7(0.5)$             |
| 27     | 14427.83   | 1964.66   | 0.01      | $\omega_2 + \omega_7(0.94), \omega_2 + \omega_7 + \omega_9(0.17)$ |
| 28     | 14436.74   | 1973.58   | 0.01      | $\omega_2 + \omega_8(0.96), \omega_2 + \omega_8 + \omega_9(0.17)$ |
| 29     | 14463.47   | 2000.31   | 1.24      | $\omega_3 + \omega_6(0.95), \omega_3 + \omega_6 + \omega_9(0.18)$ |
| 30     | 14464.86   | 2001.69   | 0.17      | $\omega_3 + \omega_5(0.96), \omega_3 + \omega_5 + \omega_9(0.18)$ |
| 31     | 14486.90   | 2023.73   | 0.21      | $\omega_3 + \omega_7(0.96), \omega_3 + \omega_7 + \omega_9(0.19)$ |

Table 2 (continued)

| Number | Eigenvalue | Frequency | Intensity | Assignment                                                                             |
|--------|------------|-----------|-----------|----------------------------------------------------------------------------------------|
| 32     | 14489.89   | 2026.73   | 0.00      | $\omega_3 + \omega_8(0.96), \omega_3 + \omega_8 + \omega_9(0.18)$                      |
| 33     | 14498.80   | 2035.63   | 0.00      | $2\omega_4(0.96), 2\omega_4 + \omega_9(0.16)$                                          |
| 34     | 14526.52   | 2063.36   | 0.13      | $\omega_1 + \omega_9(0.93), \omega_1 + 2\omega_9(0.23)$                                |
| 35     | 14551.49   | 2088.32   | 0.07      | $\omega_2 + \omega_9(0.91), \omega_2 + 2\omega_9(0.25)$                                |
| 36     | 14594.68   | 2131.52   | 0.49      | $\omega_4 + \omega_6(0.92), \omega_4 + \omega_6 + \omega_9(0.15)$                      |
| 37     | 14600.89   | 2137.72   | 0.57      | $\omega_4 + \omega_5(0.93), \omega_4 + \omega_5 + \omega_9(0.15)$                      |
| 38     | 14605.51   | 2142.34   | 0.02      | $\omega_3 + \omega_9(0.9), \omega_3 + 2\omega_9(0.27)$                                 |
| 39     | 14618.77   | 2155.60   | 1.53      | $\omega_4 + \omega_7(0.92), \omega_5 + \omega_6(0.22)$                                 |
| 40     | 14631.79   | 2168.63   | 0.13      | $\omega_4 + \omega_8(0.96), \omega_4 + \omega_8 + \omega_9(0.15)$                      |
| 41     | 14699.68   | 2236.51   | 0.04      | $2\omega_6(0.83), 2\omega_5(0.42)$                                                     |
| 42     | 14706.96   | 2243.79   | 1.29      | $\omega_5 + \omega_6(0.91), \omega_4 + \omega_7(0.24)$                                 |
| 43     | 14713.33   | 2250.17   | 0.00      | $\omega_1 + \omega_{10}(0.82), \omega_6 + \omega_8(0.42)$                              |
| 44     | 14714.47   | 2251.31   | 0.03      | $2\omega_5(0.86), 2\omega_6(0.43)$                                                     |
| 45     | 14730.60   | 2267.43   | 0.07      | $\omega_5 + \omega_8(0.71), \omega_1 + \omega_{11}(0.54)$                              |
| 46     | 14733.06   | 2269.89   | 0.12      | $\omega_5 + \omega_7(0.84), \omega_4 + \omega_9(0.37)$                                 |
| 47     | 14733.25   | 2270.08   | 0.10      | $\omega_6 + \omega_7(0.91), \omega_5 + \omega_8(0.22)$                                 |
| 48     | 14740.87   | 2277.70   | 0.17      | $\omega_6 + \omega_8(0.85), \omega_1 + \omega_{10}(0.44)$                              |
| 49     | 14749.35   | 2286.18   | 0.05      | $\omega_1 + \omega_{11}(0.69), \omega_5 + \omega_8(0.61)$                              |
| 50     | 14754.39   | 2291.22   | 0.02      | $\omega_2 + \omega_{10}(0.9), 2\omega_7(0.31)$                                         |
| 51     | 14755.30   | 2292.13   | 0.00      | $\omega_4 + \omega_9(0.83), \omega_5 + \omega_7(0.42)$                                 |
| 52     | 14756.14   | 2292.97   | 0.07      | $2\omega_7(0.86), \omega_2 + \omega_{10}(0.31)$                                        |
| 53     | 14759.78   | 2296.62   | 0.14      | $\omega_7 + \omega_8(0.95), \omega_7 + \omega_8 + \omega_9(0.16)$                      |
| 54     | 14761.71   | 2298.55   | 0.02      | $2\omega_8(0.91), 2\omega_7(0.3)$                                                      |
| 55     | 14777.06   | 2313.90   | 0.54      | $\omega_2 + \omega_{11}(0.9), 3\omega_2(0.19)$                                         |
| 56     | 14811.63   | 2348.47   | 0.15      | $\omega_3 + \omega_{10}(0.96), \omega_3 + \omega_9 + \omega_{10}(0.17)$                |
| 57     | 14836.38   | 2373.22   | 0.02      | $\omega_3 + \omega_{11}(0.9), \omega_6 + \omega_9(0.18)$                               |
| 58     | 14848.85   | 2385.68   | 0.00      | $3\omega_1(0.88), \omega_1 + \omega_{11}(0.28)$                                        |
| 59     | 14854.28   | 2391.11   | 0.24      | $\omega_6 + \omega_9(0.9), \omega_6 + 2\omega_9(0.22)$                                 |
| 60     | 14855.75   | 2392.58   | 0.15      | $\omega_5 + \omega_9(0.92), \omega_5 + 2\omega_9(0.23)$                                |
| 61     | 14870.53   | 2407.36   | 0.00      | $2\omega_1 + \omega_2(0.92), 2\omega_1 + \omega_2 + \omega_9(0.16)$                    |
| 62     | 14880.02   | 2416.86   | 0.37      | $\omega_7 + \omega_9(0.92), \omega_7 + 2\omega_9(0.24)$                                |
| 63     | 14881.18   | 2418.01   | 0.00      | $\omega_8 + \omega_9(0.93), \omega_8 + 2\omega_9(0.23)$                                |
| 64     | 14895.87   | 2432.71   | 0.01      | $\omega_1 + 2\omega_2(0.9), \omega_1 + 2\omega_2 + \omega_9(0.18)$                     |
| 65     | 14924.72   | 2461.56   | 0.04      | $3\omega_2(0.85), \omega_2 + \omega_{11}(0.23)$                                        |
| 66     | 14933.23   | 2470.07   | 0.00      | $2\omega_1 + \omega_3(0.93), 2\omega_1 + \omega_3 + \omega_9(0.18)$                    |
| 67     | 14948.27   | 2485.10   | 0.07      | $\omega_4 + \omega_{10}(0.96), \omega_4 + \omega_9 + \omega_{10}(0.14)$                |
| 68     | 14952.97   | 2489.81   | 0.00      | $\omega_1 + \omega_2 + \omega_3(0.93), \omega_1 + \omega_2 + \omega_3 + \omega_9(0.2)$ |
| 69     | 14973.58   | 2510.42   | 0.00      | $\omega_4 + \omega_{11}(0.92), 2\omega_1 + \omega_4(0.19)$                             |
| 70     | 14979.20   | 2516.03   | 0.01      | $2\omega_2 + \omega_3(0.87), 2\omega_2 + \omega_3 + \omega_9(0.2)$                     |
| 71     | 15001.40   | 2538.23   | 0.00      | $2\omega_9(0.88), 3\omega_9(0.3)$                                                      |
| 72     | 15014.14   | 2550.97   | 0.00      | $\omega_1 + 2\omega_3(0.94), \omega_1 + 2\omega_3 + \omega_9(0.21)$                    |
| 73     | 15036.31   | 2573.15   | 0.00      | $\omega_2 + 2\omega_3(0.9), \omega_2 + 2\omega_3 + \omega_9(0.22)$                     |
| 74     | 15049.89   | 2586.72   | 0.36      | $\omega_6 + \omega_{10}(0.93), \omega_5 + \omega_{11}(0.22)$                           |
| 75     | 15054.56   | 2591.39   | 0.15      | $\omega_5 + \omega_{10}(0.92), \omega_6 + \omega_{11}(0.27)$                           |
| 76     | 15064.76   | 2601.59   | 0.01      | $2\omega_1 + \omega_4(0.88), \omega_7 + \omega_{10}(0.19)$                             |
| 77     | 15065.84   | 2602.67   | 0.00      | $\omega_7 + \omega_{10}(0.83), \omega_8 + \omega_{11}(0.38)$                           |
| 78     | 15067.95   | 2604.79   | 0.74      | $\omega_8 + \omega_{10}(0.86), \omega_7 + \omega_{11}(0.38)$                           |
| 79     | 15079.61   | 2616.44   | 0.02      | $\omega_6 + \omega_{11}(0.82), \omega_5 + \omega_{10}(0.29)$                           |
| 80     | 15082.26   | 2619.09   | 0.20      | $\omega_5 + \omega_{11}(0.89), \omega_6 + \omega_{10}(0.24)$                           |
| 81     | 15085.07   | 2621.91   | 0.01      | $\omega_1 + \omega_2 + \omega_4(0.86), \omega_6 + \omega_{11}(0.31)$                   |
| 82     | 15096.02   | 2632.86   | 0.00      | $3\omega_3(0.92), 3\omega_3 + \omega_9(0.24)$                                          |
| 83     | 15107.20   | 2644.03   | 0.00      | $\omega_8 + \omega_{11}(0.82), \omega_7 + \omega_{10}(0.42)$                           |
| 84     | 15107.48   | 2644.31   | 1.66      | $\omega_7 + \omega_{11}(0.84), \omega_8 + \omega_{10}(0.41)$                           |
| 85     | 15113.07   | 2649.91   | 0.01      | $2\omega_2 + \omega_4(0.87), 2\omega_2 + \omega_4 + \omega_9(0.18)$                    |
| 86     | 15144.24   | 2681.08   | 0.02      | $\omega_1 + \omega_3 + \omega_4(0.82), 2\omega_1 + \omega_5(0.41)$                     |
| 87     | 15160.81   | 2697.65   | 0.02      | $2\omega_1 + \omega_5(0.77), \omega_1 + \omega_3 + \omega_4(0.44)$                     |
| 88     | 15166.00   | 2702.83   | 0.00      | $2\omega_1 + \omega_6(0.86), \omega_1 + \omega_2 + \omega_4(0.22)$                     |
| 89     | 15168.55   | 2705.39   | 0.00      | $\omega_2 + \omega_3 + \omega_4(0.89), \omega_1 + \omega_2 + \omega_5(0.21)$           |
| 90     | 15178.65   | 2715.49   | 0.00      | $2\omega_1 + \omega_8(0.75), \omega_1 + \omega_2 + \omega_6(0.45)$                     |
| 91     | 15187.79   | 2724.62   | 0.09      | $\omega_1 + \omega_2 + \omega_5(0.85), 2\omega_1 + \omega_7(0.25)$                     |

Table 2 (continued)

| Number | Eigenvalue | Frequency | Intensity | Assignment                                                                              |
|--------|------------|-----------|-----------|-----------------------------------------------------------------------------------------|
| 92     | 15195.45   | 2732.29   | 0.00      | $\omega_1 + \omega_2 + \omega_6(0.76), 2\omega_1 + \omega_8(0.48)$                      |
| 93     | 15202.49   | 2739.32   | 0.02      | $\omega_9 + \omega_{10}(0.93), 2\omega_9 + \omega_{10}(0.22)$                           |
| 94     | 15202.74   | 2739.57   | 0.17      | $2\omega_1 + \omega_7(0.89), \omega_1 + \omega_2 + \omega_5(0.26)$                      |
| 95     | 15210.43   | 2747.27   | 0.04      | $\omega_1 + \omega_2 + \omega_8(0.63), 2\omega_2 + \omega_6(0.61)$                      |
| 96     | 15218.60   | 2755.43   | 0.02      | $\omega_1 + \omega_2 + \omega_7(0.85), 2\omega_2 + \omega_5(0.34)$                      |
| 97     | 15224.05   | 2760.89   | 0.02      | $\omega_1 + \omega_2 + \omega_8(0.67), 2\omega_2 + \omega_6(0.58)$                      |
| 98     | 15226.76   | 2763.59   | 0.01      | $2\omega_2 + \omega_5(0.84), \omega_1 + \omega_2 + \omega_7(0.37)$                      |
| 99     | 15227.35   | 2764.18   | 0.00      | $2\omega_3 + \omega_4(0.88), \omega_1 + \omega_3 + \omega_5(0.29)$                      |
| 100    | 15228.30   | 2765.13   | 0.11      | $\omega_9 + \omega_{11}(0.88), 2\omega_9 + \omega_{11}(0.22)$                           |
| 101    | 15241.82   | 2778.65   | 0.18      | $2\omega_2 + \omega_7(0.88), 2\omega_2 + \omega_7 + \omega_9(0.19)$                     |
| 102    | 15250.76   | 2787.59   | 0.00      | $\omega_1 + \omega_3 + \omega_5(0.88), 2\omega_3 + \omega_4(0.29)$                      |
| 103    | 15252.54   | 2789.37   | 0.00      | $\omega_1 + \omega_3 + \omega_6(0.91), \omega_1 + \omega_3 + \omega_6 + \omega_9(0.18)$ |
| 104    | 15256.93   | 2793.76   | 0.00      | $2\omega_2 + \omega_8(0.91), 2\omega_2 + \omega_8 + \omega_9(0.19)$                     |
| 105    | 15270.36   | 2807.20   | 0.00      | $\omega_1 + \omega_3 + \omega_8(0.74), \omega_2 + \omega_3 + \omega_6(0.53)$            |
| 106    | 15278.57   | 2815.40   | 0.00      | $\omega_2 + \omega_3 + \omega_5(0.71), \omega_1 + \omega_3 + \omega_7(0.6)$             |
| 107    | 15280.26   | 2817.09   | 0.00      | $\omega_2 + \omega_3 + \omega_6(0.72), \omega_1 + \omega_3 + \omega_8(0.56)$            |
| 108    | 15283.43   | 2820.26   | 0.00      | $\omega_1 + \omega_3 + \omega_7(0.73), \omega_2 + \omega_3 + \omega_5(0.59)$            |
| 109    | 15285.21   | 2822.05   | 0.00      | $\omega_1 + 2\omega_4(0.93), \omega_1 + 2\omega_4 + \omega_9(0.16)$                     |
| 110    | 15300.29   | 2837.12   | 0.00      | $\omega_2 + \omega_3 + \omega_7(0.91), \omega_2 + \omega_3 + \omega_7 + \omega_9(0.2)$  |
| 111    | 15307.84   | 2844.67   | 0.12      | $\omega_2 + 2\omega_4(0.91), \omega_2 + 2\omega_4 + \omega_9(0.17)$                     |
| 112    | 15309.50   | 2846.34   | 0.00      | $\omega_2 + \omega_3 + \omega_8(0.93), \omega_2 + \omega_3 + \omega_8 + \omega_9(0.2)$  |
| 113    | 15319.37   | 2856.21   | 0.04      | $2\omega_1 + \omega_9(0.88), 2\omega_1 + 2\omega_9(0.22)$                               |
| 114    | 15338.35   | 2875.18   | 0.01      | $2\omega_3 + \omega_6(0.92), 2\omega_3 + \omega_6 + \omega_9(0.21)$                     |
| 115    | 15338.89   | 2875.73   | 0.02      | $2\omega_3 + \omega_5(0.93), 2\omega_3 + \omega_5 + \omega_9(0.21)$                     |
| 116    | 15339.16   | 2876.00   | 0.00      | $\omega_1 + \omega_2 + \omega_9(0.89), \omega_1 + \omega_2 + 2\omega_9(0.26)$           |
| 117    | 15360.98   | 2897.82   | 0.02      | $2\omega_3 + \omega_7(0.93), 2\omega_3 + \omega_7 + \omega_9(0.22)$                     |
| 118    | 15364.53   | 2901.36   | 0.00      | $2\omega_3 + \omega_8(0.93), 2\omega_3 + \omega_8 + \omega_9(0.22)$                     |
| 119    | 15365.50   | 2902.34   | 0.00      | $\omega_3 + 2\omega_4(0.86), \omega_1 + \omega_4 + \omega_5(0.31)$                      |
| 120    | 15366.59   | 2903.42   | 0.13      | $2\omega_2 + \omega_9(0.82), 2\omega_2 + 2\omega_9(0.26)$                               |
| 121    | 15375.24   | 2912.08   | 21.94     | $\omega_{12}(0.68), \omega_{10} + \omega_{11}(0.56)$                                    |
| 122    | 15379.95   | 2916.79   | 4.22      | $\omega_1 + \omega_4 + \omega_5(0.51), 2\omega_{10}(0.49)$                              |
| 123    | 15382.12   | 2918.96   | 1.66      | $\omega_1 + \omega_4 + \omega_6(0.81), \omega_{10} + \omega_{11}(0.22)$                 |
| 124    | 15385.64   | 2922.48   | 2.23      | $\omega_1 + \omega_4 + \omega_5(0.6), 2\omega_{10}(0.52)$                               |
| 125    | 15396.52   | 2933.36   | 0.04      | $\omega_1 + \omega_3 + \omega_9(0.89), \omega_1 + \omega_3 + 2\omega_9(0.27)$           |
| 126    | 15401.03   | 2937.86   | 0.43      | $\omega_2 + \omega_4 + \omega_6(0.74), \omega_1 + \omega_4 + \omega_8(0.43)$            |
| 127    | 15407.00   | 2943.83   | 0.00      | $\omega_1 + \omega_4 + \omega_7(0.68), \omega_2 + \omega_4 + \omega_5(0.54)$            |
| 128    | 15414.11   | 2950.94   | 0.23      | $\omega_1 + \omega_4 + \omega_8(0.8), \omega_2 + \omega_4 + \omega_6(0.44)$             |
| 129    | 15416.06   | 2952.90   | 0.00      | $\omega_2 + \omega_4 + \omega_5(0.71), \omega_1 + \omega_4 + \omega_7(0.59)$            |
| 130    | 15419.81   | 2956.64   | 0.00      | $\omega_2 + \omega_3 + \omega_9(0.86), \omega_2 + \omega_3 + 2\omega_9(0.29)$           |
| 131    | 15420.74   | 2957.57   | 6.44      | $2\omega_{10}(0.61), \omega_{13}(0.52)$                                                 |
| 132    | 15432.07   | 2968.91   | 0.88      | $\omega_2 + \omega_4 + \omega_7(0.81), 2\omega_{11}(0.22)$                              |
| 133    | 15447.96   | 2984.79   | 0.06      | $\omega_2 + \omega_4 + \omega_8(0.92), \omega_2 + \omega_4 + \omega_8 + \omega_9(0.18)$ |
| 134    | 15458.43   | 2995.26   | 18.61     | $\omega_{10} + \omega_{11}(0.63), \omega_{12}(0.53)$                                    |
| 135    | 15462.97   | 2999.80   | 3.81      | $2\omega_{11}(0.72), \omega_{13}(0.38)$                                                 |
| 136    | 15465.41   | 3002.25   | 0.00      | $\omega_3 + \omega_4 + \omega_6(0.88), \omega_3 + \omega_4 + \omega_6 + \omega_9(0.18)$ |
| 137    | 15468.30   | 3005.14   | 0.31      | $\omega_3 + \omega_4 + \omega_5(0.71), \omega_1 + 2\omega_5(0.45)$                      |
| 138    | 15474.74   | 3011.57   | 0.06      | $2\omega_3 + \omega_9(0.85), 2\omega_3 + 2\omega_9(0.31)$                               |
| 139    | 15477.07   | 3013.90   | 0.01      | $\omega_3 + \omega_4 + \omega_5(0.55), \omega_1 + 2\omega_6(0.53)$                      |
| 140    | 15485.42   | 3022.25   | 0.01      | $\omega_1 + \omega_5 + \omega_6(0.82), \omega_1 + \omega_4 + \omega_7(0.23)$            |
| 141    | 15489.89   | 3026.73   | 0.24      | $\omega_3 + \omega_4 + \omega_7(0.88), \omega_3 + \omega_5 + \omega_6(0.2)$             |
| 142    | 15494.25   | 3031.08   | 0.03      | $\omega_{14}(0.85), \omega_{13} + \omega_{14}(0.2)$                                     |
| 143    | 15496.75   | 3033.58   | 2.81      | $\omega_1 + 2\omega_5(0.63), \omega_1 + 2\omega_6(0.62)$                                |
| 144    | 15500.46   | 3037.30   | 0.23      | $\omega_3 + \omega_4 + \omega_8(0.78), \omega_1 + \omega_5 + \omega_8(0.46)$            |
| 145    | 15500.83   | 3037.66   | 3.34      | $\omega_1 + \omega_6 + \omega_8(0.55), 2\omega_1 + \omega_{10}(0.54)$                   |
| 146    | 15506.08   | 3042.91   | 42.22     | $\omega_{15}(0.8), \omega_1 + 2\omega_8(0.24)$                                          |
| 147    | 15507.68   | 3044.51   | 0.04      | $\omega_2 + 2\omega_6(0.73), 2\omega_1 + \omega_{10}(0.38)$                             |
| 148    | 15508.57   | 3045.41   | 0.22      | $\omega_1 + \omega_5 + \omega_8(0.65), \omega_3 + \omega_4 + \omega_8(0.51)$            |
| 149    | 15509.57   | 3046.41   | 0.00      | $3\omega_4(0.93), 3\omega_4 + \omega_9(0.16)$                                           |
| 150    | 15516.71   | 3053.54   | 0.00      | $\omega_1 + \omega_5 + \omega_7(0.8), \omega_1 + \omega_4 + \omega_9(0.28)$             |
| 151    | 15517.94   | 3054.78   | 0.00      | $\omega_2 + \omega_5 + \omega_6(0.75), \omega_1 + \omega_6 + \omega_7(0.32)$            |



Table 2 (continued)

| Number | Eigenvalue | Frequency | Intensity | Assignment                                                                                   |
|--------|------------|-----------|-----------|----------------------------------------------------------------------------------------------|
| 152    | 15521.85   | 3058.69   | 0.00      | $\omega_1 + \omega_6 + \omega_7(0.85), \omega_2 + \omega_5 + \omega_6(0.24)$                 |
| 153    | 15526.98   | 3063.81   | 0.14      | $\omega_1 + \omega_6 + \omega_8(0.62), 2\omega_1 + \omega_{10}(0.52)$                        |
| 154    | 15530.31   | 3067.15   | 0.19      | $2\omega_1 + \omega_{11}(0.6), \omega_1 + \omega_5 + \omega_8(0.41)$                         |
| 155    | 15530.38   | 3067.22   | 0.00      | $\omega_2 + 2\omega_5(0.83), \omega_2 + 2\omega_6(0.34)$                                     |
| 156    | 15530.46   | 3067.29   | 3.18      | $\omega_1 + \omega_2 + \omega_{10}(0.69), \omega_2 + \omega_6 + \omega_8(0.45)$              |
| 157    | 15535.24   | 3072.08   | 0.00      | $\omega_1 + \omega_7 + \omega_8(0.63), \omega_2 + \omega_6 + \omega_7(0.62)$                 |
| 158    | 15535.85   | 3072.68   | 1.58      | $\omega_1 + 2\omega_8(0.77), \omega_1 + \omega_2 + \omega_{10}(0.35)$                        |
| 159    | 15542.03   | 3078.86   | 0.00      | $\omega_1 + \omega_4 + \omega_9(0.83), \omega_1 + \omega_5 + \omega_7(0.34)$                 |
| 160    | 15545.90   | 3082.73   | 0.00      | $\omega_1 + \omega_2 + \omega_{11}(0.56), \omega_2 + \omega_5 + \omega_8(0.52)$              |
| 161    | 15546.50   | 3083.33   | 1.76      | $\omega_2 + \omega_5 + \omega_7(0.69), \omega_1 + 2\omega_7(0.35)$                           |
| 162    | 15551.09   | 3087.93   | 0.00      | $\omega_1 + \omega_7 + \omega_8(0.63), \omega_2 + \omega_6 + \omega_7(0.47)$                 |
| 163    | 15551.86   | 3088.69   | 0.00      | $\omega_1 + 2\omega_7(0.87), \omega_2 + \omega_5 + \omega_7(0.23)$                           |
| 164    | 15559.31   | 3096.14   | 0.15      | $\omega_2 + \omega_6 + \omega_8(0.78), \omega_1 + \omega_2 + \omega_{10}(0.41)$              |
| 165    | 15565.69   | 3102.53   | 0.00      | $\omega_2 + \omega_5 + \omega_8(0.73), \omega_1 + \omega_2 + \omega_{11}(0.55)$              |
| 166    | 15566.71   | 3103.55   | 0.02      | $\omega_2 + 2\omega_7(0.9), \omega_1 + \omega_5 + \omega_7(0.18)$                            |
| 167    | 15566.74   | 3103.58   | 0.00      | $\omega_2 + \omega_4 + \omega_9(0.75), \omega_2 + \omega_5 + \omega_7(0.48)$                 |
| 168    | 15573.28   | 3110.11   | 0.00      | $\omega_3 + 2\omega_6(0.78), \omega_3 + 2\omega_5(0.45)$                                     |
| 169    | 15573.91   | 3110.74   | 0.12      | $2\omega_2 + \omega_{10}(0.9), 2\omega_2 + \omega_9 + \omega_{10}(0.17)$                     |
| 170    | 15576.47   | 3113.31   | 0.00      | $\omega_2 + \omega_7 + \omega_8(0.92), \omega_2 + \omega_7 + \omega_8 + \omega_9(0.18)$      |
| 171    | 15579.64   | 3116.47   | 0.00      | $\omega_3 + \omega_5 + \omega_6(0.88), \omega_3 + \omega_4 + \omega_7(0.23)$                 |
| 172    | 15584.71   | 3121.55   | 0.01      | $\omega_2 + 2\omega_8(0.93), \omega_2 + 2\omega_8 + \omega_9(0.18)$                          |
| 173    | 15586.89   | 3123.72   | 0.00      | $\omega_3 + 2\omega_5(0.82), \omega_3 + 2\omega_6(0.46)$                                     |
| 174    | 15590.40   | 3127.23   | 0.00      | $\omega_1 + \omega_3 + \omega_{10}(0.76), \omega_3 + \omega_6 + \omega_8(0.44)$              |
| 175    | 15592.40   | 3129.23   | 0.02      | $2\omega_2 + \omega_{11}(0.82), 4\omega_2(0.24)$                                             |
| 176    | 15597.51   | 3134.34   | 0.01      | $2\omega_4 + \omega_6(0.87), \omega_1 + \omega_4 + \omega_5(0.18)$                           |
| 177    | 15603.73   | 3140.56   | 0.00      | $\omega_3 + \omega_5 + \omega_7(0.74), \omega_3 + \omega_4 + \omega_9(0.44)$                 |
| 178    | 15604.97   | 3141.80   | 0.00      | $\omega_3 + \omega_5 + \omega_8(0.71), \omega_1 + \omega_3 + \omega_{11}(0.48)$              |
| 179    | 15606.59   | 3143.43   | 0.05      | $\omega_3 + \omega_6 + \omega_7(0.87), \omega_3 + \omega_5 + \omega_8(0.26)$                 |
| 180    | 15607.82   | 3144.66   | 0.00      | $2\omega_4 + \omega_5(0.88), \omega_4 + \omega_6 + \omega_7(0.17)$                           |
| 181    | 15615.39   | 3152.22   | 0.00      | $\omega_3 + \omega_6 + \omega_8(0.78), \omega_1 + \omega_3 + \omega_{10}(0.5)$               |
| 182    | 15621.62   | 3158.45   | 0.00      | $\omega_3 + \omega_4 + \omega_9(0.68), \omega_3 + \omega_5 + \omega_7(0.52)$                 |
| 183    | 15622.99   | 3159.83   | 0.01      | $2\omega_4 + \omega_7(0.82), \omega_4 + \omega_5 + \omega_6(0.24)$                           |
| 184    | 15623.98   | 3160.82   | 0.04      | $\omega_1 + \omega_3 + \omega_{11}(0.68), \omega_3 + \omega_5 + \omega_8(0.51)$              |
| 185    | 15628.36   | 3165.19   | 0.00      | $\omega_3 + 2\omega_7(0.89), \omega_3 + 2\omega_8(0.21)$                                     |
| 186    | 15629.70   | 3166.53   | 0.00      | $\omega_2 + \omega_3 + \omega_{10}(0.9), \omega_2 + \omega_3 + \omega_9 + \omega_{10}(0.19)$ |
| 187    | 15632.88   | 3169.71   | 0.01      | $\omega_3 + \omega_7 + \omega_8(0.93), \omega_3 + \omega_7 + \omega_8 + \omega_9(0.2)$       |
| 188    | 15635.06   | 3171.90   | 0.04      | $4\omega_1(0.65), \omega_3 + 2\omega_8(0.51)$                                                |
| 189    | 15635.24   | 3172.08   | 0.02      | $\omega_3 + 2\omega_8(0.76), 4\omega_1(0.43)$                                                |
| 190    | 15637.22   | 3174.05   | 0.00      | $\omega_1 + \omega_5 + \omega_9(0.85), \omega_3 + \omega_4 + \omega_9(0.22)$                 |
| 191    | 15640.94   | 3177.77   | 0.00      | $\omega_1 + \omega_6 + \omega_9(0.86), \omega_1 + \omega_6 + 2\omega_9(0.22)$                |
| 192    | 15646.03   | 3182.86   | 0.00      | $2\omega_4 + \omega_8(0.94), 2\omega_4 + \omega_8 + \omega_9(0.17)$                          |
| 193    | 15649.94   | 3186.77   | 0.00      | $\omega_2 + \omega_3 + \omega_{11}(0.85), \omega_2 + \omega_6 + \omega_9(0.19)$              |
| 194    | 15658.19   | 3195.03   | 0.00      | $3\omega_1 + \omega_2(0.85), \omega_1 + \omega_2 + \omega_{11}(0.23)$                        |
| 195    | 15658.69   | 3195.53   | 0.00      | $\omega_1 + \omega_8 + \omega_9(0.67), \omega_2 + \omega_6 + \omega_9(0.53)$                 |
| 196    | 15666.73   | 3203.57   | 0.00      | $\omega_2 + \omega_5 + \omega_9(0.77), \omega_1 + \omega_7 + \omega_9(0.42)$                 |
| 197    | 15667.76   | 3204.60   | 0.00      | $\omega_2 + \omega_6 + \omega_9(0.66), \omega_1 + \omega_8 + \omega_9(0.58)$                 |
| 198    | 15672.96   | 3209.80   | 0.00      | $\omega_1 + \omega_7 + \omega_9(0.79), \omega_2 + \omega_5 + \omega_9(0.42)$                 |
| 199    | 15684.63   | 3221.46   | 0.00      | $2\omega_1 + 2\omega_2(0.84), 2\omega_1 + \omega_{11}(0.2)$                                  |

**Table 3** Reference calculation for the PES + full Coriolis operator with  $F = 200$  eigenvalues of  $C_2H_4O$ . The parameters are  $p = 8$ ,  $E_{max} = 25000 \text{ cm}^{-1}$  and  $\epsilon = 0.005$ .

| Number | Eigenvalue | Frequency | Intensity | Assignment                                        |
|--------|------------|-----------|-----------|---------------------------------------------------|
| 1      | 13257.90   | 794.85    | 0.12      | $\omega_1(0.97), \omega_1 + \omega_9(0.14)$       |
| 2      | 13286.16   | 823.11    | 12.89     | $\omega_2(0.96), \omega_2 + \omega_9(0.16)$       |
| 3      | 13342.37   | 879.32    | 79.08     | $\omega_3(0.97), \omega_3 + \omega_9(0.17)$       |
| 4      | 13482.44   | 1019.39   | 0.00      | $\omega_4(0.97), \omega_4 + \omega_9(0.14)$       |
| 5      | 13586.57   | 1123.51   | 0.81      | $\omega_6(0.96), \omega_6 + \omega_9(0.14)$       |
| 6      | 13588.83   | 1125.78   | 0.04      | $\omega_5(0.97), \omega_5 + \omega_9(0.14)$       |
| 7      | 13610.82   | 1147.76   | 3.79      | $\omega_7(0.97), \omega_7 + \omega_9(0.15)$       |
| 8      | 13613.16   | 1150.10   | 0.02      | $\omega_8(0.97), \omega_8 + \omega_9(0.14)$       |
| 9      | 13734.79   | 1271.74   | 15.41     | $\omega_9(0.94), 2\omega_9(0.22)$                 |
| 10     | 13932.66   | 1469.61   | 0.11      | $\omega_{10}(0.97), \omega_9 + \omega_{10}(0.13)$ |

Table 3 (continued)

| Number | Eigenvalue | Frequency | Intensity | Assignment                                                                             |
|--------|------------|-----------|-----------|----------------------------------------------------------------------------------------|
| 11     | 13960.52   | 1497.47   | 3.80      | $\omega_{11}(0.94), 2\omega_1(0.19)$                                                   |
| 12     | 14055.18   | 1592.13   | 0.37      | $2\omega_1(0.94), \omega_{11}(0.18)$                                                   |
| 13     | 14078.05   | 1614.99   | 0.00      | $\omega_1 + \omega_2(0.96), \omega_1 + \omega_2 + \omega_9(0.16)$                      |
| 14     | 14106.89   | 1643.84   | 0.44      | $2\omega_2(0.92), 2\omega_2 + \omega_9(0.18)$                                          |
| 15     | 14137.15   | 1674.10   | 0.00      | $\omega_1 + \omega_3(0.96), \omega_1 + \omega_3 + \omega_9(0.18)$                      |
| 16     | 14162.08   | 1699.03   | 0.33      | $\omega_2 + \omega_3(0.94), \omega_2 + \omega_3 + \omega_9(0.19)$                      |
| 17     | 14220.40   | 1757.35   | 0.06      | $2\omega_3(0.94), 2\omega_3 + \omega_9(0.21)$                                          |
| 18     | 14274.30   | 1811.25   | 0.10      | $\omega_1 + \omega_4(0.96), \omega_1 + \omega_4 + \omega_9(0.15)$                      |
| 19     | 14298.90   | 1835.85   | 0.53      | $\omega_2 + \omega_4(0.94), \omega_2 + \omega_4 + \omega_9(0.17)$                      |
| 20     | 14355.57   | 1892.52   | 0.10      | $\omega_3 + \omega_4(0.92), \omega_1 + \omega_5(0.25)$                                 |
| 21     | 14374.30   | 1911.25   | 1.13      | $\omega_1 + \omega_5(0.9), \omega_3 + \omega_4(0.25)$                                  |
| 22     | 14376.52   | 1913.47   | 0.71      | $\omega_1 + \omega_6(0.92), \omega_1 + \omega_6 + \omega_9(0.14)$                      |
| 23     | 14394.93   | 1931.88   | 0.29      | $\omega_1 + \omega_8(0.8), \omega_2 + \omega_6(0.49)$                                  |
| 24     | 14404.56   | 1941.51   | 0.06      | $\omega_1 + \omega_7(0.83), \omega_2 + \omega_5(0.48)$                                 |
| 25     | 14405.92   | 1942.87   | 0.43      | $\omega_2 + \omega_6(0.79), \omega_1 + \omega_8(0.5)$                                  |
| 26     | 14409.94   | 1946.88   | 0.03      | $\omega_2 + \omega_5(0.82), \omega_1 + \omega_7(0.49)$                                 |
| 27     | 14427.72   | 1964.67   | 0.01      | $\omega_2 + \omega_7(0.94), \omega_2 + \omega_7 + \omega_9(0.17)$                      |
| 28     | 14436.47   | 1973.42   | 0.02      | $\omega_2 + \omega_8(0.95), \omega_2 + \omega_8 + \omega_9(0.17)$                      |
| 29     | 14463.31   | 2000.26   | 1.22      | $\omega_3 + \omega_6(0.94), \omega_3 + \omega_6 + \omega_9(0.18)$                      |
| 30     | 14464.71   | 2001.66   | 0.18      | $\omega_3 + \omega_5(0.95), \omega_3 + \omega_5 + \omega_9(0.18)$                      |
| 31     | 14486.81   | 2023.76   | 0.21      | $\omega_3 + \omega_7(0.95), \omega_3 + \omega_7 + \omega_9(0.19)$                      |
| 32     | 14489.70   | 2026.65   | 0.00      | $\omega_3 + \omega_8(0.96), \omega_3 + \omega_8 + \omega_9(0.18)$                      |
| 33     | 14498.60   | 2035.55   | 0.00      | $2\omega_4(0.96), 2\omega_4 + \omega_9(0.16)$                                          |
| 34     | 14526.27   | 2063.22   | 0.13      | $\omega_1 + \omega_9(0.93), \omega_1 + 2\omega_9(0.23)$                                |
| 35     | 14551.32   | 2088.27   | 0.07      | $\omega_2 + \omega_9(0.91), \omega_2 + 2\omega_9(0.25)$                                |
| 36     | 14594.46   | 2131.41   | 0.47      | $\omega_4 + \omega_6(0.92), \omega_4 + \omega_6 + \omega_9(0.15)$                      |
| 37     | 14600.69   | 2137.63   | 0.60      | $\omega_4 + \omega_5(0.93), \omega_4 + \omega_5 + \omega_9(0.15)$                      |
| 38     | 14605.32   | 2142.27   | 0.02      | $\omega_3 + \omega_9(0.9), \omega_3 + 2\omega_9(0.27)$                                 |
| 39     | 14618.25   | 2155.20   | 1.53      | $\omega_4 + \omega_7(0.92), \omega_5 + \omega_6(0.22)$                                 |
| 40     | 14631.59   | 2168.53   | 0.13      | $\omega_4 + \omega_8(0.96), \omega_4 + \omega_8 + \omega_9(0.15)$                      |
| 41     | 14699.47   | 2236.41   | 0.04      | $2\omega_6(0.83), 2\omega_5(0.42)$                                                     |
| 42     | 14706.90   | 2243.84   | 1.30      | $\omega_5 + \omega_6(0.91), \omega_4 + \omega_7(0.25)$                                 |
| 43     | 14712.89   | 2249.84   | 0.00      | $\omega_1 + \omega_{10}(0.82), \omega_6 + \omega_8(0.41)$                              |
| 44     | 14714.21   | 2251.16   | 0.03      | $2\omega_5(0.86), 2\omega_6(0.43)$                                                     |
| 45     | 14730.35   | 2267.30   | 0.06      | $\omega_5 + \omega_8(0.71), \omega_1 + \omega_{11}(0.55)$                              |
| 46     | 14732.68   | 2269.63   | 0.24      | $\omega_5 + \omega_7(0.64), \omega_6 + \omega_7(0.6)$                                  |
| 47     | 14733.17   | 2270.12   | 0.00      | $\omega_6 + \omega_7(0.69), \omega_5 + \omega_7(0.55)$                                 |
| 48     | 14740.60   | 2277.55   | 0.15      | $\omega_6 + \omega_8(0.85), \omega_1 + \omega_{10}(0.44)$                              |
| 49     | 14749.06   | 2286.01   | 0.06      | $\omega_1 + \omega_{11}(0.69), \omega_5 + \omega_8(0.61)$                              |
| 50     | 14754.18   | 2291.12   | 0.01      | $\omega_2 + \omega_{10}(0.89), 2\omega_7(0.33)$                                        |
| 51     | 14755.12   | 2292.07   | 0.00      | $\omega_4 + \omega_9(0.83), \omega_5 + \omega_7(0.42)$                                 |
| 52     | 14755.56   | 2292.51   | 0.08      | $2\omega_7(0.82), \omega_2 + \omega_{10}(0.34)$                                        |
| 53     | 14759.47   | 2296.42   | 0.14      | $\omega_7 + \omega_8(0.95), \omega_7 + \omega_8 + \omega_9(0.16)$                      |
| 54     | 14761.93   | 2298.88   | 0.01      | $2\omega_8(0.89), 2\omega_7(0.37)$                                                     |
| 55     | 14776.81   | 2313.76   | 0.55      | $\omega_2 + \omega_{11}(0.9), 3\omega_2(0.19)$                                         |
| 56     | 14811.48   | 2348.43   | 0.15      | $\omega_3 + \omega_{10}(0.96), \omega_3 + \omega_9 + \omega_{10}(0.17)$                |
| 57     | 14836.13   | 2373.08   | 0.02      | $\omega_3 + \omega_{11}(0.9), \omega_6 + \omega_9(0.18)$                               |
| 58     | 14848.44   | 2385.39   | 0.00      | $3\omega_1(0.88), \omega_1 + \omega_{11}(0.28)$                                        |
| 59     | 14854.07   | 2391.02   | 0.20      | $\omega_6 + \omega_9(0.89), \omega_6 + 2\omega_9(0.22)$                                |
| 60     | 14855.53   | 2392.48   | 0.19      | $\omega_5 + \omega_9(0.92), \omega_5 + 2\omega_9(0.23)$                                |
| 61     | 14870.21   | 2407.15   | 0.00      | $2\omega_1 + \omega_2(0.92), 2\omega_1 + \omega_2 + \omega_9(0.16)$                    |
| 62     | 14879.77   | 2416.72   | 0.36      | $\omega_7 + \omega_9(0.91), \omega_7 + 2\omega_9(0.24)$                                |
| 63     | 14880.93   | 2417.88   | 0.01      | $\omega_8 + \omega_9(0.92), \omega_8 + 2\omega_9(0.23)$                                |
| 64     | 14895.65   | 2432.60   | 0.01      | $\omega_1 + 2\omega_2(0.9), \omega_1 + 2\omega_2 + \omega_9(0.18)$                     |
| 65     | 14924.47   | 2461.41   | 0.04      | $3\omega_2(0.85), \omega_2 + \omega_{11}(0.24)$                                        |
| 66     | 14932.95   | 2469.90   | 0.00      | $2\omega_1 + \omega_3(0.93), 2\omega_1 + \omega_3 + \omega_9(0.18)$                    |
| 67     | 14948.04   | 2484.99   | 0.07      | $\omega_4 + \omega_{10}(0.96), \omega_4 + \omega_9 + \omega_{10}(0.14)$                |
| 68     | 14952.76   | 2489.71   | 0.00      | $\omega_1 + \omega_2 + \omega_3(0.93), \omega_1 + \omega_2 + \omega_3 + \omega_9(0.2)$ |
| 69     | 14973.24   | 2510.19   | 0.00      | $\omega_4 + \omega_{11}(0.92), 2\omega_1 + \omega_4(0.19)$                             |
| 70     | 14978.97   | 2515.92   | 0.01      | $2\omega_2 + \omega_3(0.86), 2\omega_2 + \omega_3 + \omega_9(0.2)$                     |

Table 3 (continued)

| Number | Eigenvalue | Frequency | Intensity | Assignment                                                                              |
|--------|------------|-----------|-----------|-----------------------------------------------------------------------------------------|
| 71     | 15001.19   | 2538.14   | 0.00      | $2\omega_9(0.88), 3\omega_9(0.3)$                                                       |
| 72     | 15014.07   | 2551.01   | 0.00      | $\omega_1 + 2\omega_3(0.94), \omega_1 + 2\omega_3 + \omega_9(0.21)$                     |
| 73     | 15036.43   | 2573.38   | 0.00      | $\omega_2 + 2\omega_3(0.9), \omega_2 + 2\omega_3 + \omega_9(0.22)$                      |
| 74     | 15050.07   | 2587.02   | 0.35      | $\omega_6 + \omega_{10}(0.93), \omega_5 + \omega_{11}(0.19)$                            |
| 75     | 15054.33   | 2591.27   | 0.16      | $\omega_5 + \omega_{10}(0.92), \omega_6 + \omega_{11}(0.27)$                            |
| 76     | 15064.28   | 2601.22   | 0.01      | $2\omega_1 + \omega_4(0.88), \omega_7 + \omega_{10}(0.21)$                              |
| 77     | 15065.65   | 2602.60   | 0.01      | $\omega_7 + \omega_{10}(0.82), \omega_8 + \omega_{11}(0.38)$                            |
| 78     | 15067.62   | 2604.57   | 0.74      | $\omega_8 + \omega_{10}(0.86), \omega_7 + \omega_{11}(0.38)$                            |
| 79     | 15079.32   | 2616.27   | 0.02      | $\omega_6 + \omega_{11}(0.82), \omega_5 + \omega_{10}(0.29)$                            |
| 80     | 15081.54   | 2618.48   | 0.22      | $\omega_5 + \omega_{11}(0.9), 2\omega_1 + \omega_5(0.21)$                               |
| 81     | 15084.74   | 2621.69   | 0.01      | $\omega_1 + \omega_2 + \omega_4(0.86), \omega_6 + \omega_{11}(0.31)$                    |
| 82     | 15096.19   | 2633.14   | 0.00      | $3\omega_3(0.92), 3\omega_3 + \omega_9(0.24)$                                           |
| 83     | 15106.78   | 2643.73   | 0.30      | $\omega_8 + \omega_{11}(0.75), \omega_7 + \omega_{10}(0.39)$                            |
| 84     | 15107.31   | 2644.26   | 1.34      | $\omega_7 + \omega_{11}(0.76), \omega_8 + \omega_{10}(0.37)$                            |
| 85     | 15112.77   | 2649.71   | 0.00      | $2\omega_2 + \omega_4(0.87), 2\omega_2 + \omega_4 + \omega_9(0.18)$                     |
| 86     | 15143.86   | 2680.81   | 0.02      | $\omega_1 + \omega_3 + \omega_4(0.82), 2\omega_1 + \omega_5(0.41)$                      |
| 87     | 15160.44   | 2697.38   | 0.02      | $2\omega_1 + \omega_5(0.77), \omega_1 + \omega_3 + \omega_4(0.45)$                      |
| 88     | 15165.60   | 2702.55   | 0.00      | $2\omega_1 + \omega_6(0.86), \omega_1 + \omega_2 + \omega_4(0.22)$                      |
| 89     | 15168.28   | 2705.23   | 0.00      | $\omega_2 + \omega_3 + \omega_4(0.88), \omega_1 + \omega_2 + \omega_5(0.21)$            |
| 90     | 15178.66   | 2715.61   | 0.00      | $2\omega_1 + \omega_8(0.74), \omega_1 + \omega_2 + \omega_6(0.46)$                      |
| 91     | 15187.45   | 2724.40   | 0.08      | $\omega_1 + \omega_2 + \omega_5(0.84), 2\omega_1 + \omega_7(0.25)$                      |
| 92     | 15195.14   | 2732.08   | 0.00      | $\omega_1 + \omega_2 + \omega_6(0.75), 2\omega_1 + \omega_8(0.48)$                      |
| 93     | 15202.26   | 2739.20   | 0.17      | $2\omega_1 + \omega_7(0.89), \omega_1 + \omega_2 + \omega_5(0.27)$                      |
| 94     | 15202.27   | 2739.22   | 0.02      | $\omega_9 + \omega_{10}(0.93), 2\omega_9 + \omega_{10}(0.22)$                           |
| 95     | 15210.37   | 2747.31   | 0.04      | $\omega_1 + \omega_2 + \omega_8(0.63), 2\omega_2 + \omega_6(0.61)$                      |
| 96     | 15218.31   | 2755.25   | 0.02      | $\omega_1 + \omega_2 + \omega_7(0.85), 2\omega_2 + \omega_5(0.34)$                      |
| 97     | 15223.78   | 2760.73   | 0.02      | $\omega_1 + \omega_2 + \omega_8(0.68), 2\omega_2 + \omega_6(0.58)$                      |
| 98     | 15226.55   | 2763.50   | 0.01      | $2\omega_2 + \omega_5(0.84), \omega_1 + \omega_2 + \omega_7(0.37)$                      |
| 99     | 15227.24   | 2764.18   | 0.00      | $2\omega_3 + \omega_4(0.88), \omega_1 + \omega_3 + \omega_5(0.29)$                      |
| 100    | 15228.04   | 2764.98   | 0.11      | $\omega_9 + \omega_{11}(0.88), 2\omega_9 + \omega_{11}(0.22)$                           |
| 101    | 15241.70   | 2778.65   | 0.18      | $2\omega_2 + \omega_7(0.88), 2\omega_2 + \omega_7 + \omega_9(0.19)$                     |
| 102    | 15250.41   | 2787.35   | 0.00      | $\omega_1 + \omega_3 + \omega_5(0.86), 2\omega_3 + \omega_4(0.28)$                      |
| 103    | 15252.32   | 2789.27   | 0.00      | $\omega_1 + \omega_3 + \omega_6(0.89), \omega_1 + \omega_3 + \omega_6 + \omega_9(0.17)$ |
| 104    | 15256.48   | 2793.43   | 0.00      | $2\omega_2 + \omega_8(0.91), 2\omega_2 + \omega_8 + \omega_9(0.19)$                     |
| 105    | 15270.24   | 2807.19   | 0.00      | $\omega_1 + \omega_3 + \omega_8(0.73), \omega_2 + \omega_3 + \omega_6(0.54)$            |
| 106    | 15278.35   | 2815.30   | 0.00      | $\omega_2 + \omega_3 + \omega_5(0.7), \omega_1 + \omega_3 + \omega_7(0.6)$              |
| 107    | 15280.05   | 2816.99   | 0.00      | $\omega_2 + \omega_3 + \omega_6(0.71), \omega_1 + \omega_3 + \omega_8(0.57)$            |
| 108    | 15283.18   | 2820.12   | 0.00      | $\omega_1 + \omega_3 + \omega_7(0.73), \omega_2 + \omega_3 + \omega_5(0.59)$            |
| 109    | 15285.00   | 2821.95   | 0.00      | $\omega_1 + 2\omega_4(0.93), \omega_1 + 2\omega_4 + \omega_9(0.16)$                     |
| 110    | 15300.36   | 2837.31   | 0.00      | $\omega_2 + \omega_3 + \omega_7(0.9), \omega_2 + \omega_3 + \omega_7 + \omega_9(0.2)$   |
| 111    | 15307.60   | 2844.55   | 0.12      | $\omega_2 + 2\omega_4(0.91), \omega_2 + 2\omega_4 + \omega_9(0.17)$                     |
| 112    | 15309.05   | 2845.99   | 0.00      | $\omega_2 + \omega_3 + \omega_8(0.93), \omega_2 + \omega_3 + \omega_8 + \omega_9(0.2)$  |
| 113    | 15318.97   | 2855.92   | 0.04      | $2\omega_1 + \omega_9(0.88), 2\omega_1 + 2\omega_9(0.22)$                               |
| 114    | 15338.22   | 2875.16   | 0.00      | $2\omega_3 + \omega_6(0.91), 2\omega_3 + \omega_6 + \omega_9(0.21)$                     |
| 115    | 15338.81   | 2875.76   | 0.02      | $2\omega_3 + \omega_5(0.92), 2\omega_3 + \omega_5 + \omega_9(0.21)$                     |
| 116    | 15338.85   | 2875.80   | 0.00      | $\omega_1 + \omega_2 + \omega_9(0.89), \omega_1 + \omega_2 + 2\omega_9(0.26)$           |
| 117    | 15361.02   | 2897.97   | 0.01      | $2\omega_3 + \omega_7(0.93), 2\omega_3 + \omega_7 + \omega_9(0.22)$                     |
| 118    | 15364.37   | 2901.32   | 0.00      | $2\omega_3 + \omega_8(0.93), 2\omega_3 + \omega_8 + \omega_9(0.22)$                     |
| 119    | 15365.27   | 2902.22   | 0.00      | $\omega_3 + 2\omega_4(0.86), \omega_1 + \omega_4 + \omega_5(0.31)$                      |
| 120    | 15366.46   | 2903.40   | 0.13      | $2\omega_2 + \omega_9(0.82), 2\omega_2 + 2\omega_9(0.26)$                               |
| 121    | 15375.17   | 2912.12   | 21.80     | $\omega_{12}(0.68), \omega_{10} + \omega_{11}(0.56)$                                    |
| 122    | 15379.70   | 2916.65   | 3.96      | $\omega_1 + \omega_4 + \omega_5(0.52), 2\omega_{10}(0.47)$                              |
| 123    | 15381.74   | 2918.68   | 2.07      | $\omega_1 + \omega_4 + \omega_6(0.79), \omega_{10} + \omega_{11}(0.23)$                 |
| 124    | 15385.52   | 2922.47   | 2.32      | $\omega_1 + \omega_4 + \omega_5(0.59), 2\omega_{10}(0.53)$                              |
| 125    | 15396.22   | 2933.17   | 0.04      | $\omega_1 + \omega_3 + \omega_9(0.89), \omega_1 + \omega_3 + 2\omega_9(0.27)$           |
| 126    | 15400.85   | 2937.80   | 0.44      | $\omega_2 + \omega_4 + \omega_6(0.75), \omega_1 + \omega_4 + \omega_8(0.42)$            |
| 127    | 15406.31   | 2943.26   | 0.00      | $\omega_1 + \omega_4 + \omega_7(0.7), \omega_2 + \omega_4 + \omega_5(0.51)$             |
| 128    | 15413.87   | 2950.81   | 0.22      | $\omega_1 + \omega_4 + \omega_8(0.8), \omega_2 + \omega_4 + \omega_6(0.43)$             |
| 129    | 15415.60   | 2952.54   | 0.00      | $\omega_2 + \omega_4 + \omega_5(0.72), \omega_1 + \omega_4 + \omega_7(0.56)$            |
| 130    | 15419.49   | 2956.44   | 0.01      | $\omega_2 + \omega_3 + \omega_9(0.86), \omega_2 + \omega_3 + 2\omega_9(0.29)$           |

Table 3 (continued)

| Number | Eigenvalue | Frequency | Intensity | Assignment                                                                                    |
|--------|------------|-----------|-----------|-----------------------------------------------------------------------------------------------|
| 131    | 15420.33   | 2957.27   | 6.48      | $2\omega_{10}(0.61), \omega_{13}(0.52)$                                                       |
| 132    | 15431.64   | 2968.59   | 0.89      | $\omega_2 + \omega_4 + \omega_7(0.81), \omega_{13}(0.22)$                                     |
| 133    | 15447.61   | 2984.56   | 0.05      | $\omega_2 + \omega_4 + \omega_8(0.92), \omega_2 + \omega_4 + \omega_8 + \omega_9(0.18)$       |
| 134    | 15457.86   | 2994.80   | 18.56     | $\omega_{10} + \omega_{11}(0.63), \omega_{12}(0.53)$                                          |
| 135    | 15462.42   | 2999.36   | 3.79      | $2\omega_{11}(0.72), \omega_{13}(0.38)$                                                       |
| 136    | 15465.11   | 3002.06   | 0.00      | $\omega_3 + \omega_4 + \omega_6(0.88), \omega_3 + \omega_4 + \omega_6 + \omega_9(0.18)$       |
| 137    | 15467.96   | 3004.91   | 0.31      | $\omega_3 + \omega_4 + \omega_5(0.7), \omega_1 + 2\omega_5(0.46)$                             |
| 138    | 15474.58   | 3011.52   | 0.06      | $2\omega_3 + \omega_9(0.85), 2\omega_3 + 2\omega_9(0.31)$                                     |
| 139    | 15476.79   | 3013.73   | 0.01      | $\omega_3 + \omega_4 + \omega_5(0.55), \omega_1 + 2\omega_6(0.52)$                            |
| 140    | 15485.19   | 3022.14   | 0.01      | $\omega_1 + \omega_5 + \omega_6(0.82), \omega_1 + \omega_4 + \omega_7(0.23)$                  |
| 141    | 15489.38   | 3026.33   | 0.28      | $\omega_3 + \omega_4 + \omega_7(0.88), \omega_3 + \omega_5 + \omega_6(0.2)$                   |
| 142    | 15494.06   | 3031.00   | 0.02      | $\omega_{14}(0.85), \omega_{13} + \omega_{14}(0.2)$                                           |
| 143    | 15496.33   | 3033.27   | 2.73      | $\omega_1 + 2\omega_5(0.63), \omega_1 + 2\omega_6(0.62)$                                      |
| 144    | 15499.89   | 3036.84   | 1.48      | $\omega_3 + \omega_4 + \omega_8(0.6), \omega_1 + \omega_5 + \omega_8(0.37)$                   |
| 145    | 15500.64   | 3037.58   | 2.07      | $\omega_3 + \omega_4 + \omega_8(0.5), 2\omega_1 + \omega_{10}(0.43)$                          |
| 146    | 15505.88   | 3042.82   | 42.42     | $\omega_{15}(0.81), \omega_1 + 2\omega_8(0.24)$                                               |
| 147    | 15507.34   | 3044.28   | 0.03      | $\omega_2 + 2\omega_6(0.71), 2\omega_1 + \omega_{10}(0.35)$                                   |
| 148    | 15508.45   | 3045.39   | 0.21      | $\omega_1 + \omega_5 + \omega_8(0.63), \omega_3 + \omega_4 + \omega_8(0.49)$                  |
| 149    | 15509.31   | 3046.26   | 0.01      | $3\omega_4(0.93), 3\omega_4 + \omega_9(0.16)$                                                 |
| 150    | 15516.22   | 3053.17   | 0.00      | $\omega_1 + \omega_5 + \omega_7(0.79), \omega_1 + \omega_4 + \omega_9(0.27)$                  |
| 151    | 15517.77   | 3054.72   | 0.00      | $\omega_2 + \omega_5 + \omega_6(0.74), \omega_1 + \omega_6 + \omega_7(0.35)$                  |
| 152    | 15521.52   | 3058.47   | 0.00      | $\omega_1 + \omega_6 + \omega_7(0.84), \omega_2 + \omega_5 + \omega_6(0.26)$                  |
| 153    | 15526.61   | 3063.56   | 0.13      | $\omega_1 + \omega_6 + \omega_8(0.62), 2\omega_1 + \omega_{10}(0.51)$                         |
| 154    | 15529.89   | 3066.83   | 0.16      | $2\omega_1 + \omega_{11}(0.57), \omega_1 + \omega_5 + \omega_8(0.4)$                          |
| 155    | 15530.07   | 3067.01   | 2.93      | $\omega_1 + \omega_2 + \omega_{10}(0.71), \omega_2 + \omega_6 + \omega_8(0.44)$               |
| 156    | 15530.09   | 3067.04   | 0.02      | $\omega_2 + 2\omega_5(0.8), \omega_2 + 2\omega_6(0.33)$                                       |
| 157    | 15535.06   | 3072.01   | 0.00      | $\omega_1 + \omega_7 + \omega_8(0.63), \omega_2 + \omega_6 + \omega_7(0.61)$                  |
| 158    | 15535.65   | 3072.60   | 1.82      | $\omega_1 + 2\omega_8(0.78), \omega_1 + \omega_2 + \omega_{10}(0.31)$                         |
| 159    | 15541.80   | 3078.75   | 0.00      | $\omega_1 + \omega_4 + \omega_9(0.83), \omega_1 + \omega_5 + \omega_7(0.34)$                  |
| 160    | 15545.36   | 3082.30   | 0.10      | $\omega_1 + \omega_2 + \omega_{11}(0.54), \omega_2 + \omega_5 + \omega_8(0.5)$                |
| 161    | 15546.29   | 3083.23   | 1.58      | $\omega_2 + \omega_5 + \omega_7(0.67), \omega_1 + 2\omega_7(0.36)$                            |
| 162    | 15550.81   | 3087.76   | 0.00      | $\omega_1 + \omega_7 + \omega_8(0.63), \omega_2 + \omega_6 + \omega_7(0.47)$                  |
| 163    | 15551.70   | 3088.64   | 0.00      | $\omega_1 + 2\omega_7(0.85), \omega_2 + \omega_5 + \omega_7(0.24)$                            |
| 164    | 15558.96   | 3095.91   | 0.16      | $\omega_2 + \omega_6 + \omega_8(0.78), \omega_1 + \omega_2 + \omega_{10}(0.4)$                |
| 165    | 15565.30   | 3102.25   | 0.00      | $\omega_2 + \omega_5 + \omega_8(0.73), \omega_1 + \omega_2 + \omega_{11}(0.54)$               |
| 166    | 15566.46   | 3103.41   | 0.02      | $\omega_2 + 2\omega_7(0.89), \omega_1 + \omega_5 + \omega_7(0.18)$                            |
| 167    | 15566.47   | 3103.42   | 0.00      | $\omega_2 + \omega_4 + \omega_9(0.75), \omega_2 + \omega_5 + \omega_7(0.48)$                  |
| 168    | 15573.01   | 3109.96   | 0.00      | $\omega_3 + 2\omega_6(0.78), \omega_3 + 2\omega_5(0.45)$                                      |
| 169    | 15573.58   | 3110.53   | 0.12      | $2\omega_2 + \omega_{10}(0.9), 2\omega_2 + \omega_9 + \omega_{10}(0.17)$                      |
| 170    | 15576.04   | 3112.99   | 0.00      | $\omega_2 + \omega_7 + \omega_8(0.91), \omega_2 + \omega_7 + \omega_8 + \omega_9(0.18)$       |
| 171    | 15579.57   | 3116.52   | 0.00      | $\omega_3 + \omega_5 + \omega_6(0.87), \omega_3 + \omega_4 + \omega_7(0.23)$                  |
| 172    | 15584.45   | 3121.40   | 0.01      | $\omega_2 + 2\omega_8(0.93), \omega_2 + 2\omega_8 + \omega_9(0.18)$                           |
| 173    | 15586.61   | 3123.56   | 0.00      | $\omega_3 + 2\omega_5(0.82), \omega_3 + 2\omega_6(0.46)$                                      |
| 174    | 15589.87   | 3126.82   | 0.00      | $\omega_1 + \omega_3 + \omega_{10}(0.75), \omega_3 + \omega_6 + \omega_8(0.43)$               |
| 175    | 15592.12   | 3129.07   | 0.02      | $2\omega_2 + \omega_{11}(0.82), 4\omega_2(0.24)$                                              |
| 176    | 15597.12   | 3134.06   | 0.01      | $2\omega_4 + \omega_6(0.87), \omega_1 + \omega_4 + \omega_5(0.18)$                            |
| 177    | 15603.55   | 3140.49   | 0.00      | $\omega_3 + \omega_5 + \omega_7(0.74), \omega_3 + \omega_4 + \omega_9(0.43)$                  |
| 178    | 15604.65   | 3141.60   | 0.00      | $\omega_3 + \omega_5 + \omega_8(0.72), \omega_1 + \omega_3 + \omega_{11}(0.49)$               |
| 179    | 15606.36   | 3143.30   | 0.05      | $\omega_3 + \omega_6 + \omega_7(0.88), \omega_3 + \omega_5 + \omega_8(0.24)$                  |
| 180    | 15607.44   | 3144.39   | 0.00      | $2\omega_4 + \omega_5(0.88), \omega_4 + \omega_6 + \omega_7(0.17)$                            |
| 181    | 15615.12   | 3152.07   | 0.00      | $\omega_3 + \omega_6 + \omega_8(0.78), \omega_1 + \omega_3 + \omega_{10}(0.5)$                |
| 182    | 15621.35   | 3158.30   | 0.00      | $\omega_3 + \omega_4 + \omega_9(0.68), \omega_3 + \omega_5 + \omega_7(0.52)$                  |
| 183    | 15622.09   | 3159.04   | 0.01      | $2\omega_4 + \omega_7(0.83), \omega_4 + \omega_5 + \omega_6(0.25)$                            |
| 184    | 15623.64   | 3160.59   | 0.04      | $\omega_1 + \omega_3 + \omega_{11}(0.69), \omega_3 + \omega_5 + \omega_8(0.53)$               |
| 185    | 15627.97   | 3164.92   | 0.00      | $\omega_3 + 2\omega_7(0.88), \omega_3 + 2\omega_8(0.29)$                                      |
| 186    | 15629.44   | 3166.38   | 0.00      | $\omega_2 + \omega_3 + \omega_{10}(0.92), \omega_2 + \omega_3 + \omega_9 + \omega_{10}(0.19)$ |
| 187    | 15632.63   | 3169.58   | 0.01      | $\omega_3 + \omega_7 + \omega_8(0.93), \omega_3 + \omega_7 + \omega_8 + \omega_9(0.2)$        |
| 188    | 15634.61   | 3171.56   | 0.05      | $4\omega_1(0.77), 2\omega_1 + \omega_{11}(0.37)$                                              |
| 189    | 15635.30   | 3172.24   | 0.00      | $\omega_3 + 2\omega_8(0.88), \omega_3 + 2\omega_7(0.3)$                                       |
| 190    | 15636.81   | 3173.76   | 0.00      | $\omega_1 + \omega_5 + \omega_9(0.84), \omega_3 + \omega_4 + \omega_9(0.22)$                  |

Table 3 (continued)

| Number | Eigenvalue | Frequency | Intensity | Assignment                                                                                    |
|--------|------------|-----------|-----------|-----------------------------------------------------------------------------------------------|
| 191    | 15640.60   | 3177.55   | 0.00      | $\omega_1 + \omega_6 + \omega_9(0.86), \omega_1 + \omega_6 + 2\omega_9(0.22)$                 |
| 192    | 15645.77   | 3182.72   | 0.00      | $2\omega_4 + \omega_8(0.94), 2\omega_4 + \omega_8 + \omega_9(0.17)$                           |
| 193    | 15649.47   | 3186.42   | 0.00      | $\omega_2 + \omega_3 + \omega_{11}(0.85), \omega_2 + \omega_3 + \omega_9 + \omega_{11}(0.18)$ |
| 194    | 15657.69   | 3194.64   | 0.00      | $3\omega_1 + \omega_2(0.85), \omega_1 + \omega_2 + \omega_{11}(0.23)$                         |
| 195    | 15658.55   | 3195.50   | 0.00      | $\omega_1 + \omega_8 + \omega_9(0.67), \omega_2 + \omega_6 + \omega_9(0.53)$                  |
| 196    | 15666.36   | 3203.31   | 0.00      | $\omega_2 + \omega_5 + \omega_9(0.76), \omega_1 + \omega_7 + \omega_9(0.43)$                  |
| 197    | 15667.45   | 3204.40   | 0.00      | $\omega_2 + \omega_6 + \omega_9(0.65), \omega_1 + \omega_8 + \omega_9(0.58)$                  |
| 198    | 15672.60   | 3209.54   | 0.00      | $\omega_1 + \omega_7 + \omega_9(0.79), \omega_2 + \omega_5 + \omega_9(0.43)$                  |
| 199    | 15684.27   | 3221.21   | 0.00      | $2\omega_1 + 2\omega_2(0.84), 2\omega_1 + \omega_{11}(0.2)$                                   |

**Table 4** Intensity selection calculation for the PES + diagonal Coriolis operator with  $F = 200$  eigenvalues of  $C_2H_4O$ . The parameters are  $p = 8$ ,  $E_{max} = 25000\text{cm}^{-1}$ ,  $\epsilon = 0.005$  and  $\epsilon_f = 0.01\text{ km/mol}$ .

| Number | Eigenvalue | Frequency | Intensity | Assignment                                                        |
|--------|------------|-----------|-----------|-------------------------------------------------------------------|
| 1(1)   | 13257.91   | 794.87    | 0.12      | $\omega_1(0.97), \omega_1 + \omega_9(0.14)$                       |
| 2(2)   | 13286.12   | 823.08    | 12.89     | $\omega_2(0.96), \omega_2 + \omega_9(0.16)$                       |
| 3(3)   | 13342.32   | 879.28    | 79.08     | $\omega_3(0.97), \omega_3 + \omega_9(0.17)$                       |
| 4(5)   | 13586.04   | 1122.99   | 0.79      | $\omega_6(0.96), \omega_6 + \omega_9(0.14)$                       |
| 5(6)   | 13588.30   | 1125.25   | 0.05      | $\omega_5(0.97), \omega_5 + \omega_9(0.14)$                       |
| 6(7)   | 13610.32   | 1147.28   | 3.81      | $\omega_7(0.97), \omega_7 + \omega_9(0.15)$                       |
| 7(9)   | 13734.34   | 1271.30   | 15.41     | $\omega_9(0.94), 2\omega_9(0.22)$                                 |
| 8(10)  | 13932.07   | 1469.03   | 0.11      | $\omega_{10}(0.97), \omega_9 + \omega_{10}(0.13)$                 |
| 9(11)  | 13959.96   | 1496.92   | 3.82      | $\omega_{11}(0.94), 2\omega_1(0.19)$                              |
| 10(12) | 14054.52   | 1591.48   | 0.38      | $2\omega_1(0.94), \omega_{11}(0.18)$                              |
| 11(14) | 14106.35   | 1643.30   | 0.44      | $2\omega_2(0.92), 2\omega_2 + \omega_9(0.18)$                     |
| 12(16) | 14161.54   | 1698.50   | 0.34      | $\omega_2 + \omega_3(0.94), \omega_2 + \omega_3 + \omega_9(0.19)$ |
| 13(17) | 14219.73   | 1756.69   | 0.06      | $2\omega_3(0.94), 2\omega_3 + \omega_9(0.21)$                     |
| 14(18) | 14273.54   | 1810.50   | 0.10      | $\omega_1 + \omega_4(0.96), \omega_1 + \omega_4 + \omega_9(0.15)$ |
| 15(19) | 14298.23   | 1835.19   | 0.53      | $\omega_2 + \omega_4(0.94), \omega_2 + \omega_4 + \omega_9(0.17)$ |
| 16(20) | 14355.09   | 1892.05   | 0.10      | $\omega_3 + \omega_4(0.92), \omega_1 + \omega_5(0.26)$            |
| 17(21) | 14373.68   | 1910.63   | 1.37      | $\omega_1 + \omega_5(0.91), \omega_3 + \omega_4(0.26)$            |
| 18(22) | 14375.64   | 1912.59   | 0.48      | $\omega_1 + \omega_6(0.93), \omega_1 + \omega_6 + \omega_9(0.14)$ |
| 19(23) | 14393.91   | 1930.86   | 0.29      | $\omega_1 + \omega_8(0.81), \omega_2 + \omega_6(0.48)$            |
| 20(24) | 14403.92   | 1940.88   | 0.04      | $\omega_1 + \omega_7(0.83), \omega_2 + \omega_5(0.48)$            |
| 21(25) | 14405.23   | 1942.18   | 0.46      | $\omega_2 + \omega_6(0.8), \omega_1 + \omega_8(0.5)$              |
| 22(26) | 14409.26   | 1946.22   | 0.02      | $\omega_2 + \omega_5(0.82), \omega_1 + \omega_7(0.49)$            |
| 23(28) | 14435.91   | 1972.87   | 0.01      | $\omega_2 + \omega_8(0.96), \omega_2 + \omega_8 + \omega_9(0.17)$ |
| 24(29) | 14462.67   | 1999.62   | 1.24      | $\omega_3 + \omega_6(0.95), \omega_3 + \omega_6 + \omega_9(0.18)$ |
| 25(30) | 14464.03   | 2000.99   | 0.17      | $\omega_3 + \omega_5(0.96), \omega_3 + \omega_5 + \omega_9(0.18)$ |
| 26(31) | 14486.10   | 2023.06   | 0.21      | $\omega_3 + \omega_7(0.96), \omega_3 + \omega_7 + \omega_9(0.19)$ |
| 27(34) | 14525.66   | 2062.62   | 0.13      | $\omega_1 + \omega_9(0.93), \omega_1 + 2\omega_9(0.23)$           |
| 28(35) | 14550.78   | 2087.73   | 0.07      | $\omega_2 + \omega_9(0.91), \omega_2 + 2\omega_9(0.25)$           |
| 29(36) | 14593.75   | 2130.71   | 0.49      | $\omega_4 + \omega_6(0.92), \omega_4 + \omega_6 + \omega_9(0.15)$ |
| 30(37) | 14599.77   | 2136.73   | 0.57      | $\omega_4 + \omega_5(0.93), \omega_4 + \omega_5 + \omega_9(0.15)$ |
| 31(38) | 14604.82   | 2141.78   | 0.02      | $\omega_3 + \omega_9(0.9), \omega_3 + 2\omega_9(0.27)$            |
| 32(39) | 14617.70   | 2154.66   | 1.53      | $\omega_4 + \omega_7(0.92), \omega_5 + \omega_6(0.22)$            |
| 33(40) | 14630.81   | 2167.77   | 0.13      | $\omega_4 + \omega_8(0.96), \omega_4 + \omega_8 + \omega_9(0.15)$ |
| 34(41) | 14698.62   | 2235.57   | 0.04      | $2\omega_6(0.83), 2\omega_5(0.42)$                                |
| 35(42) | 14705.88   | 2242.84   | 1.28      | $\omega_5 + \omega_6(0.91), \omega_4 + \omega_7(0.24)$            |
| 36(44) | 14713.48   | 2250.44   | 0.03      | $2\omega_5(0.86), 2\omega_6(0.43)$                                |
| 37(45) | 14729.49   | 2266.45   | 0.07      | $\omega_5 + \omega_8(0.71), \omega_1 + \omega_{11}(0.55)$         |
| 38(46) | 14732.25   | 2269.21   | 0.10      | $\omega_6 + \omega_7(0.91), \omega_5 + \omega_8(0.21)$            |
| 39(47) | 14732.27   | 2269.22   | 0.12      | $\omega_5 + \omega_7(0.85), \omega_4 + \omega_9(0.37)$            |
| 40(48) | 14740.11   | 2277.07   | 0.17      | $\omega_6 + \omega_8(0.85), \omega_1 + \omega_{10}(0.44)$         |
| 41(49) | 14748.26   | 2285.22   | 0.05      | $\omega_1 + \omega_{11}(0.68), \omega_5 + \omega_8(0.62)$         |
| 42(50) | 14753.51   | 2290.47   | 0.01      | $\omega_2 + \omega_{10}(0.9), 2\omega_7(0.31)$                    |
| 43(52) | 14755.22   | 2292.17   | 0.07      | $2\omega_7(0.85), \omega_2 + \omega_{10}(0.32)$                   |
| 44(53) | 14758.82   | 2295.77   | 0.14      | $\omega_7 + \omega_8(0.95), \omega_7 + \omega_8 + \omega_9(0.16)$ |
| 45(54) | 14760.78   | 2297.73   | 0.02      | $2\omega_8(0.91), 2\omega_7(0.3)$                                 |

Table 4 (continued)

| Number   | Eigenvalue | Frequency | Intensity | Assignment                                                                              |
|----------|------------|-----------|-----------|-----------------------------------------------------------------------------------------|
| 46(55)   | 14776.18   | 2313.13   | 0.54      | $\omega_2 + \omega_{11}(0.9), 3\omega_2(0.19)$                                          |
| 47(56)   | 14810.78   | 2347.73   | 0.15      | $\omega_3 + \omega_{10}(0.96), \omega_3 + \omega_9 + \omega_{10}(0.17)$                 |
| 48(57)   | 14835.54   | 2372.50   | 0.02      | $\omega_3 + \omega_{11}(0.9), \omega_6 + \omega_9(0.18)$                                |
| 49(59)   | 14853.41   | 2390.37   | 0.24      | $\omega_6 + \omega_9(0.9), \omega_6 + 2\omega_9(0.22)$                                  |
| 50(60)   | 14854.85   | 2391.81   | 0.15      | $\omega_5 + \omega_9(0.92), \omega_5 + 2\omega_9(0.23)$                                 |
| 51(62)   | 14879.16   | 2416.12   | 0.37      | $\omega_7 + \omega_9(0.92), \omega_7 + 2\omega_9(0.24)$                                 |
| 52(64)   | 14894.83   | 2431.78   | 0.01      | $\omega_1 + 2\omega_2(0.9), \omega_1 + 2\omega_2 + \omega_9(0.18)$                      |
| 53(65)   | 14923.89   | 2460.85   | 0.04      | $3\omega_2(0.85), \omega_2 + \omega_{11}(0.23)$                                         |
| 54(67)   | 14947.17   | 2484.13   | 0.07      | $\omega_4 + \omega_{10}(0.96), \omega_4 + \omega_9 + \omega_{10}(0.14)$                 |
| 55(74)   | 15048.77   | 2585.73   | 0.36      | $\omega_6 + \omega_{10}(0.93), \omega_5 + \omega_{11}(0.22)$                            |
| 56(75)   | 15053.44   | 2590.40   | 0.15      | $\omega_5 + \omega_{10}(0.92), \omega_6 + \omega_{11}(0.27)$                            |
| 57(78)   | 15066.79   | 2603.75   | 0.75      | $\omega_8 + \omega_{10}(0.86), \omega_7 + \omega_{11}(0.38)$                            |
| 58(79)   | 15078.44   | 2615.39   | 0.02      | $\omega_6 + \omega_{11}(0.81), \omega_1 + \omega_2 + \omega_4(0.31)$                    |
| 59(80)   | 15081.13   | 2618.09   | 0.20      | $\omega_5 + \omega_{11}(0.89), \omega_6 + \omega_{10}(0.24)$                            |
| 60(81)   | 15083.74   | 2620.69   | 0.01      | $\omega_1 + \omega_2 + \omega_4(0.85), \omega_6 + \omega_{11}(0.33)$                    |
| 61(83)   | 15106.43   | 2643.39   | 1.66      | $\omega_7 + \omega_{11}(0.84), \omega_8 + \omega_{10}(0.41)$                            |
| 62(86)   | 15142.79   | 2679.75   | 0.02      | $\omega_1 + \omega_3 + \omega_4(0.82), 2\omega_1 + \omega_5(0.42)$                      |
| 63(87)   | 15159.16   | 2696.12   | 0.02      | $2\omega_1 + \omega_5(0.76), \omega_1 + \omega_3 + \omega_4(0.46)$                      |
| 64(91)   | 15186.35   | 2723.31   | 0.09      | $\omega_1 + \omega_2 + \omega_5(0.84), 2\omega_1 + \omega_7(0.25)$                      |
| 65(93)   | 15201.37   | 2738.33   | 0.17      | $2\omega_1 + \omega_7(0.89), \omega_1 + \omega_2 + \omega_5(0.26)$                      |
| 66(94)   | 15201.56   | 2738.52   | 0.02      | $\omega_9 + \omega_{10}(0.93), 2\omega_9 + \omega_{10}(0.22)$                           |
| 67(95)   | 15209.21   | 2746.17   | 0.04      | $\omega_1 + \omega_2 + \omega_8(0.64), 2\omega_2 + \omega_6(0.6)$                       |
| 68(96)   | 15217.42   | 2754.38   | 0.02      | $\omega_1 + \omega_2 + \omega_7(0.86), 2\omega_2 + \omega_5(0.33)$                      |
| 69(97)   | 15222.92   | 2759.88   | 0.02      | $\omega_1 + \omega_2 + \omega_8(0.67), 2\omega_2 + \omega_6(0.59)$                      |
| 70(99)   | 15227.39   | 2764.35   | 0.11      | $\omega_9 + \omega_{11}(0.88), 2\omega_9 + \omega_{11}(0.22)$                           |
| 71(101)  | 15240.81   | 2777.77   | 0.18      | $2\omega_2 + \omega_7(0.88), 2\omega_2 + \omega_7 + \omega_9(0.19)$                     |
| 72(111)  | 15306.54   | 2843.49   | 0.12      | $\omega_2 + 2\omega_4(0.91), \omega_2 + 2\omega_4 + \omega_9(0.17)$                     |
| 73(113)  | 15318.13   | 2855.09   | 0.05      | $2\omega_1 + \omega_9(0.87), 2\omega_1 + 2\omega_9(0.22)$                               |
| 74(115)  | 15337.97   | 2874.92   | 0.02      | $2\omega_3 + \omega_5(0.93), 2\omega_3 + \omega_5 + \omega_9(0.21)$                     |
| 75(117)  | 15360.08   | 2897.04   | 0.02      | $2\omega_3 + \omega_7(0.93), 2\omega_3 + \omega_7 + \omega_9(0.22)$                     |
| 76(119)  | 15365.72   | 2902.68   | 0.15      | $2\omega_2 + \omega_9(0.83), 2\omega_2 + 2\omega_9(0.26)$                               |
| 77(121)  | 15373.38   | 2910.33   | 22.28     | $\omega_{12}(0.68), \omega_{10} + \omega_{11}(0.56)$                                    |
| 78(122)  | 15378.36   | 2915.31   | 4.28      | $\omega_1 + \omega_4 + \omega_5(0.51), \omega_{13}(0.47)$                               |
| 79(123)  | 15380.44   | 2917.40   | 1.70      | $\omega_1 + \omega_4 + \omega_6(0.81), \omega_{10} + \omega_{11}(0.22)$                 |
| 80(124)  | 15384.20   | 2921.15   | 2.42      | $\omega_1 + \omega_4 + \omega_5(0.59), 2\omega_{10}(0.52)$                              |
| 81(125)  | 15395.51   | 2932.47   | 0.04      | $\omega_1 + \omega_3 + \omega_9(0.88), \omega_1 + \omega_3 + 2\omega_9(0.27)$           |
| 82(126)  | 15399.55   | 2936.51   | 0.43      | $\omega_2 + \omega_4 + \omega_6(0.73), \omega_1 + \omega_4 + \omega_8(0.44)$            |
| 83(128)  | 15412.59   | 2949.55   | 0.24      | $\omega_1 + \omega_4 + \omega_8(0.79), \omega_2 + \omega_4 + \omega_6(0.45)$            |
| 84(130)  | 15418.97   | 2955.93   | 6.48      | $2\omega_{10}(0.63), \omega_{13}(0.52)$                                                 |
| 85(132)  | 15430.79   | 2967.75   | 0.82      | $\omega_2 + \omega_4 + \omega_7(0.81), \omega_{13}(0.21)$                               |
| 86(133)  | 15446.74   | 2983.70   | 0.08      | $\omega_2 + \omega_4 + \omega_8(0.92), \omega_2 + \omega_4 + \omega_8 + \omega_9(0.18)$ |
| 87(134)  | 15456.53   | 2993.48   | 18.20     | $\omega_{10} + \omega_{11}(0.64), \omega_{12}(0.53)$                                    |
| 88(135)  | 15461.08   | 2998.04   | 3.57      | $2\omega_{11}(0.73), \omega_{13}(0.37)$                                                 |
| 89(137)  | 15466.77   | 3003.73   | 0.36      | $\omega_3 + \omega_4 + \omega_5(0.68), \omega_1 + 2\omega_5(0.47)$                      |
| 90(138)  | 15473.97   | 3010.92   | 0.05      | $2\omega_3 + \omega_9(0.85), 2\omega_3 + 2\omega_9(0.31)$                               |
| 91(141)  | 15488.74   | 3025.69   | 0.23      | $\omega_3 + \omega_4 + \omega_7(0.88), \omega_3 + \omega_5 + \omega_6(0.2)$             |
| 92(142)  | 15492.09   | 3029.04   | 0.03      | $\omega_{14}(0.85), \omega_{13} + \omega_{14}(0.2)$                                     |
| 93(143)  | 15495.05   | 3032.01   | 3.51      | $\omega_1 + 2\omega_5(0.63), \omega_1 + 2\omega_6(0.61)$                                |
| 94(144)  | 15499.15   | 3036.11   | 0.24      | $\omega_3 + \omega_4 + \omega_8(0.76), \omega_1 + \omega_5 + \omega_8(0.49)$            |
| 95(145)  | 15499.17   | 3036.12   | 3.37      | $\omega_1 + \omega_6 + \omega_8(0.55), 2\omega_1 + \omega_{10}(0.54)$                   |
| 96(146)  | 15503.65   | 3040.60   | 41.70     | $\omega_{15}(0.8), \omega_1 + 2\omega_8(0.23)$                                          |
| 97(147)  | 15506.24   | 3043.20   | 0.05      | $\omega_2 + 2\omega_6(0.72), 2\omega_1 + \omega_{10}(0.38)$                             |
| 98(148)  | 15507.08   | 3044.04   | 0.20      | $\omega_1 + \omega_5 + \omega_8(0.63), \omega_3 + \omega_4 + \omega_8(0.54)$            |
| 99(153)  | 15525.49   | 3062.44   | 0.14      | $\omega_1 + \omega_6 + \omega_8(0.62), 2\omega_1 + \omega_{10}(0.52)$                   |
| 100(154) | 15528.55   | 3065.51   | 0.19      | $2\omega_1 + \omega_{11}(0.58), \omega_1 + \omega_5 + \omega_8(0.41)$                   |
| 101(155) | 15528.99   | 3065.95   | 3.11      | $\omega_1 + \omega_2 + \omega_{10}(0.69), \omega_2 + \omega_6 + \omega_8(0.44)$         |
| 102(157) | 15534.30   | 3071.26   | 1.48      | $\omega_1 + 2\omega_8(0.76), \omega_1 + \omega_2 + \omega_{10}(0.37)$                   |
| 103(160) | 15545.26   | 3082.22   | 1.64      | $\omega_2 + \omega_5 + \omega_7(0.69), \omega_1 + 2\omega_7(0.35)$                      |
| 104(164) | 15558.12   | 3095.07   | 0.14      | $\omega_2 + \omega_6 + \omega_8(0.78), \omega_1 + \omega_2 + \omega_{10}(0.41)$         |
| 105(165) | 15565.66   | 3102.62   | 0.02      | $\omega_2 + 2\omega_7(0.9), \omega_1 + \omega_5 + \omega_7(0.18)$                       |

Table 4 (continued)

| Number   | Eigenvalue | Frequency | Intensity | Assignment                                                                      |
|----------|------------|-----------|-----------|---------------------------------------------------------------------------------|
| 106(169) | 15572.90   | 3109.86   | 0.12      | $2\omega_2 + \omega_{10}(0.9), 2\omega_2 + \omega_9 + \omega_{10}(0.17)$        |
| 107(174) | 15591.37   | 3128.33   | 0.01      | $2\omega_2 + \omega_{11}(0.82), 4\omega_2(0.24)$                                |
| 108(178) | 15605.51   | 3142.46   | 0.05      | $\omega_3 + \omega_6 + \omega_7(0.88), \omega_3 + \omega_5 + \omega_8(0.24)$    |
| 109(183) | 15622.74   | 3159.69   | 0.04      | $\omega_1 + \omega_3 + \omega_{11}(0.69), \omega_3 + \omega_5 + \omega_8(0.53)$ |
| 110(188) | 15632.84   | 3169.80   | 0.05      | $4\omega_1(0.77), 2\omega_1 + \omega_{11}(0.38)$                                |

**Table 5** Intensity selection calculation for the PES + diagonal Coriolis operator with  $F = 200$  eigenvalues of  $C_2H_4O$ . The parameters are  $p = 8$ ,  $E_{max} = 25000\text{cm}^{-1}$ ,  $\varepsilon = 0.005$  and  $\varepsilon_f = 0.1$  km/mol.

| Number  | Eigenvalue | Frequency | Intensity | Assignment                                                              |
|---------|------------|-----------|-----------|-------------------------------------------------------------------------|
| 1(1)    | 13257.91   | 794.87    | 0.12      | $\omega_1(0.97), \omega_1 + \omega_9(0.14)$                             |
| 2(2)    | 13286.12   | 823.08    | 12.89     | $\omega_2(0.96), \omega_2 + \omega_9(0.16)$                             |
| 3(3)    | 13342.33   | 879.29    | 79.08     | $\omega_3(0.97), \omega_3 + \omega_9(0.17)$                             |
| 4(5)    | 13586.04   | 1123.00   | 0.79      | $\omega_6(0.96), \omega_6 + \omega_9(0.14)$                             |
| 5(7)    | 13610.33   | 1147.28   | 3.81      | $\omega_7(0.97), \omega_7 + \omega_9(0.15)$                             |
| 6(9)    | 13734.35   | 1271.30   | 15.41     | $\omega_9(0.94), 2\omega_9(0.22)$                                       |
| 7(10)   | 13932.07   | 1469.03   | 0.11      | $\omega_{10}(0.97), \omega_9 + \omega_{10}(0.13)$                       |
| 8(11)   | 13959.97   | 1496.92   | 3.82      | $\omega_{11}(0.94), 2\omega_1(0.19)$                                    |
| 9(12)   | 14054.54   | 1591.49   | 0.38      | $2\omega_1(0.94), \omega_{11}(0.18)$                                    |
| 10(14)  | 14106.37   | 1643.32   | 0.44      | $2\omega_2(0.92), 2\omega_2 + \omega_9(0.18)$                           |
| 11(16)  | 14161.56   | 1698.51   | 0.34      | $\omega_2 + \omega_3(0.94), \omega_2 + \omega_3 + \omega_9(0.19)$       |
| 12(18)  | 14273.55   | 1810.51   | 0.10      | $\omega_1 + \omega_4(0.96), \omega_1 + \omega_4 + \omega_9(0.15)$       |
| 13(19)  | 14298.24   | 1835.19   | 0.53      | $\omega_2 + \omega_4(0.94), \omega_2 + \omega_4 + \omega_9(0.17)$       |
| 14(20)  | 14355.09   | 1892.05   | 0.10      | $\omega_3 + \omega_4(0.92), \omega_1 + \omega_5(0.26)$                  |
| 15(21)  | 14373.69   | 1910.64   | 1.37      | $\omega_1 + \omega_5(0.91), \omega_3 + \omega_4(0.26)$                  |
| 16(22)  | 14375.65   | 1912.60   | 0.48      | $\omega_1 + \omega_6(0.93), \omega_1 + \omega_6 + \omega_9(0.14)$       |
| 17(23)  | 14393.92   | 1930.87   | 0.29      | $\omega_1 + \omega_8(0.81), \omega_2 + \omega_6(0.48)$                  |
| 18(25)  | 14405.24   | 1942.20   | 0.46      | $\omega_2 + \omega_6(0.8), \omega_1 + \omega_8(0.5)$                    |
| 19(29)  | 14462.70   | 1999.66   | 1.24      | $\omega_3 + \omega_6(0.95), \omega_3 + \omega_6 + \omega_9(0.18)$       |
| 20(30)  | 14464.05   | 2001.00   | 0.17      | $\omega_3 + \omega_5(0.96), \omega_3 + \omega_5 + \omega_9(0.18)$       |
| 21(31)  | 14486.13   | 2023.08   | 0.21      | $\omega_3 + \omega_7(0.96), \omega_3 + \omega_7 + \omega_9(0.19)$       |
| 22(34)  | 14525.68   | 2062.63   | 0.13      | $\omega_1 + \omega_9(0.93), \omega_1 + 2\omega_9(0.23)$                 |
| 23(36)  | 14593.76   | 2130.72   | 0.49      | $\omega_4 + \omega_6(0.92), \omega_4 + \omega_6 + \omega_9(0.15)$       |
| 24(37)  | 14599.78   | 2136.74   | 0.57      | $\omega_4 + \omega_5(0.93), \omega_4 + \omega_5 + \omega_9(0.15)$       |
| 25(39)  | 14617.71   | 2154.66   | 1.53      | $\omega_4 + \omega_7(0.92), \omega_5 + \omega_6(0.22)$                  |
| 26(40)  | 14630.84   | 2167.79   | 0.13      | $\omega_4 + \omega_8(0.96), \omega_4 + \omega_8 + \omega_9(0.15)$       |
| 27(42)  | 14705.89   | 2242.85   | 1.28      | $\omega_5 + \omega_6(0.91), \omega_4 + \omega_7(0.24)$                  |
| 28(46)  | 14732.26   | 2269.22   | 0.10      | $\omega_6 + \omega_7(0.91), \omega_5 + \omega_8(0.21)$                  |
| 29(47)  | 14732.28   | 2269.23   | 0.12      | $\omega_5 + \omega_7(0.85), \omega_4 + \omega_9(0.37)$                  |
| 30(48)  | 14740.12   | 2277.07   | 0.17      | $\omega_6 + \omega_8(0.85), \omega_1 + \omega_{10}(0.44)$               |
| 31(53)  | 14758.83   | 2295.78   | 0.14      | $\omega_7 + \omega_8(0.95), \omega_7 + \omega_8 + \omega_9(0.16)$       |
| 32(55)  | 14776.20   | 2313.16   | 0.54      | $\omega_2 + \omega_{11}(0.9), 3\omega_2(0.19)$                          |
| 33(56)  | 14810.79   | 2347.74   | 0.15      | $\omega_3 + \omega_{10}(0.96), \omega_3 + \omega_9 + \omega_{10}(0.17)$ |
| 34(59)  | 14853.44   | 2390.40   | 0.24      | $\omega_6 + \omega_9(0.9), \omega_6 + 2\omega_9(0.22)$                  |
| 35(60)  | 14854.87   | 2391.83   | 0.15      | $\omega_5 + \omega_9(0.92), \omega_5 + 2\omega_9(0.23)$                 |
| 36(62)  | 14879.17   | 2416.13   | 0.37      | $\omega_7 + \omega_9(0.92), \omega_7 + 2\omega_9(0.24)$                 |
| 37(74)  | 15048.79   | 2585.74   | 0.36      | $\omega_6 + \omega_{10}(0.93), \omega_5 + \omega_{11}(0.22)$            |
| 38(75)  | 15053.48   | 2590.44   | 0.15      | $\omega_5 + \omega_{10}(0.92), \omega_6 + \omega_{11}(0.27)$            |
| 39(78)  | 15066.80   | 2603.76   | 0.75      | $\omega_8 + \omega_{10}(0.86), \omega_7 + \omega_{11}(0.38)$            |
| 40(80)  | 15081.15   | 2618.11   | 0.20      | $\omega_5 + \omega_{11}(0.89), \omega_6 + \omega_{10}(0.24)$            |
| 41(83)  | 15106.45   | 2643.40   | 1.66      | $\omega_7 + \omega_{11}(0.84), \omega_8 + \omega_{10}(0.41)$            |
| 42(93)  | 15201.40   | 2738.35   | 0.17      | $2\omega_1 + \omega_7(0.89), \omega_1 + \omega_2 + \omega_5(0.27)$      |
| 43(99)  | 15227.43   | 2764.39   | 0.11      | $\omega_9 + \omega_{11}(0.88), 2\omega_9 + \omega_{11}(0.22)$           |
| 44(101) | 15240.84   | 2777.79   | 0.18      | $2\omega_2 + \omega_7(0.88), 2\omega_2 + \omega_7 + \omega_9(0.19)$     |
| 45(111) | 15306.59   | 2843.54   | 0.12      | $\omega_2 + 2\omega_4(0.91), \omega_2 + 2\omega_4 + \omega_9(0.17)$     |
| 46(119) | 15365.80   | 2902.75   | 0.15      | $2\omega_2 + \omega_9(0.83), 2\omega_2 + 2\omega_9(0.26)$               |
| 47(121) | 15373.39   | 2910.34   | 22.31     | $\omega_{12}(0.68), \omega_{10} + \omega_{11}(0.56)$                    |
| 48(122) | 15378.40   | 2915.36   | 4.32      | $\omega_1 + \omega_4 + \omega_5(0.51), \omega_{13}(0.48)$               |
| 49(123) | 15380.49   | 2917.44   | 1.68      | $\omega_1 + \omega_4 + \omega_6(0.81), \omega_{10} + \omega_{11}(0.22)$ |

Table 5 (continued)

| Number  | Eigenvalue | Frequency | Intensity | Assignment                                                                      |
|---------|------------|-----------|-----------|---------------------------------------------------------------------------------|
| 50(124) | 15384.25   | 2921.20   | 2.39      | $\omega_1 + \omega_4 + \omega_5(0.59), 2\omega_{10}(0.52)$                      |
| 51(126) | 15399.59   | 2936.54   | 0.43      | $\omega_2 + \omega_4 + \omega_6(0.73), \omega_1 + \omega_4 + \omega_8(0.44)$    |
| 52(128) | 15412.62   | 2949.57   | 0.24      | $\omega_1 + \omega_4 + \omega_8(0.79), \omega_2 + \omega_4 + \omega_6(0.45)$    |
| 53(130) | 15419.00   | 2955.95   | 6.48      | $2\omega_{10}(0.63), \omega_{13}(0.52)$                                         |
| 54(132) | 15430.87   | 2967.83   | 0.81      | $\omega_2 + \omega_4 + \omega_7(0.81), \omega_{13}(0.21)$                       |
| 55(134) | 15456.55   | 2993.50   | 18.20     | $\omega_{10} + \omega_{11}(0.64), \omega_{12}(0.53)$                            |
| 56(135) | 15461.13   | 2998.09   | 3.57      | $2\omega_{11}(0.73), \omega_{13}(0.37)$                                         |
| 57(137) | 15466.84   | 3003.80   | 0.36      | $\omega_3 + \omega_4 + \omega_5(0.68), \omega_1 + 2\omega_5(0.47)$              |
| 58(141) | 15488.79   | 3025.75   | 0.23      | $\omega_3 + \omega_4 + \omega_7(0.88), \omega_3 + \omega_5 + \omega_6(0.2)$     |
| 59(143) | 15495.07   | 3032.03   | 3.52      | $\omega_1 + 2\omega_5(0.63), \omega_1 + 2\omega_6(0.61)$                        |
| 60(144) | 15499.22   | 3036.17   | 3.36      | $\omega_1 + \omega_6 + \omega_8(0.55), 2\omega_1 + \omega_{10}(0.54)$           |
| 61(145) | 15499.22   | 3036.18   | 0.24      | $\omega_3 + \omega_4 + \omega_8(0.76), \omega_1 + \omega_5 + \omega_8(0.49)$    |
| 62(146) | 15503.66   | 3040.61   | 41.70     | $\omega_{15}(0.8), \omega_1 + 2\omega_8(0.23)$                                  |
| 63(148) | 15507.15   | 3044.11   | 0.20      | $\omega_1 + \omega_5 + \omega_8(0.63), \omega_3 + \omega_4 + \omega_8(0.54)$    |
| 64(153) | 15525.54   | 3062.49   | 0.14      | $\omega_1 + \omega_6 + \omega_8(0.62), 2\omega_1 + \omega_{10}(0.52)$           |
| 65(154) | 15528.65   | 3065.60   | 0.19      | $2\omega_1 + \omega_{11}(0.58), \omega_1 + \omega_5 + \omega_8(0.41)$           |
| 66(155) | 15529.02   | 3065.97   | 3.11      | $\omega_1 + \omega_2 + \omega_{10}(0.69), \omega_2 + \omega_6 + \omega_8(0.44)$ |
| 67(157) | 15534.32   | 3071.28   | 1.48      | $\omega_1 + 2\omega_8(0.76), \omega_1 + \omega_2 + \omega_{10}(0.37)$           |
| 68(160) | 15545.29   | 3082.24   | 1.64      | $\omega_2 + \omega_5 + \omega_7(0.69), \omega_1 + 2\omega_7(0.35)$              |
| 69(164) | 15558.15   | 3095.10   | 0.14      | $\omega_2 + \omega_6 + \omega_8(0.78), \omega_1 + \omega_2 + \omega_{10}(0.41)$ |
| 70(169) | 15572.95   | 3109.90   | 0.12      | $2\omega_2 + \omega_{10}(0.9), 2\omega_2 + \omega_9 + \omega_{10}(0.17)$        |

**Table 6** Intensity selection calculation for the PES + diagonal Coriolis operator with  $F = 200$  eigenvalues of  $C_2H_4O$ . The parameters are  $p = 8$ ,  $E_{max} = 25000\text{cm}^{-1}$ ,  $\varepsilon = 0.005$  and  $\varepsilon_I = 1.0$  km/mol.

| Number  | Eigenvalue | Frequency | Intensity | Assignment                                                                      |
|---------|------------|-----------|-----------|---------------------------------------------------------------------------------|
| 1(2)    | 13286.14   | 823.10    | 12.89     | $\omega_2(0.96), \omega_2 + \omega_9(0.16)$                                     |
| 2(3)    | 13342.34   | 879.30    | 79.08     | $\omega_3(0.97), \omega_3 + \omega_9(0.17)$                                     |
| 3(7)    | 13610.34   | 1147.29   | 3.81      | $\omega_7(0.97), \omega_7 + \omega_9(0.15)$                                     |
| 4(9)    | 13734.36   | 1271.31   | 15.41     | $\omega_9(0.94), 2\omega_9(0.22)$                                               |
| 5(11)   | 13959.98   | 1496.94   | 3.82      | $\omega_{11}(0.94), 2\omega_{11}(0.19)$                                         |
| 6(21)   | 14373.87   | 1910.82   | 1.37      | $\omega_1 + \omega_5(0.91), \omega_3 + \omega_4(0.26)$                          |
| 7(29)   | 14462.72   | 1999.68   | 1.24      | $\omega_3 + \omega_6(0.95), \omega_3 + \omega_6 + \omega_9(0.18)$               |
| 8(39)   | 14617.75   | 2154.70   | 1.53      | $\omega_4 + \omega_7(0.92), \omega_5 + \omega_6(0.22)$                          |
| 9(42)   | 14705.94   | 2242.89   | 1.29      | $\omega_5 + \omega_6(0.91), \omega_4 + \omega_7(0.24)$                          |
| 10(83)  | 15106.52   | 2643.47   | 1.66      | $\omega_7 + \omega_{11}(0.84), \omega_8 + \omega_{10}(0.41)$                    |
| 11(121) | 15373.43   | 2910.38   | 22.36     | $\omega_{12}(0.68), \omega_{10} + \omega_{11}(0.56)$                            |
| 12(122) | 15378.48   | 2915.44   | 4.37      | $\omega_1 + \omega_4 + \omega_5(0.5), 2\omega_{10}(0.48)$                       |
| 13(123) | 15380.61   | 2917.56   | 1.63      | $\omega_1 + \omega_4 + \omega_6(0.81), \omega_{10} + \omega_{11}(0.21)$         |
| 14(124) | 15384.32   | 2921.28   | 2.33      | $\omega_1 + \omega_4 + \omega_5(0.6), 2\omega_{10}(0.52)$                       |
| 15(129) | 15419.05   | 2956.01   | 6.52      | $2\omega_{10}(0.63), \omega_{13}(0.52)$                                         |
| 16(134) | 15456.63   | 2993.58   | 18.21     | $\omega_{10} + \omega_{11}(0.64), \omega_{12}(0.53)$                            |
| 17(135) | 15461.25   | 2998.20   | 3.58      | $2\omega_{11}(0.73), \omega_{13}(0.37)$                                         |
| 18(143) | 15495.19   | 3032.14   | 3.57      | $\omega_1 + 2\omega_5(0.62), \omega_1 + 2\omega_6(0.61)$                        |
| 19(144) | 15499.38   | 3036.33   | 3.36      | $2\omega_1 + \omega_{10}(0.54), \omega_1 + \omega_6 + \omega_8(0.54)$           |
| 20(146) | 15503.72   | 3040.68   | 41.67     | $\omega_{15}(0.8), \omega_1 + 2\omega_8(0.23)$                                  |
| 21(155) | 15529.13   | 3066.08   | 3.09      | $\omega_1 + \omega_2 + \omega_{10}(0.69), \omega_2 + \omega_6 + \omega_8(0.44)$ |
| 22(157) | 15534.40   | 3071.36   | 1.48      | $\omega_1 + 2\omega_8(0.77), \omega_1 + \omega_2 + \omega_{10}(0.37)$           |
| 23(160) | 15545.39   | 3082.35   | 1.63      | $\omega_2 + \omega_5 + \omega_7(0.69), \omega_1 + 2\omega_7(0.35)$              |

**Table 7** Intensity selection calculation for the PES + diagonal Coriolis operator with  $F = 200$  eigenvalues of  $C_2H_4O$ . The parameters are  $p = 8$ ,  $E_{max} = 25000\text{cm}^{-1}$ ,  $\varepsilon = 0.005$  and  $\varepsilon_I = 10.0$  km/mol.

| Number | Eigenvalue | Frequency | Intensity | Assignment                                           |
|--------|------------|-----------|-----------|------------------------------------------------------|
| 1(2)   | 13286.15   | 823.09    | 12.89     | $\omega_2(0.96), \omega_2 + \omega_9(0.16)$          |
| 2(3)   | 13342.36   | 879.30    | 79.08     | $\omega_3(0.97), \omega_3 + \omega_9(0.17)$          |
| 3(9)   | 13734.39   | 1271.33   | 15.41     | $\omega_9(0.94), 2\omega_9(0.22)$                    |
| 4(121) | 15373.48   | 2910.42   | 22.59     | $\omega_{12}(0.69), \omega_{10} + \omega_{11}(0.56)$ |
| 5(134) | 15456.70   | 2993.64   | 18.26     | $\omega_{10} + \omega_{11}(0.64), \omega_{12}(0.53)$ |
| 6(146) | 15504.00   | 3040.94   | 41.85     | $\omega_{15}(0.8), \omega_1 + 2\omega_8(0.23)$       |



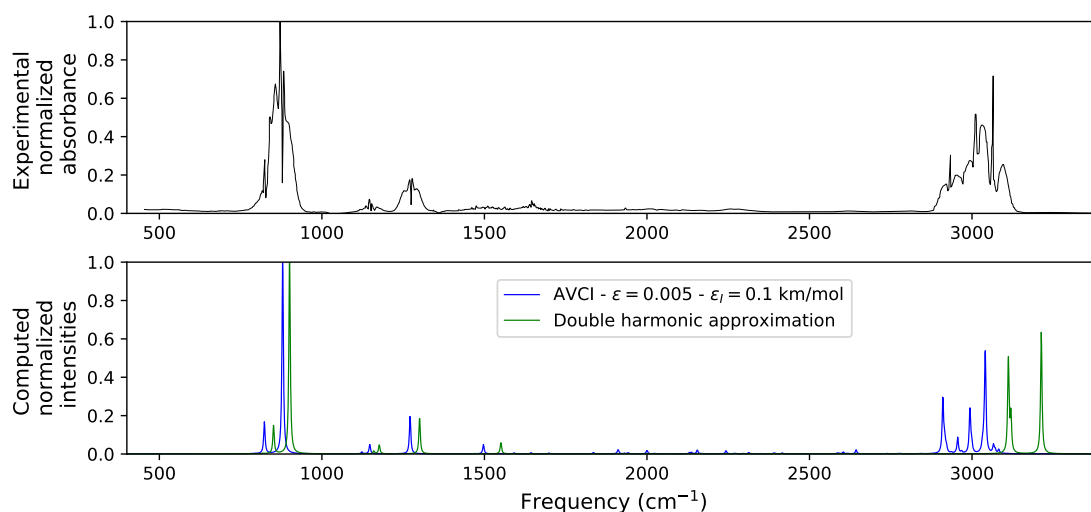

**Fig. 1** Comparison between experimental data<sup>2,3</sup> for  $C_2H_4O$  and an A-VCI computation using SI ( $\epsilon_I = 0.1$  km/mol) with the following parameters:  $F = 200$ ,  $p = 8$ ,  $\epsilon = 0.005$  and  $E_{max} = 25,000$   $cm^{-1}$ . The bandshapes have been created using a Lorentzian profile with a width at half height of  $15$   $cm^{-1}$  and normalized.

**Table 8** Calculation in double harmonic approximation for vibrational states of  $C_2H_4O$  with non-zero intensity.

| Number  | Eigenvalue | Frequency | Intensity | Assignment       |
|---------|------------|-----------|-----------|------------------|
| 1(1)    | 13459.05   | 817.66    | 0.16      | $\omega_1(1)$    |
| 2(2)    | 13492.67   | 851.27    | 11.10     | $\omega_2(1)$    |
| 3(3)    | 13541.92   | 900.52    | 77.89     | $\omega_3(1)$    |
| 4(6)    | 13801.04   | 1159.64   | 1.10      | $\omega_6(1)$    |
| 5(7)    | 13817.88   | 1176.48   | 3.57      | $\omega_7(1)$    |
| 6(9)    | 13941.95   | 1300.56   | 14.21     | $\omega_9(1)$    |
| 7(11)   | 14192.01   | 1550.62   | 4.45      | $\omega_{11}(1)$ |
| 8(135)  | 15753.13   | 3111.74   | 37.05     | $\omega_{12}(1)$ |
| 9(138)  | 15760.97   | 3119.57   | 14.74     | $\omega_{13}(1)$ |
| 10(168) | 15854.50   | 3213.11   | 47.68     | $\omega_{15}(1)$ |

## 2.2 $C_4H_4N_2$

**Table 9** Calculation in double harmonic approximation for vibrational states of  $C_4H_4N_2$  with non-zero intensity.

| Number   | Eigenvalue | Frequency | Intensity | Assignment       |
|----------|------------|-----------|-----------|------------------|
| 1(2)     | 17191.50   | 423.13    | 25.50     | $\omega_2(1)$    |
| 2(8)     | 17573.72   | 805.35    | 31.31     | $\omega_6(1)$    |
| 3(16)    | 17800.80   | 1032.44   | 30.03     | $\omega_{11}(1)$ |
| 4(19)    | 17851.32   | 1082.96   | 11.18     | $\omega_{12}(1)$ |
| 5(24)    | 17925.28   | 1156.92   | 8.45      | $\omega_{13}(1)$ |
| 6(25)    | 17954.45   | 1186.09   | 3.63      | $\omega_{14}(1)$ |
| 7(50)    | 18204.14   | 1435.77   | 31.44     | $\omega_{17}(1)$ |
| 8(61)    | 18280.10   | 1511.74   | 0.23      | $\omega_{18}(1)$ |
| 9(2496)  | 19943.09   | 3174.72   | 3.24      | $\omega_{22}(1)$ |
| 10(2557) | 19959.25   | 3190.88   | 65.91     | $\omega_{23}(1)$ |

**Table 10** Intensity selection calculation for the PES + diagonal Coriolis operator with  $F = 2400$  eigenvalues of  $C_4H_4N_2$ . The parameters are  $p = 8$ ,  $E_{max} = 22000$   $cm^{-1}$ ,  $\epsilon = 0.05$  and  $\epsilon_I = 0.1$  km/mol.

| Number | Eigenvalue | Frequency | Intensity | Assignment                                     |
|--------|------------|-----------|-----------|------------------------------------------------|
| 1(2)   | 16984.35   | 418.18    | 26.47     | $\omega_2(0.97), \omega_2 + \omega_{10}(0.15)$ |
| 2(8)   | 17354.45   | 788.28    | 31.73     | $\omega_6(0.96), \omega_6 + \omega_{10}(0.17)$ |

Table 10 (continued)

| Number   | Eigenvalue | Frequency | Intensity | Assignment                                                                                                |
|----------|------------|-----------|-----------|-----------------------------------------------------------------------------------------------------------|
| 3(17)    | 17600.15   | 1033.97   | 31.15     | $\omega_{11}(0.97), \omega_{10} + \omega_{11}(0.18)$                                                      |
| 4(18)    | 17628.41   | 1062.23   | 0.20      | $\omega_1 + \omega_4(0.97), \omega_1 + \omega_4 + \omega_{10}(0.15)$                                      |
| 5(19)    | 17634.31   | 1068.13   | 9.58      | $\omega_{12}(0.92), \omega_1 + \omega_5(0.28)$                                                            |
| 6(20)    | 17675.36   | 1109.18   | 1.60      | $\omega_1 + \omega_5(0.93), \omega_{12}(0.27)$                                                            |
| 7(23)    | 17710.52   | 1144.34   | 7.16      | $\omega_{13}(0.91), \omega_2 + \omega_5(0.31)$                                                            |
| 8(25)    | 17726.40   | 1160.22   | 4.12      | $\omega_{14}(0.94), \omega_{10} + \omega_{14}(0.24)$                                                      |
| 9(26)    | 17758.93   | 1192.75   | 0.48      | $\omega_2 + \omega_5(0.92), \omega_{13}(0.31)$                                                            |
| 10(37)   | 17912.36   | 1346.19   | 1.01      | $\omega_2 + \omega_7(0.94), \omega_{17}(0.15)$                                                            |
| 11(43)   | 17954.54   | 1388.36   | 0.23      | $\omega_2 + \omega_8(0.96), \omega_2 + \omega_8 + \omega_{10}(0.15)$                                      |
| 12(48)   | 17985.35   | 1419.17   | 30.09     | $\omega_{17}(0.95), \omega_{10} + \omega_{17}(0.19)$                                                      |
| 13(57)   | 18063.02   | 1496.85   | 0.21      | $\omega_{18}(0.95), \omega_{10} + \omega_{18}(0.19)$                                                      |
| 14(85)   | 18201.65   | 1635.48   | 0.18      | $\omega_3 + \omega_{11}(0.96), \omega_3 + \omega_{10} + \omega_{11}(0.18)$                                |
| 15(93)   | 18247.03   | 1680.86   | 0.81      | $\omega_6 + \omega_7(0.7), \omega_3 + \omega_{12}(0.56)$                                                  |
| 16(94)   | 18253.87   | 1687.70   | 0.96      | $\omega_3 + \omega_{12}(0.65), \omega_6 + \omega_7(0.55)$                                                 |
| 17(107)  | 18300.50   | 1734.32   | 1.78      | $\omega_6 + \omega_8(0.89), \omega_7 + \omega_9(0.24)$                                                    |
| 18(111)  | 18312.39   | 1746.21   | 0.26      | $\omega_5 + \omega_9(0.93), \omega_6 + \omega_7(0.2)$                                                     |
| 19(118)  | 18331.10   | 1764.93   | 0.20      | $\omega_3 + \omega_{14}(0.83), \omega_4 + \omega_{11}(0.44)$                                              |
| 20(135)  | 18387.85   | 1821.67   | 0.17      | $\omega_6 + \omega_{10}(0.92), \omega_6 + 2\omega_{10}(0.25)$                                             |
| 21(161)  | 18463.46   | 1897.28   | 0.28      | $\omega_1 + \omega_{19}(0.94), \omega_1 + \omega_{10} + \omega_{19}(0.19)$                                |
| 22(167)  | 18479.84   | 1913.66   | 0.69      | $\omega_7 + \omega_9(0.89), \omega_6 + \omega_8(0.26)$                                                    |
| 23(181)  | 18511.01   | 1944.83   | 2.32      | $\omega_8 + \omega_9(0.92), \omega_6 + \omega_7(0.19)$                                                    |
| 24(259)  | 18664.62   | 2098.44   | 0.27      | $\omega_{10} + \omega_{12}(0.89), 2\omega_{10} + \omega_{12}(0.28)$                                       |
| 25(266)  | 18675.80   | 2109.62   | 0.40      | $\omega_7 + \omega_{14}(0.93), \omega_7 + \omega_{10} + \omega_{14}(0.22)$                                |
| 26(432)  | 18890.76   | 2324.58   | 0.17      | $\omega_{12} + \omega_{15}(0.79), \omega_3 + \omega_6 + \omega_7(0.33)$                                   |
| 27(702)  | 19115.62   | 2549.44   | 0.12      | $\omega_9 + \omega_{19}(0.95), \omega_9 + \omega_{10} + \omega_{19}(0.2)$                                 |
| 28(912)  | 19240.20   | 2674.02   | 0.26      | $\omega_{15} + \omega_{17}(0.72), \omega_{12} + \omega_{20}(0.44)$                                        |
| 29(960)  | 19260.52   | 2694.34   | 0.12      | $\omega_{13} + \omega_{19}(0.87), \omega_{12} + \omega_{20}(0.34)$                                        |
| 30(991)  | 19277.50   | 2711.32   | 0.11      | $\omega_{14} + \omega_{19}(0.71), \omega_2 + \omega_6 + \omega_{18}(0.49)$                                |
| 31(1159) | 19351.88   | 2785.70   | 0.12      | $\omega_{16} + \omega_{17}(0.67), \omega_6 + \omega_8 + \omega_{10}(0.46)$                                |
| 32(1285) | 19403.23   | 2837.05   | 2.59      | $\omega_{16} + \omega_{18}(0.87), \omega_2 + \omega_8 + \omega_{16}(0.23)$                                |
| 33(1364) | 19436.00   | 2869.82   | 0.29      | $\omega_1 + 2\omega_6 + \omega_8(0.8), \omega_1 + \omega_6 + \omega_7 + \omega_9(0.27)$                   |
| 34(1645) | 19530.13   | 2963.95   | 0.27      | $\omega_2 + \omega_7 + \omega_{20}(0.84), \omega_{17} + \omega_{20}(0.24)$                                |
| 35(1656) | 19533.44   | 2967.27   | 0.46      | $\omega_{17} + \omega_{19}(0.86), \omega_{22}(0.25)$                                                      |
| 36(1659) | 19534.42   | 2968.24   | 0.25      | $\omega_6 + \omega_7 + \omega_{15}(0.56), \omega_1 + \omega_3 + \omega_5 + \omega_{15}(0.37)$             |
| 37(1677) | 19539.76   | 2973.59   | 0.19      | $\omega_1 + \omega_3 + \omega_5 + \omega_{15}(0.55), \omega_1 + \omega_5 + 2\omega_7(0.39)$               |
| 38(1690) | 19543.86   | 2977.68   | 0.83      | $\omega_6 + \omega_7 + \omega_{15}(0.51), 2\omega_7 + \omega_{12}(0.48)$                                  |
| 39(1719) | 19551.33   | 2985.15   | 0.12      | $2\omega_5 + \omega_{17}(0.95), 2\omega_5 + \omega_{10} + \omega_{17}(0.16)$                              |
| 40(1728) | 19553.17   | 2986.99   | 15.01     | $\omega_{17} + \omega_{20}(0.65), \omega_{23}(0.44)$                                                      |
| 41(1733) | 19554.33   | 2988.15   | 0.49      | $2\omega_2 + \omega_{10} + \omega_{12}(0.86), \omega_1 + \omega_2 + \omega_{10} + \omega_{13}(0.26)$      |
| 42(1798) | 19573.86   | 3007.68   | 0.18      | $2\omega_6 + \omega_{17}(0.85), \omega_5 + \omega_9 + \omega_{15}(0.32)$                                  |
| 43(1840) | 19587.73   | 3021.56   | 0.37      | $2\omega_7 + \omega_{13}(0.56), \omega_1 + \omega_5 + \omega_7 + \omega_8(0.53)$                          |
| 44(1845) | 19588.74   | 3022.57   | 0.74      | $\omega_{18} + \omega_{19}(0.84), \omega_{17} + \omega_{20}(0.37)$                                        |
| 45(1861) | 19593.41   | 3027.23   | 3.95      | $\omega_{22}(0.63), 2\omega_7 + \omega_{13}(0.41)$                                                        |
| 46(1867) | 19596.66   | 3030.48   | 0.20      | $\omega_6 + \omega_8 + \omega_{15}(0.83), \omega_1 + \omega_5 + \omega_7 + \omega_8(0.24)$                |
| 47(1877) | 19599.24   | 3033.06   | 0.67      | $\omega_1 + \omega_5 + \omega_7 + \omega_8(0.57), 2\omega_7 + \omega_{13}(0.44)$                          |
| 48(1884) | 19601.92   | 3035.75   | 0.75      | $2\omega_9 + \omega_{12}(0.56), \omega_1 + \omega_6 + \omega_7 + \omega_9(0.5)$                           |
| 49(1910) | 19610.01   | 3043.83   | 1.45      | $2\omega_9 + \omega_{12}(0.68), \omega_1 + \omega_6 + \omega_7 + \omega_9(0.47)$                          |
| 50(1933) | 19618.93   | 3052.75   | 0.21      | $\omega_1 + \omega_5 + 2\omega_8(0.72), 2\omega_8 + \omega_{12}(0.34)$                                    |
| 51(1937) | 19619.66   | 3053.48   | 0.10      | $\omega_1 + \omega_2 + 2\omega_3 + \omega_{11}(0.83), \omega_2 + \omega_3 + \omega_9 + \omega_{11}(0.38)$ |
| 52(1943) | 19620.13   | 3053.96   | 0.81      | $3\omega_1 + \omega_2 + \omega_5 + \omega_6(0.65), 3\omega_1 + \omega_5 + \omega_{15}(0.28)$              |
| 53(1946) | 19620.49   | 3054.31   | 1.63      | $2\omega_1 + \omega_3 + \omega_5 + \omega_9(0.63), 3\omega_1 + \omega_2 + \omega_5 + \omega_6(0.32)$      |
| 54(1964) | 19624.94   | 3058.76   | 1.76      | $\omega_3 + \omega_{10} + \omega_{17}(0.82), \omega_3 + 2\omega_{10} + \omega_{17}(0.25)$                 |
| 55(1999) | 19635.69   | 3069.52   | 0.18      | $\omega_7 + \omega_8 + \omega_{13}(0.82), \omega_2 + \omega_5 + \omega_7 + \omega_8(0.31)$                |
| 56(2005) | 19639.77   | 3073.59   | 22.96     | $\omega_2 + \omega_3 + \omega_9 + \omega_{11}(0.64), \omega_{23}(0.44)$                                   |
| 57(2008) | 19640.31   | 3074.13   | 26.15     | $\omega_2 + \omega_3 + \omega_9 + \omega_{11}(0.6), \omega_{23}(0.47)$                                    |
| 58(2026) | 19645.12   | 3078.95   | 0.92      | $3\omega_1 + \omega_5 + \omega_{15}(0.71), 2\omega_1 + \omega_{12} + \omega_{15}(0.34)$                   |
| 59(2041) | 19648.35   | 3082.17   | 4.47      | $\omega_1 + \omega_5 + 2\omega_9(0.74), \omega_1 + \omega_6 + \omega_7 + \omega_9(0.28)$                  |
| 60(2047) | 19649.87   | 3083.69   | 0.22      | $\omega_2 + \omega_4 + \omega_6 + \omega_{13}(0.75), \omega_4 + \omega_{13} + \omega_{15}(0.39)$          |
| 61(2102) | 19667.84   | 3101.67   | 0.12      | $2\omega_6 + \omega_{18}(0.79), \omega_{18} + \omega_{20}(0.38)$                                          |
| 62(2110) | 19671.25   | 3105.07   | 0.23      | $\omega_{18} + \omega_{20}(0.55), 2\omega_6 + \omega_{18}(0.52)$                                          |

Table 10 (continued)

| Number | Eigenvalue | Frequency | Intensity | Assignment |
|--------|------------|-----------|-----------|------------|
|--------|------------|-----------|-----------|------------|

**Table 11** Intensity selection calculation for the PES + diagonal Coriolis operator with  $F = 2400$  eigenvalues of  $C_4H_4N_2$ . The parameters are  $\rho = 8$ ,  $E_{max} = 22000\text{cm}^{-1}$ ,  $\varepsilon = 0.04$  and  $\varepsilon_l = 0.1$  km/mol.

| Number   | Eigenvalue | Frequency | Intensity | Assignment                                                                                       |
|----------|------------|-----------|-----------|--------------------------------------------------------------------------------------------------|
| 1(2)     | 16977.54   | 416.17    | 26.44     | $\omega_2(0.97), \omega_2 + \omega_{10}(0.15)$                                                   |
| 2(8)     | 17344.93   | 783.56    | 31.67     | $\omega_6(0.96), \omega_6 + \omega_{10}(0.17)$                                                   |
| 3(17)    | 17593.46   | 1032.09   | 31.25     | $\omega_{11}(0.97), \omega_{10} + \omega_{11}(0.19)$                                             |
| 4(18)    | 17619.63   | 1058.26   | 0.20      | $\omega_1 + \omega_4(0.97), \omega_1 + \omega_4 + \omega_{10}(0.16)$                             |
| 5(19)    | 17625.96   | 1064.60   | 9.38      | $\omega_{12}(0.92), \omega_1 + \omega_5(0.29)$                                                   |
| 6(20)    | 17665.19   | 1103.82   | 1.70      | $\omega_1 + \omega_5(0.92), \omega_{12}(0.29)$                                                   |
| 7(24)    | 17701.11   | 1139.74   | 7.06      | $\omega_{13}(0.91), \omega_2 + \omega_5(0.31)$                                                   |
| 8(25)    | 17717.03   | 1155.66   | 4.21      | $\omega_{14}(0.94), \omega_{10} + \omega_{14}(0.25)$                                             |
| 9(27)    | 17750.22   | 1188.85   | 0.47      | $\omega_2 + \omega_5(0.92), \omega_{13}(0.31)$                                                   |
| 10(37)   | 17899.87   | 1338.50   | 0.90      | $\omega_2 + \omega_7(0.93), \omega_1 + \omega_8(0.15)$                                           |
| 11(44)   | 17943.88   | 1382.51   | 0.23      | $\omega_2 + \omega_8(0.95), \omega_2 + \omega_8 + \omega_{10}(0.16)$                             |
| 12(49)   | 17977.93   | 1416.56   | 30.22     | $\omega_{17}(0.95), \omega_{10} + \omega_{17}(0.19)$                                             |
| 13(60)   | 18053.38   | 1492.02   | 0.21      | $\omega_{18}(0.95), \omega_{10} + \omega_{18}(0.2)$                                              |
| 14(88)   | 18193.70   | 1632.33   | 0.17      | $\omega_3 + \omega_{11}(0.96), \omega_3 + \omega_{10} + \omega_{11}(0.18)$                       |
| 15(92)   | 18229.10   | 1667.74   | 0.20      | $\omega_3 + \omega_{12}(0.8), \omega_6 + \omega_7(0.45)$                                         |
| 16(94)   | 18237.65   | 1676.29   | 1.60      | $\omega_6 + \omega_7(0.76), \omega_3 + \omega_{12}(0.43)$                                        |
| 17(108)  | 18285.56   | 1724.19   | 1.79      | $\omega_6 + \omega_8(0.87), \omega_7 + \omega_9(0.24)$                                           |
| 18(112)  | 18301.42   | 1740.05   | 0.25      | $\omega_5 + \omega_9(0.93), \omega_6 + \omega_7(0.2)$                                            |
| 19(119)  | 18318.20   | 1756.84   | 0.17      | $\omega_3 + \omega_{14}(0.93), \omega_3 + \omega_{10} + \omega_{14}(0.25)$                       |
| 20(137)  | 18371.80   | 1810.44   | 0.16      | $\omega_6 + \omega_{10}(0.92), \omega_6 + 2\omega_{10}(0.26)$                                    |
| 21(157)  | 18434.08   | 1872.71   | 0.11      | $\omega_4 + \omega_{14}(0.94), \omega_4 + \omega_{10} + \omega_{14}(0.25)$                       |
| 22(164)  | 18448.35   | 1886.99   | 0.27      | $\omega_1 + \omega_{19}(0.94), \omega_1 + \omega_{10} + \omega_{19}(0.2)$                        |
| 23(169)  | 18467.85   | 1906.48   | 0.61      | $\omega_7 + \omega_9(0.91), \omega_6 + \omega_8(0.27)$                                           |
| 24(186)  | 18500.20   | 1938.83   | 2.33      | $\omega_8 + \omega_9(0.92), \omega_6 + \omega_7(0.19)$                                           |
| 25(262)  | 18648.31   | 2086.95   | 0.27      | $\omega_{10} + \omega_{12}(0.88), 2\omega_{10} + \omega_{12}(0.29)$                              |
| 26(267)  | 18655.86   | 2094.49   | 0.40      | $\omega_7 + \omega_{14}(0.93), \omega_7 + \omega_{10} + \omega_{14}(0.22)$                       |
| 27(281)  | 18679.96   | 2118.60   | 0.13      | $\omega_8 + \omega_{13}(0.89), \omega_2 + \omega_5 + \omega_8(0.34)$                             |
| 28(444)  | 18873.29   | 2311.92   | 0.20      | $\omega_{12} + \omega_{15}(0.84), \omega_1 + \omega_2 + \omega_5 + \omega_6(0.32)$               |
| 29(919)  | 19210.49   | 2649.12   | 0.12      | $\omega_{12} + \omega_{20}(0.58), \omega_{15} + \omega_{17}(0.5)$                                |
| 30(985)  | 19243.59   | 2682.23   | 0.21      | $\omega_{13} + \omega_{19}(0.92), \omega_{10} + \omega_{13} + \omega_{19}(0.22)$                 |
| 31(1029) | 19260.33   | 2698.97   | 0.17      | $\omega_{14} + \omega_{19}(0.81), \omega_2 + \omega_7 + \omega_{16}(0.28)$                       |
| 32(1166) | 19324.95   | 2763.58   | 0.11      | $\omega_{16} + \omega_{17}(0.82), \omega_{15} + \omega_{18}(0.25)$                               |
| 33(1268) | 19363.38   | 2802.01   | 0.60      | $\omega_1 + 2\omega_6 + \omega_8(0.63), 2\omega_1 + \omega_2 + \omega_4 + \omega_8(0.36)$        |
| 34(1326) | 19386.24   | 2824.87   | 0.56      | $\omega_3 + \omega_4 + \omega_{18}(0.8), \omega_{16} + \omega_{18}(0.48)$                        |
| 35(1339) | 19391.02   | 2829.66   | 1.52      | $\omega_{16} + \omega_{18}(0.74), \omega_3 + \omega_4 + \omega_{18}(0.52)$                       |
| 36(1550) | 19462.28   | 2900.92   | 0.15      | $\omega_1 + \omega_8 + \omega_{20}(0.73), \omega_2 + \omega_9 + \omega_{18}(0.5)$                |
| 37(1643) | 19492.38   | 2931.02   | 0.12      | $\omega_1 + \omega_5 + 2\omega_7(0.47), \omega_6 + \omega_7 + \omega_{15}(0.46)$                 |
| 38(1687) | 19504.99   | 2943.63   | 0.19      | $\omega_2 + \omega_7 + \omega_{20}(0.73), \omega_1 + \omega_2 + \omega_{10} + \omega_{13}(0.37)$ |
| 39(1725) | 19515.33   | 2953.97   | 0.56      | $\omega_{17} + \omega_{19}(0.84), \omega_{22}(0.26)$                                             |
| 40(1784) | 19531.72   | 2970.35   | 6.99      | $\omega_1 + \omega_6 + \omega_7 + \omega_9(0.48), \omega_1 + \omega_5 + 2\omega_7(0.4)$          |
| 41(1798) | 19536.48   | 2975.11   | 0.19      | $\omega_8 + \omega_9 + \omega_{10}(0.75), \omega_2 + \omega_3 + \omega_6 + \omega_{14}(0.36)$    |
| 42(1799) | 19536.80   | 2975.43   | 0.15      | $\omega_2 + \omega_3 + \omega_6 + \omega_{14}(0.72), \omega_8 + \omega_9 + \omega_{10}(0.4)$     |
| 43(1814) | 19540.37   | 2979.00   | 6.85      | $\omega_{17} + \omega_{20}(0.6), \omega_1 + \omega_6 + \omega_7 + \omega_9(0.41)$                |
| 44(1841) | 19552.07   | 2990.70   | 0.18      | $\omega_2 + \omega_8 + \omega_{20}(0.86), \omega_2 + \omega_3 + \omega_8 + \omega_{10}(0.2)$     |
| 45(1846) | 19553.02   | 2991.66   | 0.14      | $2\omega_6 + \omega_{17}(0.52), \omega_1 + \omega_3 + \omega_9 + \omega_{12}(0.5)$               |
| 46(1849) | 19553.21   | 2991.84   | 0.18      | $2\omega_6 + \omega_{17}(0.76), \omega_1 + \omega_3 + \omega_9 + \omega_{12}(0.34)$              |
| 47(1870) | 19558.85   | 2997.48   | 0.39      | $\omega_1 + \omega_8 + \omega_{19}(0.66), \omega_2 + \omega_7 + \omega_{19}(0.39)$               |
| 48(1901) | 19567.21   | 3005.84   | 0.23      | $3\omega_1 + \omega_6 + \omega_{14}(0.65), \omega_1 + \omega_5 + \omega_7 + \omega_8(0.39)$      |
| 49(1902) | 19567.41   | 3006.05   | 0.25      | $3\omega_1 + \omega_6 + \omega_{14}(0.66), \omega_1 + \omega_5 + \omega_7 + \omega_8(0.39)$      |
| 50(1907) | 19567.91   | 3006.54   | 0.11      | $\omega_3 + \omega_{14} + \omega_{15}(0.84), \omega_2 + \omega_3 + \omega_6 + \omega_{14}(0.34)$ |
| 51(1943) | 19577.22   | 3015.86   | 1.88      | $\omega_{18} + \omega_{19}(0.83), \omega_{17} + \omega_{20}(0.32)$                               |
| 52(1948) | 19578.00   | 3016.64   | 3.66      | $\omega_{22}(0.63), \omega_{18} + \omega_{20}(0.33)$                                             |
| 53(1973) | 19586.63   | 3025.27   | 0.11      | $\omega_3 + \omega_{12} + \omega_{16}(0.59), \omega_2 + \omega_3 + \omega_8 + \omega_{10}(0.59)$ |

Table 11 (continued)

| Number   | Eigenvalue | Frequency | Intensity | Assignment                                                                                            |
|----------|------------|-----------|-----------|-------------------------------------------------------------------------------------------------------|
| 54(2031) | 19603.09   | 3041.72   | 0.65      | $2\omega_1 + \omega_3 + \omega_4 + \omega_{11}(0.76), \omega_3 + \omega_{10} + \omega_{17}(0.48)$     |
| 55(2034) | 19603.18   | 3041.81   | 1.38      | $\omega_3 + \omega_{10} + \omega_{17}(0.71), 2\omega_1 + \omega_3 + \omega_4 + \omega_{11}(0.52)$     |
| 56(2088) | 19619.50   | 3058.13   | 4.88      | $\omega_1 + \omega_5 + 2\omega_9(0.72), 2\omega_9 + \omega_{12}(0.4)$                                 |
| 57(2106) | 19624.48   | 3063.12   | 1.54      | $\omega_2 + \omega_4 + \omega_6 + \omega_{13}(0.82), 2\omega_2 + \omega_4 + \omega_5 + \omega_6(0.3)$ |
| 58(2110) | 19625.60   | 3064.23   | 53.93     | $\omega_{23}(0.68), \omega_{17} + \omega_{20}(0.39)$                                                  |
| 59(2234) | 19662.97   | 3101.61   | 0.36      | $\omega_{18} + \omega_{20}(0.69), 2\omega_3 + \omega_4 + \omega_{14}(0.38)$                           |
| 60(2386) | 19715.94   | 3154.58   | 0.27      | $\omega_1 + 2\omega_7 + \omega_8(0.85), \omega_1 + \omega_6 + \omega_7 + \omega_9(0.27)$              |

**Table 12** Intensity selection calculation for the PES + diagonal Coriolis operator with  $F = 2400$  eigenvalues of  $C_4H_4N_2$ . The parameters are  $p = 8$ ,  $E_{max} = 22000\text{cm}^{-1}$ ,  $\varepsilon = 0.03$  and  $\varepsilon_l = 0.1$  mk/mol.

| Number   | Eigenvalue | Frequency | Intensity | Assignment                                                                                       |
|----------|------------|-----------|-----------|--------------------------------------------------------------------------------------------------|
| 1(2)     | 16975.76   | 415.50    | 26.45     | $\omega_2(0.97), \omega_2 + \omega_{10}(0.15)$                                                   |
| 2(8)     | 17334.19   | 773.93    | 31.32     | $\omega_6(0.96), \omega_6 + \omega_{10}(0.17)$                                                   |
| 3(15)    | 17576.97   | 1016.72   | 31.15     | $\omega_{11}(0.96), \omega_{10} + \omega_{11}(0.18)$                                             |
| 4(18)    | 17604.36   | 1044.11   | 0.20      | $\omega_1 + \omega_4(0.97), \omega_1 + \omega_4 + \omega_{10}(0.16)$                             |
| 5(19)    | 17616.72   | 1056.47   | 8.98      | $\omega_{12}(0.91), \omega_1 + \omega_5(0.32)$                                                   |
| 6(20)    | 17652.32   | 1092.07   | 1.96      | $\omega_1 + \omega_5(0.91), \omega_{12}(0.32)$                                                   |
| 7(23)    | 17688.99   | 1128.74   | 6.70      | $\omega_{13}(0.91), \omega_2 + \omega_5(0.31)$                                                   |
| 8(25)    | 17705.47   | 1145.22   | 4.23      | $\omega_{14}(0.93), \omega_{10} + \omega_{14}(0.25)$                                             |
| 9(26)    | 17736.95   | 1176.70   | 0.48      | $\omega_2 + \omega_5(0.92), \omega_{13}(0.31)$                                                   |
| 10(34)   | 17834.58   | 1274.32   | 0.10      | $\omega_1 + \omega_8(0.92), \omega_2 + \omega_7(0.16)$                                           |
| 11(37)   | 17883.46   | 1323.21   | 0.83      | $\omega_2 + \omega_7(0.93), \omega_1 + \omega_8(0.15)$                                           |
| 12(41)   | 17924.34   | 1364.09   | 0.22      | $\omega_2 + \omega_8(0.95), \omega_2 + \omega_8 + \omega_{10}(0.15)$                             |
| 13(48)   | 17965.66   | 1405.41   | 30.07     | $\omega_{17}(0.95), \omega_{10} + \omega_{17}(0.2)$                                              |
| 14(57)   | 18037.66   | 1477.41   | 0.21      | $\omega_{18}(0.95), \omega_{10} + \omega_{18}(0.2)$                                              |
| 15(82)   | 18170.11   | 1609.86   | 0.16      | $\omega_3 + \omega_{11}(0.96), \omega_3 + \omega_{10} + \omega_{11}(0.18)$                       |
| 16(91)   | 18208.04   | 1647.79   | 0.30      | $\omega_3 + \omega_{12}(0.75), \omega_6 + \omega_7(0.5)$                                         |
| 17(93)   | 18216.37   | 1656.12   | 1.54      | $\omega_6 + \omega_7(0.71), \omega_3 + \omega_{12}(0.49)$                                        |
| 18(103)  | 18257.48   | 1697.23   | 1.85      | $\omega_6 + \omega_8(0.88), \omega_7 + \omega_9(0.26)$                                           |
| 19(109)  | 18281.59   | 1721.34   | 0.26      | $\omega_5 + \omega_9(0.92), \omega_6 + \omega_7(0.22)$                                           |
| 20(115)  | 18296.89   | 1736.63   | 0.16      | $\omega_3 + \omega_{14}(0.87), 2\omega_1 + \omega_{12}(0.3)$                                     |
| 21(130)  | 18349.51   | 1789.26   | 0.15      | $\omega_6 + \omega_{10}(0.91), \omega_6 + 2\omega_{10}(0.26)$                                    |
| 22(152)  | 18413.73   | 1853.48   | 0.11      | $\omega_4 + \omega_{14}(0.93), \omega_4 + \omega_{10} + \omega_{14}(0.25)$                       |
| 23(158)  | 18425.86   | 1865.61   | 0.27      | $\omega_1 + \omega_{19}(0.94), \omega_1 + \omega_{10} + \omega_{19}(0.2)$                        |
| 24(165)  | 18441.14   | 1880.88   | 0.56      | $\omega_7 + \omega_9(0.88), \omega_6 + \omega_8(0.28)$                                           |
| 25(176)  | 18475.03   | 1914.77   | 2.29      | $\omega_8 + \omega_9(0.9), \omega_6 + \omega_7(0.2)$                                             |
| 26(253)  | 18621.45   | 2061.19   | 0.35      | $\omega_7 + \omega_{14}(0.89), \omega_1 + \omega_6 + \omega_9(0.24)$                             |
| 27(259)  | 18629.25   | 2069.00   | 0.28      | $\omega_{10} + \omega_{12}(0.86), 2\omega_{10} + \omega_{12}(0.29)$                              |
| 28(272)  | 18652.90   | 2092.65   | 0.14      | $\omega_8 + \omega_{13}(0.92), \omega_2 + \omega_5 + \omega_8(0.23)$                             |
| 29(425)  | 18850.54   | 2290.29   | 0.21      | $\omega_{12} + \omega_{15}(0.84), \omega_2 + \omega_6 + \omega_{12}(0.29)$                       |
| 30(676)  | 19063.18   | 2502.93   | 0.13      | $\omega_9 + \omega_{19}(0.84), \omega_1 + \omega_3 + \omega_{19}(0.29)$                          |
| 31(899)  | 19189.22   | 2628.97   | 0.11      | $\omega_{12} + \omega_{20}(0.67), \omega_{15} + \omega_{17}(0.37)$                               |
| 32(943)  | 19211.15   | 2650.90   | 0.17      | $\omega_{13} + \omega_{19}(0.89), \omega_{10} + \omega_{13} + \omega_{19}(0.23)$                 |
| 33(979)  | 19228.71   | 2668.46   | 0.18      | $\omega_{14} + \omega_{19}(0.86), \omega_{10} + \omega_{14} + \omega_{19}(0.27)$                 |
| 34(1131) | 19297.18   | 2736.93   | 0.32      | $\omega_1 + 2\omega_6 + \omega_8(0.61), \omega_1 + \omega_6 + \omega_7 + \omega_9(0.28)$         |
| 35(1302) | 19364.74   | 2804.49   | 2.03      | $\omega_{16} + \omega_{18}(0.89), \omega_{23}(0.2)$                                              |
| 36(1540) | 19447.30   | 2887.05   | 0.12      | $\omega_2 + \omega_9 + \omega_{18}(0.7), 2\omega_7 + \omega_{12}(0.34)$                          |
| 37(1669) | 19485.76   | 2925.51   | 0.49      | $\omega_1 + \omega_5 + 2\omega_7(0.44), \omega_1 + \omega_6 + \omega_7 + \omega_9(0.44)$         |
| 38(1682) | 19489.06   | 2928.80   | 0.51      | $\omega_{17} + \omega_{19}(0.79), \omega_{22}(0.24)$                                             |
| 39(1761) | 19510.20   | 2949.95   | 0.26      | $2\omega_6 + \omega_{17}(0.88), 2\omega_6 + \omega_{10} + \omega_{17}(0.17)$                     |
| 40(1765) | 19511.10   | 2950.84   | 0.10      | $\omega_2 + \omega_8 + \omega_{20}(0.87), \omega_2 + \omega_8 + \omega_{10} + \omega_{20}(0.19)$ |
| 41(1769) | 19513.17   | 2952.91   | 0.12      | $4\omega_1 + \omega_6 + \omega_7(0.52), \omega_2 + \omega_4 + \omega_6 + \omega_{11}(0.37)$      |
| 42(1790) | 19517.27   | 2957.01   | 0.19      | $3\omega_1 + 2\omega_3 + \omega_5(0.53), \omega_1 + 3\omega_3 + \omega_5(0.31)$                  |
| 43(1799) | 19519.83   | 2959.58   | 0.29      | $2\omega_1 + 2\omega_2 + \omega_{17}(0.72), 3\omega_1 + \omega_2 + \omega_{18}(0.48)$            |
| 44(1802) | 19520.96   | 2960.71   | 11.82     | $\omega_{17} + \omega_{20}(0.7), \omega_{23}(0.39)$                                              |
| 45(1820) | 19526.92   | 2966.67   | 0.32      | $\omega_3 + \omega_{14} + \omega_{15}(0.84), \omega_2 + \omega_3 + \omega_6 + \omega_{14}(0.24)$ |
| 46(1917) | 19553.27   | 2993.02   | 0.34      | $\omega_3 + \omega_{12} + \omega_{16}(0.78), \omega_1 + 2\omega_3 + \omega_4 + \omega_5(0.25)$   |
| 47(1922) | 19554.14   | 2993.89   | 0.94      | $\omega_{18} + \omega_{19}(0.75), \omega_4 + \omega_{11} + \omega_{15}(0.29)$                    |

Table 12 (continued)

| Number   | Eigenvalue | Frequency | Intensity | Assignment                                                                                         |
|----------|------------|-----------|-----------|----------------------------------------------------------------------------------------------------|
| 48(1923) | 19554.44   | 2994.19   | 0.19      | $\omega_4 + \omega_{11} + \omega_{15}(0.54), \omega_2 + \omega_3 + \omega_9 + \omega_{11}(0.44)$   |
| 49(1943) | 19559.81   | 2999.56   | 4.07      | $\omega_{22}(0.64), \omega_{18} + \omega_{20}(0.41)$                                               |
| 50(1991) | 19572.58   | 3012.33   | 1.34      | $\omega_3 + \omega_{10} + \omega_{17}(0.8), \omega_3 + 2\omega_{10} + \omega_{17}(0.26)$           |
| 51(2066) | 19594.74   | 3034.49   | 2.67      | $\omega_2 + \omega_6 + \omega_8 + \omega_9(0.51), \omega_2 + \omega_5 + \omega_7 + \omega_8(0.39)$ |
| 52(2116) | 19608.72   | 3048.47   | 51.73     | $\omega_{23}(0.67), \omega_{17} + \omega_{20}(0.37)$                                               |
| 53(2130) | 19613.52   | 3053.27   | 6.16      | $\omega_2 + \omega_5 + \omega_7 + \omega_8(0.54), \omega_2 + \omega_6 + \omega_8 + \omega_9(0.4)$  |
| 54(2178) | 19626.31   | 3066.06   | 2.51      | $\omega_1 + 2\omega_7 + \omega_8(0.68), \omega_1 + \omega_6 + \omega_7 + \omega_9(0.34)$           |
| 55(2194) | 19632.35   | 3072.10   | 0.29      | $\omega_6 + \omega_8 + \omega_{16}(0.78), \omega_2 + \omega_6 + \omega_8 + \omega_9(0.29)$         |
| 56(2206) | 19634.99   | 3074.74   | 0.34      | $\omega_{18} + \omega_{20}(0.64), \omega_{22}(0.33)$                                               |
| 57(2209) | 19636.35   | 3076.09   | 0.27      | $\omega_6 + \omega_7 + \omega_{16}(0.43), \omega_{18} + \omega_{20}(0.42)$                         |

## Notes and references

- 1 M. J. Frisch, G. W. Trucks, H. B. Schlegel, G. E. Scuseria, M. A. Robb, J. R. Cheeseman, G. Scalmani, V. Barone, B. Mennucci, G. A. Petersson, H. Nakatsuji, M. Caricato, X. Li, H. P. Hratchian, A. F. Izmaylov, J. Bloino, G. Zheng, J. L. Sonnenberg, M. Hada, M. Ehara, K. Toyota, R. Fukuda, J. Hasegawa, M. Ishida, T. Nakajima, Y. Honda, O. Kitao, H. Nakai, T. Vreven, J. A. Montgomery, Jr., J. E. Peralta, F. Ogliaro, M. Bearpark, J. J. Heyd, E. Brothers, K. N. Kudin, V. N. Staroverov, R. Kobayashi, J. Normand, K. Raghavachari, A. Rendell, J. C. Burant, S. S. Iyengar, J. Tomasi, M. Cossi, N. Rega, J. M. Millam, M. Klene, J. E. Knox, J. B. Cross, V. Bakken, C. Adamo, J. Jaramillo, R. Gomperts, R. E. Stratmann, O. Yazyev, A. J. Austin, R. Cammi, C. Pomelli, J. W. Ochterski, R. L. Martin, K. Morokuma, V. G. Zakrzewski, G. A. Voth, P. Salvador, J. J. Dannenberg, S. Dapprich, A. D. Daniels, Ö. Farkas, J. B. Foresman, J. V. Ortiz, J. Cioslowski and D. J. Fox, Gaussian 09 Revision D.01, Gaussian Inc. Wallingford CT 2009.
- 2 V. K. Shen, D. W. Siderius, W. P. Krekelberg and H. W. Hatch, NIST Standard Reference Simulation Website, 2017, <https://webbook.nist.gov/cgi/cbook.cgi?ID=C75218&Units=SI&Type=IR-SPEC&Index=0#IR-SPEC>.
- 3 A. L. Smith, The Coblentz Society Desk Book of Infrared Spectra, The Coblentz Society Desk Book of Infrared Spectra, Second Edition, The Coblentz Society, 1982.
